# Supplementary material for: Natural Products as Chemopreventive Agents by Potential Inhibition of the Kinase Domain in ErbB Receptors
Source: PubMed Central journal article supplement (PMC6155853; doi:10.3390/molecules22020308), 2017-02-17
Supplement: molecules-22-00308-s001.pdf [file molecules-22-00308-s001.pdf]

# Supplementary Materials: Natural Products as Chemopreventive Agents by Potential Inhibition of the Kinase Domain in ErBb Receptors

Maria Olivero-Acosta, Wilson Maldonado-Rojas and Jesus Olivero-Verbel

**Table S1.** Protein characterization of human HER Receptor structures downloaded from PDB database.

| Receptor Type | PDB Code | Name                                     | Chain | residues | Ligand                                                                                                               | Method            | Resolution |
|---------------|----------|------------------------------------------|-------|----------|----------------------------------------------------------------------------------------------------------------------|-------------------|------------|
| HER 1         | 2ITW     | Epidermal growth factor receptor         | A     | 327      | 1,2,3,4-tetrahydrogen staurosporine                                                                                  | X-ray diffraction | 2.88       |
| HER 2         | 3PP0     | Receptor tyrosine-prot ein kinase erbb-2 | A, B  | 338      | 2-{2-[4-({5-chloro-6-[3-(trifluoromethyl)phenoxy]pyridin-3-yl)amino]-5h-pyrrolo [3,2-d]pyrimidin-5-yl]ethoxy}ethanol | X-ray diffraction | 2.25       |
| HER 3         | 3LMG     | Receptor tyrosine-prot ein kinase erbb-3 | A, B  | 344      | Phosphoaminophosphonic acid-adenylate ester                                                                          | X-ray diffraction | 2.8        |
| HER 4         | 2R4B     | Receptor tyrosine-prot ein kinase erbb-4 | A, B  | 321      | N-{3-chloro-4-[(3-fluorobenzyl)oxy]phenyl}-6-ethylthieno[3,2-d]pyrimidin-4-amine                                     | X-ray diffraction | 2.4        |

**Table S2.** Results of Multiple Alignment of Sequence Identity (%ID) Performed by SYBYL X-2.0 for Four HER Receptors.

| PDB CODE    | Human Her |      |      |      |
|-------------|-----------|------|------|------|
|             | 2ITW      | 2R4B | 3LMG | 3PP0 |
| 2ITW (HER1) | 100.0     | 80.3 | 65.9 | 82.7 |
| 2R4B (HER4) | 80.3      | 100  | 71.7 | 80.9 |
| 3LMG (HER3) | 65.9      | 71.7 | 100  | 67.4 |
| 3PP0 (HER2) | 82.7      | 80.9 | 67.4 | 100  |

**Table S3.** Multiple alignment of spatial coordinates for HER receptor pairs (by RMSD) using SYBYL X-2.0.

| PDB CODE    | Human Her |       |       |       |
|-------------|-----------|-------|-------|-------|
|             | 2ITW      | 2R4B  | 3LMG  | 3PP0  |
| 2ITW (HER1) | 0         | 4.378 | 4.162 | 5.682 |
| 2R4B (HER4) | 4.378     | 0     | 2.958 | 3.31  |
| 3LMG (HER3) | 4.162     | 2.958 | 0     | 3.656 |
| 3PP0 (HER2) | 5.682     | 3.31  | 3.656 | 0     |

```

1          11          21          31          41
2itw -----GEAPNQALLRILKETEFKKIKVLGSGAFGTVYKGLWIPEGEK
2r4b LVEPLTPSGTAPNQQLRILKETELKRVKVLGSGAFGTVYKGIWVPEGET
3lmg -V--L-----A-----RIFKETELRKLKVLGSGVFGTVHKGVWIPEGES
3pp0 -----APNQALLRILKETELRKVKVLGSGAFGTVYKGIWIPDGEN

51          61          71          81          91
2itw VKIPVAIKELREA-TSPKANKEILDEAYVMA--SVDNPHVCRLLGICLTS
2r4b VKIPVAIKIL--N-----ANVEFMDEALIMA--SMDHPLVRLLGVCCLSP
3lmg IKIPVCIKV-IEDKQSEQA-V--TDHML--AIGSLDHAHIVRLLGLCPGS
3pp0 VKIPVAIKVLRN-TSPKANKEILDEAYVMA--GVGSPYVSRLLLGICLTS

101         111         121         131         141
2itw TVQLITQLMPFGCLLDYVREHKDN---IGSQYLLNWCVQIAKGMNYLEDR
2r4b TIQLVTQLMPHGCLELYVREHKDN---IGSQLLNWCVQIAKGMNYLEER
3lmg SLQLVTQYLPGLSLLDVRQH---RGALGPQLLNWGVQIAKGMYYLEEH
3pp0 TVQLVTQLMPYGCLLDVRRE---NRGRLGSQDLLNWCVQIAKGMNYLEDV

151         161         171         181         191
2itw RLVHRDLAARNVLVKTQHVKITDFGLAKLLGAEKEYHAEGGKVPIKWM
2r4b RLVHRDLAARNVLVKSPNHVKITDFGLARLLEGDEKEYNADGGKMPIKWM
3lmg GMVHRNLAARNVLLKSPSQVQVADFGVADLLPPD-----D---TPIKWM
3pp0 RLVHRDLAARNVLVKTQHVKITDFGLARLLDIDETEYHA--GKVPIKWM

201         211         221         231         241
2itw ALESILHRIYTHQSDVWSYGVTVWELMTFGSKPYDGIPIASEISSILEKGE
2r4b ALECIHYRKFTHQSDVWSYGVTVWELMTFGGKPYDGIPTREIPDLLEKGE
3lmg ALESIHFGKYTHQSDVWSYGVTVWELMTFGAEPYAGLRLAEVDPDLLEKGE
3pp0 ALESILRRRFTHQSDVWSYGVTVWELMTFGAKPYDGIPIAREIPDLLEKGE

251         261         271         281         291
2itw RLPQPPICTIDVYMIMVKCWMIDADS--RPKPRELIIIEFSKMARDPQRYL
2r4b RLPQPPICTIDVYMVMVKCWMIDADS--RPKPKELAAEF SRMARDPQRYL
3lmg RLAQPQICTIDVYMVMVKCWMI--DENIRPTPKELANEFTRMARDPPRYL
3pp0 RLPQPPICTIDVYMIMVKCWMI--DSECRPRPRELVSEFSRWARDPQRFV

301         311
2itw VIQGMDDVVDADEY--LI
2r4b VIQD-----D-----
3lmg VI-----
3pp0 VIQ---NEPLDSTFYRSLI

```

Figure S1. Multiple alignments of amino acid sequences from evaluated HER structures using Sybyl X-2.0 program.

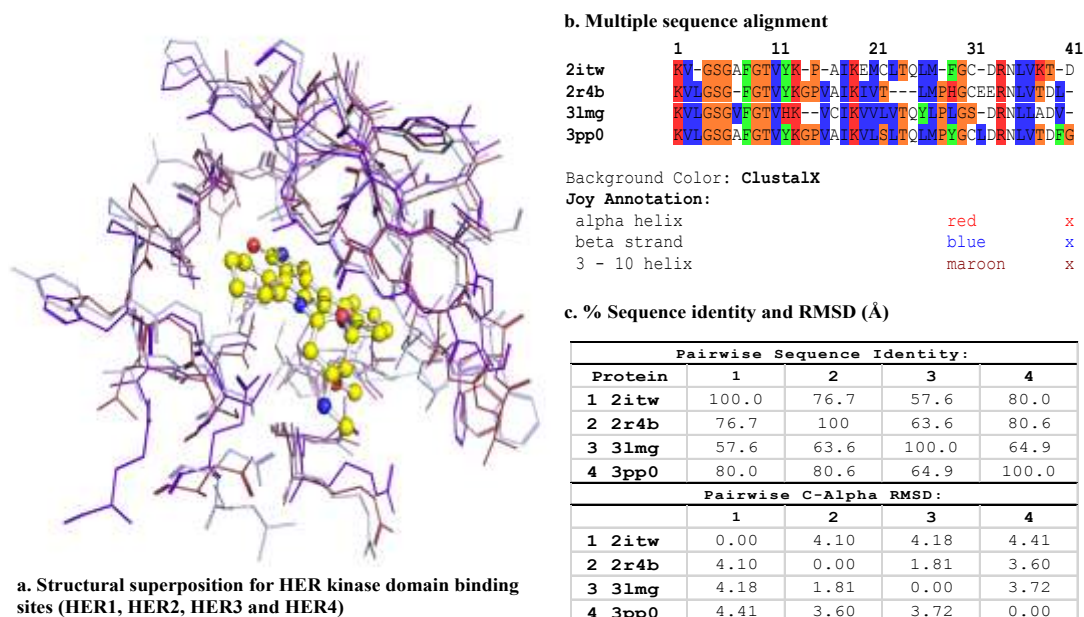

**Figure S2.** Structural superposition of four binding sites from HER kinase domain (1–4) (a); with the visualization of multiple sequence alignment (Clustal X) (b); and determination of percentage sequence and RMSD (c) matrix.

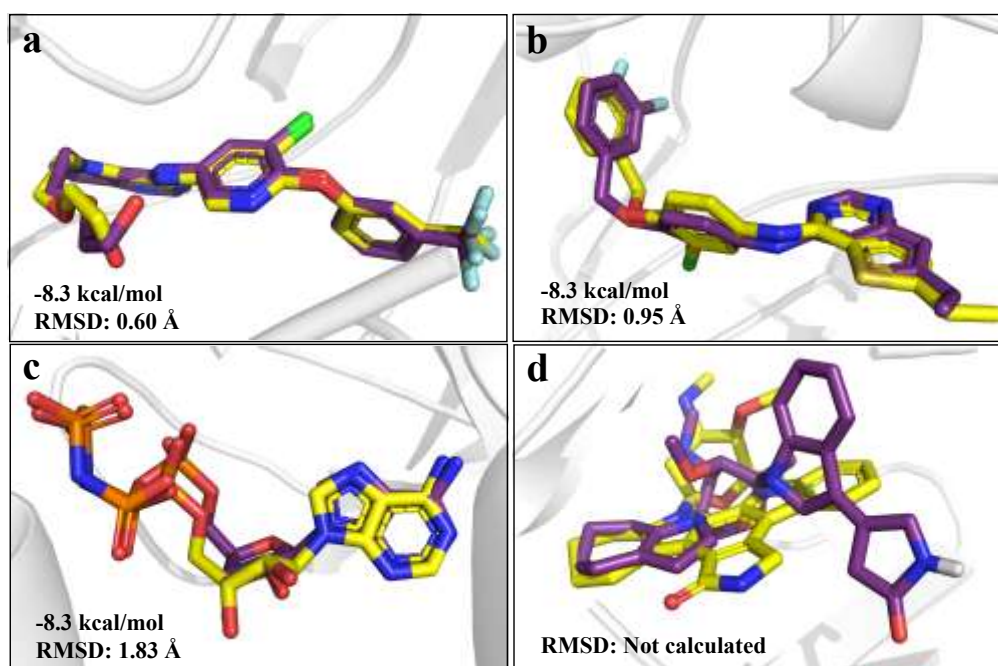

**Figure S3.** Molecular superposition between predicted with AutoDock Vina (yellow) and co-crystallized pose (purple) co-crystallized ligand for HER2 (3PP0) (a); HER4 (2R4B) (b); HER3 (3LMG) (c); and HER1 (2ITW). The RMSD values for 2ITW were not calculated due to fragmentation of their co-crystallized ligand in posterior docking procedures.

**Table S4.**AutoDock Vina Affinity scores for ligands on HER1 and their half maximal inhibitory concentrations (IC<sub>50</sub>).

| No. | CID      | Mean AV Affinity<br>(Kcal/mol) | IC <sub>50</sub> (μM) | Log IC <sub>50</sub> |
|-----|----------|--------------------------------|-----------------------|----------------------|
| 1.  | 45483677 | -8.7 ± 0.05                    | 0.019                 | -1.721               |
| 2.  | 45483696 | -8.7 ± 0.05                    | 0.033                 | -1.481               |
| 3.  | 45483687 | -8.6 ± 0.05                    | 0.030                 | -1.523               |
| 4.  | 45483674 | -8.6 ± 0.0                     | 0.023                 | -1.638               |
| 5.  | 45483694 | -8.6 ± 0.14                    | 0.045                 | -1.347               |
| 6.  | 45483675 | -8.6 ± 0.05                    | 0.023                 | -1.638               |
| 7.  | 45483689 | -8.5 ± 0.0                     | 0.038                 | -1.420               |
| 8.  | 10437018 | -8.3 ± 0.08                    | 0.032                 | -1.495               |
| 9.  | 45483685 | -8.2 ± 0.08                    | 0.044                 | -1.357               |
| 10. | 45483693 | -8.1 ± 0.05                    | 0.038                 | -1.420               |
| 11. | 5328762  | -8.1 ± 0.0                     | 15.000                | 1.176                |
| 12. | 1838043  | -8.1 ± 0.05                    | 12.000                | 1.079                |
| 13. | 45483699 | -8.0 ± 0.12                    | 0.111                 | -0.955               |
| 14. | 45483691 | -8.0 ± 0.0                     | 0.040                 | -1.398               |
| 15. | 45483695 | -8.0 ± 0.14                    | 0.021                 | -1.678               |
| 16. | 5328763  | -7.8 ± 0.19                    | 14.000                | 1.146                |
| 17. | 5328770  | -7.8 ± 0.05                    | 0.700                 | -0.155               |
| 18. | 5328767  | -7.7 ± 0.0                     | 24.000                | 1.380                |
| 19. | 5328765  | -7.7 ± 0.19                    | 11.000                | 1.041                |
| 20. | 5328779  | -7.7 ± 0.05                    | 0.100                 | -1.000               |
| 21. | 5328760  | -7.6 ± 0.19                    | 5.000                 | 0.699                |
| 22. | 5328781  | -7.5 ± 0.05                    | 10.300                | 1.013                |
| 23. | 5328764  | -7.4 ± 0.0                     | 6.600                 | 0.820                |
| 24. | 5328774  | -7.4 ± 0.0                     | 2.100                 | 0.322                |
| 25. | 5328775  | -7.4 ± 0.0                     | 5.000                 | 0.699                |
| 26. | 5328776  | -7.4 ± 0.05                    | 49.000                | 1.690                |
| 27. | 5328771  | -7.3 ± 0.0                     | 1.250                 | 0.097                |
| 28. | 5328773  | -7.2 ± 0.0                     | 0.625                 | -0.204               |
| 29. | 5353388  | -7.2 ± 0.0                     | 2.500                 | 0.398                |
| 30. | 2385464  | -7.0 ± 0.0                     | 5.900                 | 0.771                |
| 31. | 5328766  | -7.0 ± 0.0                     | 31.000                | 1.491                |
| 32. | 5328768  | -6.0 ± 0.0                     | 4.500                 | 0.653                |

**Table S5.**AutoDock Vina Affinity scores for ligands on HER2 and their half maximal inhibitory concentrations (IC<sub>50</sub>).

| No  | CID      | Binding Affinity | IC <sub>50</sub> (uM) | Log IC <sub>50</sub> |
|-----|----------|------------------|-----------------------|----------------------|
| 1.  | 56835161 | -11.5 ± 0.0      | 0.062                 | -1.208               |
| 2.  | 11679357 | -11.1 ± 0.1      | 0.009                 | -2.046               |
| 3.  | 57392589 | -11.0 ± 0.0      | 0.140                 | -0.854               |
| 4.  | 57390776 | -11.0 ± 0.1      | 0.041                 | -1.387               |
| 5.  | 11955109 | -10.7 ± 0.0      | 0.018                 | -1.745               |
| 6.  | 57392590 | -10.7 ± 0.2      | 0.110                 | -0.959               |
| 7.  | 57396070 | -10.7 ± 0.1      | 0.130                 | -0.886               |
| 8.  | 57397871 | -10.6 ± 0.0      | 0.220                 | -0.658               |
| 9.  | 57400426 | -10.6 ± 0.0      | 0.073                 | -1.137               |
| 10. | 57401286 | -10.5 ± 0.0      | 0.086                 | -1.066               |
| 11. | 57390777 | -10.5 ± 0.1      | 0.030                 | -1.523               |
| 12. | 57392591 | -10.4 ± 0.1      | 0.120                 | -0.921               |
| 13. | 11620908 | -10.2 ± 0.0      | 0.017                 | -1.770               |
| 14. | 56849848 | -10.2 ± 0.0      | 0.050                 | -1.301               |
| 15. | 57397872 | -10.2 ± 0.0      | 0.180                 | -0.745               |
| 16. | 57392588 | -10.1 ± 0.1      | 0.041                 | -1.387               |
| 17. | 56849846 | -10.0 ± 0.1      | 0.124                 | -0.907               |

|                        |                                                                                                                                 |             |        |        |
|------------------------|---------------------------------------------------------------------------------------------------------------------------------|-------------|--------|--------|
| 18.                    | 57401285                                                                                                                        | -10.0 ± 0.1 | 0.750  | -0.125 |
| 19.                    | 56849849                                                                                                                        | -9.9 ± 0.0  | 0.061  | -1.215 |
| 20.                    | 56849562                                                                                                                        | -9.8 ± 0.0  | 1.884  | 0.275  |
| 21.                    | 56849847                                                                                                                        | -9.8 ± 0.1  | 0.210  | -0.678 |
| 22.                    | 56849560                                                                                                                        | -9.7 ± 0.0  | 0.692  | -0.160 |
| 23.                    | 56851591                                                                                                                        | -9.6 ± 0.0  | 1.063  | 0.027  |
| 24.                    | 56851589                                                                                                                        | -9.5 ± 0.0  | 0.875  | -0.058 |
| 25.                    | 56851594                                                                                                                        | -9.5 ± 0.2  | 0.650  | -0.187 |
| 26.                    | 56851288                                                                                                                        | -9.5 ± 0.1  | 1.143  | 0.058  |
| 27.                    | 56851053                                                                                                                        | -9.4 ± 0.1  | 1.076  | 0.032  |
| 28.                    | 123631                                                                                                                          | -9.4 ± 0.0  | 0.240  | -0.620 |
| 29.                    | 56851052                                                                                                                        | -9.4 ± 0.0  | 1.378  | 0.139  |
| 30.                    | 56851588                                                                                                                        | -9.3 ± 0.0  | 2.328  | 0.367  |
| 31.                    | 56851590                                                                                                                        | -9.3 ± 0.1  | 2.543  | 0.405  |
| 32.                    | 56851166                                                                                                                        | -9.3 ± 0.1  | 0.069  | -1.161 |
| 33.                    | 56851432                                                                                                                        | -9.3 ± 0.1  | 0.787  | -0.104 |
| 34.                    | 56850930                                                                                                                        | -9.2 ± 0.1  | 0.601  | -0.221 |
| 35.                    | 11684629                                                                                                                        | -9.2 ± 0.1  | 0.027  | -1.569 |
| 36.                    | 56849702                                                                                                                        | -9.2 ± 0.0  | 0.582  | -0.235 |
| 37.                    | 56849701                                                                                                                        | -9.1 ± 0.0  | 0.212  | -0.674 |
| 38.                    | 16736274                                                                                                                        | -9.0 ± 0.1  | 2.170  | 0.336  |
| 39.                    | 56850806                                                                                                                        | -9.0 ± 0.2  | 0.406  | -0.391 |
| 40.                    | 56851051                                                                                                                        | -9.0 ± 0.3  | 0.699  | -0.156 |
| 41.                    | 56849558                                                                                                                        | -9.0 ± 0.0  | 0.184  | -0.735 |
| 42.                    | 56851431                                                                                                                        | -8.9 ± 0.1  | 0.956  | -0.020 |
| 43.                    | 56851592                                                                                                                        | -8.9 ± 0.0  | 0.762  | -0.118 |
| 44.                    | 56851428                                                                                                                        | -8.9 ± 0.1  | 1.267  | 0.103  |
| 45.                    | 56849555                                                                                                                        | -8.8 ± 0.0  | 1.160  | 0.064  |
| 46.                    | 56851429                                                                                                                        | -8.8 ± 0.0  | 1.413  | 0.150  |
| 47.                    | 56851593                                                                                                                        | -8.8 ± 0.0  | 1.216  | 0.085  |
| 48.                    | 56851430                                                                                                                        | -8.8 ± 0.1  | 0.459  | -0.338 |
| 49.                    | 56851427                                                                                                                        | -8.7 ± 0.1  | 0.737  | -0.133 |
| 50.                    | 56849704                                                                                                                        | -8.7 ± 0.0  | 0.116  | -0.936 |
| 51.                    | 56849556                                                                                                                        | -8.7 ± 0.5  | 2.049  | 0.312  |
| 52.                    | 56851290                                                                                                                        | -8.6 ± 0.1  | 0.869  | -0.061 |
| 53.                    | 56851433                                                                                                                        | -8.6 ± 0.1  | 4.473  | 0.651  |
| 54.                    | 56849563                                                                                                                        | -8.5 ± 0.1  | 0.097  | -1.013 |
| 55.                    | 56849703                                                                                                                        | -8.4 ± 0.0  | 0.054  | -1.268 |
| 56.                    | 176870                                                                                                                          | -7.9 ± 0.1  | 0.760  | -0.119 |
| 57.                    | 10205                                                                                                                           | -7.4 ± 0.0  | 30.800 | 1.489  |
| Co-crystallized ligand | 2-{2-[4-({5-chloro-6-[3-(trifluoromethyl)phenoxy]pyridin-3-yl)amino)-5H-pyrrolo[3,2-d]pyrimidin-5-yl]ethoxy}ethanol (SYR127063) | -10.9 ± 0.0 | 0.011  | -1.959 |

**Table S6.** AutoDock Vina Affinity scores for ligands on HER4 and their half maximal inhibitory concentrations (IC<sub>50</sub>).

| No.                    | CID                                                                                      | Binding Affinity | IC <sub>50</sub> | LogIC <sub>50</sub> |
|------------------------|------------------------------------------------------------------------------------------|------------------|------------------|---------------------|
| 1.                     | 11503073                                                                                 | -10.1 ± 0.05     | 0.229            | -0.640              |
| 2.                     | 11604864                                                                                 | -10.0 ± 0.09     | 0.0018           | -2.745              |
| 3.                     | 2776                                                                                     | -10.0 ± 0.05     | 0.012            | -1.921              |
| 4.                     | 11632391                                                                                 | -10.0 ± 0.05     | 0.0024           | -2.620              |
| 5.                     | 11524106                                                                                 | -9.9 ± 0.0       | 0.0071           | -2.149              |
| 6.                     | 11539461                                                                                 | -9.8 ± 0.0       | 0.0062           | -2.208              |
| 7.                     | 9907221                                                                                  | -9.8 ± 0.0       | 0.0017           | -2.770              |
| 8.                     | 11711590                                                                                 | -9.7 ± 0.05      | 0.644            | -0.191              |
| 9.                     | 11590557                                                                                 | -9.6 ± 0.1       | 0.0043           | -2.367              |
| 10.                    | 11595844                                                                                 | -9.6 ± 0.0       | 0.0073           | -2.137              |
| 11.                    | 11568720                                                                                 | -9.6 ± 0.1       | 0.001            | -3.000              |
| 12.                    | 11713043                                                                                 | -9.6 ± 0.1       | 0.001            | -3.000              |
| 13.                    | 11566580                                                                                 | -9.6 ± 0.1       | 0.0005           | -3.301              |
| 14.                    | 11553647                                                                                 | -9.5 ± 0.0       | 0.31             | -0.509              |
| 15.                    | 18176200                                                                                 | -9.4 ± 0.1       | 0.013            | -1.886              |
| 16.                    | 11719423                                                                                 | -9.4 ± 0.0       | 0.011            | -1.959              |
| 17.                    | 156413                                                                                   | -9.3 ± 0.0       | 0.031            | -1.509              |
| 18.                    | 11518389                                                                                 | -9.2 ± 0.1       | 0.0012           | -2.921              |
| 19.                    | 11613187                                                                                 | -9.2 ± 0.1       | 0.0008           | -3.097              |
| 20.                    | 11532242                                                                                 | -9.2 ± 0.1       | 0.016            | -1.796              |
| 21.                    | 11496207                                                                                 | -9.1 ± 0.0       | 0.538            | -0.269              |
| 22.                    | 71583657                                                                                 | -8.9 ± 0.1       | 0.24             | -0.620              |
| 23.                    | 11518637                                                                                 | -8.4 ± 0.0       | 0.624            | -0.205              |
| 24.                    | 11634425                                                                                 | -8.2 ± 0.2       | 0.073            | -1.137              |
| Co-crystallized ligand | <i>N</i> -{3-chloro-4-[(3-fluorobenzyl)oxy]phenyl}-6-ethylthieno[3,2-d]pyrimidin-4-amine | -10.7 ± 0.0      | 0.060            | -1.222              |

**Table S7.** 800 NPs from NatProd Collection, MicroSource Discovery Systems.

| #  | SYBYL-CODE | ID       | MOLECULE NAME                                    | Formula                                                                       | MolWt  | cas#                   | Class    | Bioactivity                                                     | Source                                                                                                                                   |
|----|------------|----------|--------------------------------------------------|-------------------------------------------------------------------------------|--------|------------------------|----------|-----------------------------------------------------------------|------------------------------------------------------------------------------------------------------------------------------------------|
| 1  | 538988232  | 01505672 | VINCRISTINE SULFATE                              | C <sub>46</sub> H <sub>58</sub> N <sub>4</sub> O <sub>14</sub> S              | 923.06 | 2068-78-2              | alkaloid | antineoplastic                                                  | Vinca rosea; 37231, NSC-67574                                                                                                            |
| 2  | 538988131  | 01505464 | THIAMINE                                         | C <sub>12</sub> H <sub>18</sub> Cl <sub>2</sub> N <sub>4</sub> O <sub>5</sub> | 337.27 | 67-03-8                | alkaloid | vitamin B1, enzyme cofactor                                     | rice husks, wheat germ, yeast                                                                                                            |
| 3  | 538988127  | 01505453 | PYRIDOXINE                                       | C <sub>8</sub> H <sub>11</sub> NO <sub>3</sub>                                | 169.18 | 65-23-6                | alkaloid | vitamin B6, enzyme cofactor                                     | rice husks, wheat germ, yeast                                                                                                            |
| 4  | 1206009    | 01500821 | BICUCULLINE (+)                                  | C <sub>20</sub> H <sub>17</sub> NO <sub>6</sub>                               | 367.36 | 485-49-4               | alkaloid | GABAa antagonist                                                | <i>Dicentra cucullaria</i> , <i>Corydalis</i> spp.                                                                                       |
| 5  | 538985342  | 01503922 | TRYPTAMINE                                       | C <sub>10</sub> H <sub>12</sub> N <sub>2</sub>                                | 160.22 | 61-54-1                | alkaloid | psychotropic                                                    | <i>Acacia</i> spp., <i>Lens esculenta</i> , <i>Prosopis juliflora</i> and fungi <i>Panaeolus foenicicii</i> and <i>Coprinus micaceus</i> |
| 6  | 1073       | 01500655 | ACONITINE                                        | C <sub>34</sub> H <sub>47</sub> NO <sub>11</sub>                              | 645.75 | 302-27-2               | alkaloid | anesthetic (gastric), antipyretic, and cardiotoxin              | <i>Aconitum</i> spp.                                                                                                                     |
| 7  | 538987949  | 01505002 | LAPPACONITINE                                    | C <sub>32</sub> H <sub>44</sub> N <sub>2</sub> O <sub>8</sub>                 | 584.72 | 32854-75-4             | alkaloid | analgesic, antiarrhythmic                                       | <i>Aconitum</i> spp. and <i>Delphinium cashmirianum</i>                                                                                  |
| 8  | 538986699  | 00300010 | AGELASINE (stereochemistry of diterpene unknown) | C <sub>26</sub> H <sub>40</sub> CIN <sub>5</sub>                              | 458.10 |                        | alkaloid | cytotoxic, antineoplastic                                       | <i>Agelas dispar</i>                                                                                                                     |
| 9  | 538977864  | 00350011 | AJMALINE DIACETATE                               | C <sub>24</sub> H <sub>30</sub> N <sub>2</sub> O <sub>4</sub>                 | 410.52 | 19775-56-5             | alkaloid |                                                                 | ajmaline derivative                                                                                                                      |
| 10 | 538985919  | 00100279 | LYCORINE                                         | C <sub>16</sub> H <sub>17</sub> NO <sub>4</sub>                               | 287.32 | 476-28-8               | alkaloid |                                                                 | <i>Amaryllidaceae</i> spp.                                                                                                               |
| 11 | 538977955  | 01503982 | AGMATINE SULFATE                                 | C <sub>5</sub> H <sub>16</sub> N <sub>4</sub> O <sub>4</sub> S                | 228.27 | 2482-00-0              | alkaloid | NMDA blocker, alpha-2 adrenergic agonist; NO synthase inhibitor | <i>Ambrosia entemisiifolia</i>                                                                                                           |
| 12 | 538986031  | 01504155 | APHYLLIC ACID                                    | C <sub>15</sub> H <sub>26</sub> N <sub>2</sub> O <sub>2</sub>                 | 266.39 | 642-67-1               | alkaloid |                                                                 | <i>Anabasis aphylla</i>                                                                                                                  |
| 13 | 538986602  | 01505240 | LUPANYL ACID HYDROCHLORIDE                       | C <sub>14</sub> H <sub>25</sub> CIN <sub>2</sub> O <sub>2</sub>               | 288.82 |                        | alkaloid |                                                                 | <i>Anabasis aphylla</i>                                                                                                                  |
| 14 | 538986032  | 01504156 | ANABASAMINE HYDROCHLORIDE                        | C <sub>16</sub> H <sub>20</sub> CIN <sub>3</sub>                              | 289.81 | 20410-87-1(base)       | alkaloid |                                                                 | <i>Anabasis aphylla</i>                                                                                                                  |
| 15 | 538978159  | 00310004 | ANABASINE HYDROCHLORIDE                          | C <sub>10</sub> H <sub>15</sub> CIN <sub>2</sub>                              | 198.70 | 13078-04-1 (anabesine) | alkaloid | insecticide                                                     | <i>Anabasis aphylla</i> & <i>Nicotiana</i> spp.                                                                                          |
| 16 | 538978111  | 01504021 | LUPININE                                         | C <sub>10</sub> H <sub>19</sub> NO                                            | 169.27 | 486-70-4               | alkaloid | antifeedant, antiinflammatory, oxytoxic                         | <i>Anabasis aphylla</i> , <i>Lupinus</i> spp.                                                                                            |

|    |           |          |                            |               |        |                                  |          |                                                                                                                                                                                                                           |                                                                                |
|----|-----------|----------|----------------------------|---------------|--------|----------------------------------|----------|---------------------------------------------------------------------------------------------------------------------------------------------------------------------------------------------------------------------------|--------------------------------------------------------------------------------|
| 17 | 538978113 | 01504023 | THERMOPSINE<br>PERCHLORATE | C15H21ClN2O5  | 344.80 | 486-90-8(base)                   | alkaloid |                                                                                                                                                                                                                           | <i>Anabasis aphylla</i> ,<br><i>Thermopsis</i> spp.                            |
| 18 | 1206020   | 01500866 | HARMANE                    | C12H10N2      | 182.23 | 486-84-0                         | alkaloid | intercalating agent,<br>sedative                                                                                                                                                                                          | <i>Arariba rubra</i> .                                                         |
| 19 | 1201788   | 01500706 | ARCAINE SULFATE            | C6H18N6O4S    | 270.31 | 36587-93-6                       | alkaloid |                                                                                                                                                                                                                           | <i>Arca noae</i>                                                               |
| 20 | 538986247 | 01502126 | GUVACINE<br>HYDROCHLORIDE  | C6H10ClNO2    | 163.61 | 498-96-4                         | alkaloid | muscarinic agonist,<br>GABA uptake<br>inhibitor                                                                                                                                                                           | <i>Areca catechu</i>                                                           |
| 21 | 538986722 | 01500878 | TROPINE                    | C8H15NO       | 141.21 | 120-29-6                         | alkaloid |                                                                                                                                                                                                                           | <i>Atropa belladonna</i> ,<br><i>Hyoscyamus niger</i> ,<br><i>Datura</i> spp.. |
| 22 | 1207072   | 01500876 | CORYNANTHINE               | C21H26N2O3    | 354.45 | 123333-62-0                      | alkaloid |                                                                                                                                                                                                                           | bark of <i>Pseudocinchona<br/>africana</i> Chev.                               |
| 23 | 1210806   | 01500811 | BERBERINE<br>CHLORIDE      | C20H18ClNO4   | 371.82 | 633-65-8, 2086-83-1              | alkaloid | antiarrhythmic,<br>alpha2 agonist,<br>cholinesterase,<br>anticonvulsant,<br>antiinflammatory,<br>antibacterial,<br>antifungal,<br>antitrypanosomal,<br>antineoplastic,<br>immunostimulant;<br>LD50(mouse) 329<br>mg/kg po | <i>Berberis</i> and <i>Mahonia</i><br>spp.                                     |
| 24 | 538978123 | 01501019 | BERBAMINE<br>HYDROCHLORIDE | C37H42Cl2N2O6 | 681.66 | 478-61-5<br>(berbamine)          | alkaloid | antihypertensive,<br>skeletal muscle<br>relaxant                                                                                                                                                                          | <i>Berberis</i> spp.                                                           |
| 25 | 39        | 01500680 | ARECOLINE<br>HYDROBROMIDE  | C8H14BrNO2    | 236.11 | 300-08-3, 63-75-2<br>[arecoline] | alkaloid | anthelmintic<br>(Cestodes),<br>hypotensive,<br>cathartic                                                                                                                                                                  | betel nuts<br>( <i>Arica catechu</i> )                                         |
| 26 | 1207066   | 01500873 | PIPERINE                   | C17H19NO3     | 285.35 | 94-62-2                          | alkaloid | analeptic,<br>antibacterial                                                                                                                                                                                               | black pepper<br>( <i>Piper nigrum</i> L.)                                      |
| 27 | 538986749 | 01505320 | INDOLE-3-CARBINOL          | C9H9NO        | 147.18 | 700-06-1                         | alkaloid | antineoplastic                                                                                                                                                                                                            | <i>Brassica</i> spp.                                                           |
| 28 | 462       | 01500649 | THEOBROMINE                | C7H8N4O2      | 180.17 | 83-67-0                          | alkaloid | diuretic,<br>bronchodilator,<br>cardiotonic                                                                                                                                                                               | <i>Camelia</i> , <i>Theobroma</i> ,<br><i>Cola</i> spp.                        |
| 29 | 538985670 | 01502232 | CAMPTOTHECIN               | C20H16N2O4    | 348.36 | 7689-03-4                        | alkaloid | antineoplastic                                                                                                                                                                                                            | <i>Camptotheca acuminata</i>                                                   |
| 30 | 538986018 | 01504123 | 10-HYDROXYCAMPTO<br>THECIN | C20H16N2O5    | 364.36 | 19685-09-7                       | alkaloid | antineoplastic                                                                                                                                                                                                            | <i>Camptotheca acuminata</i>                                                   |
| 31 | 538986436 | 00501332 | PHENACYLAMINE              | C8H10ClNO     | 171.63 |                                  | alkaloid |                                                                                                                                                                                                                           | <i>Castanopsis cuspidata</i> ,                                                 |



| HYDROCHLORIDE |           |          |                            |              |        |                                     |          | <i>Vitis</i> spp.                                                                                                                           |
|---------------|-----------|----------|----------------------------|--------------|--------|-------------------------------------|----------|---------------------------------------------------------------------------------------------------------------------------------------------|
| 32            | 1207078   | 01500826 | CEPHALOTAXINE              | C18H21NO4    | 315.37 | 24316-19-6                          | alkaloid | <i>Cephalotaxus drupacea</i><br>and<br><i>C. fortunei</i>                                                                                   |
| 33            | 1206012   | 01500824 | CHELIDONINE (+)            | C20H19NO5    | 353.38 | 476-32-4                            | alkaloid | antineoplastic,<br>smooth muscle<br>relaxant,<br>hypotensive,<br>CNS depressant<br><i>Chelidonium majus</i> ,<br>Linn. ( <i>celandine</i> ) |
| 34            | 1207065   | 01500871 | NORHARMAN                  | C11H8N2      | 168.20 | 244-63-3                            | alkaloid | plant growth<br>inhibitor; mutagen<br><i>Chrysophyllum</i> and<br><i>Nocardia</i> spp.                                                      |
| 35            | 1200719   | 01500657 | HYDROQUINIDINE             | C20H26N2O2   | 326.44 | 1435-55-8                           | alkaloid | antiarrhythmic,<br>antimalarial<br>Cinchona bark                                                                                            |
| 36            | 1210789   | 01500839 | CINCHONIDINE               | C19H22N2O    | 294.40 | 485-71-2                            | alkaloid | antimalarial<br><i>Cinchona</i> spp.                                                                                                        |
| 37            | 1210790   | 01500841 | CINCHONINE                 | C19H22N2O    | 294.40 | 5949-16-6, 118-10-5<br>[cinchonine] | alkaloid | antimalarial<br><i>Cinchona</i> spp.                                                                                                        |
| 38            | 538978120 | 01800067 | COLCHICEINE                | C21H23NO6    | 385.42 | 477-27-0                            | alkaloid | antimitotic<br><i>Colchicum autumnale</i>                                                                                                   |
| 39            | 538978119 | 01500205 | COLCHICINE                 | C22H25NO6    | 399.45 | 64-86-8                             | alkaloid | antimitotic,<br>antigout agent<br><i>Colchicum autumnale</i>                                                                                |
| 40            | 538976408 | 01502237 | HARMOL<br>HYDROCHLORIDE    | C12H11CIN2O  | 234.69 | 40580-83-4                          | alkaloid | MAO inhibitor<br>common plant<br>alkaloid                                                                                                   |
| 41            | 1210708   | 01500853 | CHONDROSINE                | C12H21NO11   | 355.30 |                                     | alkaloid | component of<br>chondroitin sulfate;<br>mammalian amniotic<br>fluid and placenta                                                            |
| 42            | 143       | 01504178 | TETRAHYDROPALMA<br>TINE    | C21H25NO4    | 355.44 | 3520-14-7                           | alkaloid | analgesic, hypnotic,<br>papaverine-like<br><i>Corydalis</i> spp.                                                                            |
| 43            | 538977860 | 01500663 | YOHIMBINE<br>HYDROCHLORIDE | C21H27CIN2O3 | 390.91 | 65-19-0                             | alkaloid | alpha adrenergic<br>blocker, mydriatic,<br>antidepressant<br><i>Corynanthe</i> spp.                                                         |
| 44            | 1201068   | 00100525 | CRINAMINE                  | C17H19NO4    | 301.35 | 639-41-8                            | alkaloid | antihypertensive,<br>respiratory<br>depressant,<br>antineoplastic<br>Crineum species                                                        |
| 45            | 1200999   | 00100530 | AMBELLINE                  | C18H21NO5    | 331.37 | 3660-62-6                           | alkaloid | immune stimulant,<br>cytotoxic<br><i>Crinium glaucum</i> ,<br><i>Bruswigia rosea</i> ,<br><i>Amaryllis belladonna</i>                       |
| 46            | 538980230 | 01502252 | MONOCROTALINE              | C16H23NO6    | 325.36 | 315-22-0                            | alkaloid | antineoplastic, insect<br>sterilant<br><i>Crotalaria</i> spp.                                                                               |
| 47            | 538986149 | 01504205 | DELTA LINE                 | C24H37NO7    | 451.56 | 6836-11-9                           | alkaloid | antiarrhythmic<br><i>Delphinium</i> spp.                                                                                                    |
| 48            | 538977878 | 00100599 | 2-METHYL GRAMINE           | C12H16N2     | 188.27 |                                     | alkaloid | derivative                                                                                                                                  |
| 49            | 1201558   | 00100563 | OXONITINE                  | C33H43NO12   | 645.71 |                                     | alkaloid | derivative of aconitine                                                                                                                     |

|    |           |          |                                 |              |        |                                                               |          |                                                        |                                                                                                         |
|----|-----------|----------|---------------------------------|--------------|--------|---------------------------------------------------------------|----------|--------------------------------------------------------|---------------------------------------------------------------------------------------------------------|
| 50 | 538988023 | 01505169 | DESOXYPEGANINE<br>HYDROCHLORIDE | C11H13CIN2   | 208.69 | 61939-05-7                                                    | alkaloid | acetylcholinesterase<br>inhibitor,<br>antiParkinsonism | derivative of <i>peganine</i><br><i>Peganum</i> spp.                                                    |
| 51 | 538977073 | 02300324 | PLECTOCOMINE<br>METHYL ETHER    | C12H14N2O    | 202.26 |                                                               | alkaloid | MAO inhibitor                                          | derivative<br><i>Plectocomiopsis</i> spp.                                                               |
| 52 | 538977643 | 00310038 | SCOPOLINE                       | C8H13NO2     | 155.20 |                                                               | alkaloid |                                                        | dervative of<br>scopolamine                                                                             |
| 53 | 1206016   | 01500860 | S-ISOCORYDINE (+)               | C20H23NO4    | 341.41 | 475-67-2                                                      | alkaloid | sedative, cholinergic                                  | <i>Dicentra canadensis</i> ,<br><i>Artabotyris</i><br><i>suaveoleus</i> and<br><i>Cordyalis</i> species |
| 54 | 1201148   | 00100541 | DICTAMNINE                      | C12H9NO2     | 199.21 | 484-29-7                                                      | alkaloid |                                                        | <i>Dictamnus albus</i> and<br>other Rutaceae                                                            |
| 55 | 1207079   | 01500939 | NORELEAGNINE                    | C11H12N2     | 172.23 |                                                               | alkaloid |                                                        | <i>Elaenus</i> spp.                                                                                     |
| 56 | 538978110 | 01504020 | EVOXINE                         | C18H21NO6    | 347.37 | 522-11-2                                                      | alkaloid |                                                        | <i>Eoodia xanthoxyloides</i>                                                                            |
| 57 | 1210907   | 01501202 | GALANTHAMINE<br>HYDROBROMIDE    | C17H22BrNO3  | 368.27 | 357-70-0,<br>1953-04-4<br>[hydrobromide]                      | alkaloid | anticholinesterase,<br>analgesic,<br>antiAlzheimer     | <i>Galanthus</i> , <i>Narcissus</i><br>and other Lillaceae                                              |
| 58 | 538977967 | 01503990 | CONESSINE                       | C24H40N2     | 356.60 | 5913-82-6,<br>546-06-5<br>[conessine]                         | alkaloid |                                                        | <i>Holarrhena</i> spp.                                                                                  |
| 59 | 538977556 | 00300537 | XANTHOPTERIN                    | C6H5N5O2     | 179.14 | 119-44-8                                                      | alkaloid | cell proliferation<br>inhibitor                        | human urine, butterfly<br>wing pigment                                                                  |
| 60 | 538985298 | 01501009 | 1R,9S-HYDRASTINE                | C21H21NO6    | 383.40 | 118-08-1                                                      | alkaloid | uterine hemostatic,<br>antiseptic                      | <i>Hydrastis canadensis</i>                                                                             |
| 61 | 1206023   | 01500872 | PALMATINE<br>CHLORIDE           | C21H22CINO4  | 387.87 | 10605-02-4                                                    | alkaloid | antibacterial,<br>antimalarial, uterine<br>contractant | <i>Jateorhiza palmata</i><br>( <i>Calumba</i> root)                                                     |
| 62 | 1105      | 01502020 | FOLIC ACID                      | C19H19N7O6   | 441.41 | 59-30-3                                                       | alkaloid | hematopoietic<br>vitamin                               | liver, kidney, green<br>plants and fungi                                                                |
| 63 | 522       | 01500758 | LOBELINE<br>HYDROCHLORIDE       | C22H28CINO2  | 373.93 | 90-69-7                                                       | alkaloid | antiasthmatic,<br>respiratory<br>stimulant             | <i>Lobelia</i> spp.                                                                                     |
| 64 | 538986204 | 00100520 | LUNARINE                        | C25H31N3O4   | 437.54 | 24185-51-1                                                    | alkaloid |                                                        | <i>Lunaria</i> spp.                                                                                     |
| 65 | 538986647 | 01505242 | LUPANINE<br>PERCHLORATE         | C15H25CIN2O5 | 348.83 | 550-90-3 (base)                                               | alkaloid |                                                        | <i>Lupinus</i> and <i>Cystisus</i><br>spp.                                                              |
| 66 | 538986644 | 00300548 | SPARTEINE SULFATE               | C15H28N2O4S  | 332.47 | 6160-12-9,<br>299-39-8<br>[anhydrous],<br>90-39-1 [sparteine] | alkaloid | oxytotic                                               | <i>Lupinus</i> spp. and other<br><i>Leguminosae</i>                                                     |
| 67 | 538986629 | 01505255 | HUPERZINE A                     | C15H18N2O    | 242.32 | 102518-79-6                                                   | alkaloid | anticholinesterase,<br>cognition enhancer              | <i>Lycopodium</i> spp.                                                                                  |

|    |           |          |                                |             |        |                                    |          |                                                     |                                                                          |
|----|-----------|----------|--------------------------------|-------------|--------|------------------------------------|----------|-----------------------------------------------------|--------------------------------------------------------------------------|
| 68 | 538977692 | 00100301 | TOMATIDINE<br>HYDROCHLORIDE    | C27H46ClNO2 | 452.13 | 69004-03-1                         | alkaloid |                                                     | <i>Lycopersicon and<br/>Solanum spp.</i>                                 |
| 69 | 538986185 | 02300329 | 1-METHYLXANTHINE               | C6H6N4O2    | 166.14 | 6136-37-4                          | alkaloid | diuretic, adenosine<br>antagonist                   | major component of<br>human urine                                        |
| 70 | 14        | 01500944 | CARNOSINE                      | C9H14N4O3   | 226.24 | 305-84-0                           | alkaloid |                                                     | mammalian skeletal<br>muscle                                             |
| 71 | 538977738 | 01600300 | CREATININE                     | C4H7N3O     | 113.12 | 60-27-5                            | alkaloid | metabolic enhancer                                  | metabolite in muscle<br>and urine; renal<br>metabolite                   |
| 72 | 538985634 | 01500208 | COTININE                       | C10H12N2O   | 176.22 | 5695-98-7, 486-56-6<br>[cotinine]  | alkaloid | antidepressant                                      | <i>Nicotiana tabacum</i>                                                 |
| 73 | 538977945 | 01503431 | CYTIDINE                       | C9H13N3O5   | 243.22 | 65-46-3                            | alkaloid |                                                     | nucleoside                                                               |
| 74 | 1204212   | 00100537 | SOLASODINE                     | C27H43NO2   | 413.65 | 126-17-0                           | alkaloid | antineoplastic,<br>antiinflammatory                 | numerous <i>Solanum<br/>spp.</i>                                         |
| 75 | 1201072   | 00100595 | COTARNINE<br>CHLORIDE          | C12H14ClNO3 | 255.70 | 10018-19-6, 82-54-2<br>[cotarnine] | alkaloid | vasoconstrictor                                     | <i>Papaver pseudo-orientale</i>                                          |
| 76 | 538985902 | 01501014 | HYDROCOTARNINE<br>HYDROBROMIDE | C12H16BrNO3 | 302.17 | 550-10-7                           | alkaloid | vasoconstrictor                                     | <i>Papaver somniferum</i>                                                |
| 77 | 538977938 | 01500754 | XANTHURENIC ACID               | C10H7NO4    | 205.17 | 59-00-7                            | alkaloid | caspase activator,<br>guanylyl cyclase<br>stimulant | pathological<br>metabolite of<br>tryptophan and<br>kynurenine            |
| 78 | 1206021   | 01500867 | HARMINE                        | C13H12N2O   | 212.25 | 442-51-3                           | alkaloid | antiparkinsonian,<br>CNS stimulant                  | <i>Peganium harmala</i>                                                  |
| 79 | 538976359 | 01500864 | HARMALINE                      | C13H14N2O   | 214.27 | 304-21-2                           | alkaloid | CNS stimulant,<br>antiparkinsonian<br>agent         | <i>Peganium harmala</i>                                                  |
| 80 | 1206019   | 01500865 | HARMALOL<br>HYDROCHLORIDE      | C12H13ClN2O | 236.70 | 6028-07-5                          | alkaloid | anthelmintic,<br>narcotic agent                     | <i>Peganium harmala</i>                                                  |
| 81 | 1206017   | 01500862 | BOLDINE                        | C19H21NO4   | 327.38 | 476-70-0                           | alkaloid |                                                     | <i>Peumus boldus</i>                                                     |
| 82 | 538977582 | 00200191 | METHYL<br>COCLAURINE           | C18H21NO3   | 299.37 |                                    | alkaloid |                                                     | <i>Phyllica rogersii</i>                                                 |
| 83 | 296       | 01500690 | MELATONIN                      | C13H16N2O2  | 232.28 | 73-31-4                            | alkaloid | sleep induction,<br>modifies circadian<br>rhythm    | pineal gland                                                             |
| 84 | 538987990 | 01505135 | PIPLARTINE                     | C17H19NO5   | 317.34 | 20069-09-4                         | alkaloid | anti-asthma,<br>antibronchitis                      | <i>Piper spp.</i>                                                        |
| 85 | 538977519 | 00300553 | PELLETIERINE<br>HYDROCHLORIDE  | C8H16ClNO   | 177.68 |                                    | alkaloid |                                                     | <i>Punica granatum</i>                                                   |
| 86 | 538976366 | 01502227 | CADAVERINE<br>TARTRATE         | C7H16N2O6   | 224.22 | 462-94-2(base)                     | alkaloid |                                                     | putrifaction of lysine;<br>sectrtrion of the fox<br><i>Vulpes vulpes</i> |

|     |           |          |                                 |              |        |                                  |          |                                                                                                                   |                                                                                                             |
|-----|-----------|----------|---------------------------------|--------------|--------|----------------------------------|----------|-------------------------------------------------------------------------------------------------------------------|-------------------------------------------------------------------------------------------------------------|
| 87  | 425       | 01500526 | RESERPINE                       | C33H40N2O9   | 608.69 | 50-55-5                          | alkaloid | antihypertensive<br>antiarrhythmic<br>(Class Ia): inhibits<br>glucose uptake by<br>mitochondria, &<br>PAF blocker | <i>Rauwolfia serpentina</i>                                                                                 |
| 88  | 1200504   | 01500656 | AJMALINE                        | C20H26N2O2   | 326.44 | 4360-17-7                        | alkaloid | alpha2 adrenergic<br>antagonist                                                                                   | <i>Rauwolfia</i> spp.,<br><i>Melodinus balansae</i> ,<br><i>Tonduzia longifolia</i>                         |
| 89  | 437       | 01503639 | RAUWOLSCINE<br>HYDROCHLORIDE    | C21H27ClN2O3 | 390.91 |                                  | alkaloid | adrenergic agonist                                                                                                | <i>Rauwolfia</i> ,<br><i>Aspidosperma</i> and <i>Vinca</i><br>spp.                                          |
| 90  | 350       | 01500639 | OCTOPAMINE<br>HYDROCHLORIDE     | C8H12ClNO2   | 189.64 | 104-14-3                         | alkaloid | antihypertensive,<br>antihistamine                                                                                | salivary glands of<br><i>Octopus vulgaris</i> ; also<br><i>Capsicum frutescens</i> &<br><i>Cyperus</i> spp. |
| 91  | 538978115 | 01504025 | SALSOLINE                       | C11H15NO2    | 193.25 | 89-31-6                          | alkaloid | antihypertensive                                                                                                  | <i>Salsola richteri</i>                                                                                     |
| 92  | 538978112 | 01504022 | SALSOLIDINE                     | C12H17NO2    | 207.27 | 493-48-1                         | alkaloid | antineoplastic,<br>antiplatelet agent                                                                             | <i>Salsola Richteri</i>                                                                                     |
| 93  | 538977640 | 00310035 | SANGUINARINE<br>SULFATE         | C20H15NO8S   | 429.41 | 5578-73-4                        | alkaloid | anticholinergic,<br>antispasmodic                                                                                 | <i>Sanguinaria canadensis</i>                                                                               |
| 94  | 1201027   | 00300047 | ANISODAMINE                     | C17H23NO4    | 305.38 | 17659-49-3                       | alkaloid | GABAA receptor<br>blocker, CNS<br>stimulant                                                                       | <i>Scopolia tanguticus</i>                                                                                  |
| 95  | 538986752 | 01505334 | SECURININE                      | C13H15NO2    | 217.27 | 5610-40-2                        | alkaloid | cytostatic,<br>intercalating agent                                                                                | <i>Securinega</i> spp. and<br><i>Phyllanthus discoides</i>                                                  |
| 96  | 1200695   | 01500861 | CORALYNE<br>CHLORIDE            | C22H22ClNO4  | 399.88 | 38989-38-7                       | alkaloid | antineoplastic,<br>hepatoprotectant,<br>radioprotective                                                           | Stephania spp.                                                                                              |
| 97  | 538986741 | 01505322 | CEPHARANTHINE                   | C37H38N2O6   | 606.73 | 481-49-2                         | alkaloid | antiinflammatory,<br>respiratory<br>stimulant                                                                     | striated muscle, liver;<br>also in <i>Pisum sativum</i>                                                     |
| 98  | 78        | 01500624 | CARNITINE (dl)<br>HYDROCHLORIDE | C7H16ClNO3   | 197.66 | 461-06-3                         | alkaloid | central stimulant                                                                                                 | <i>Strychnos nux-vomica</i><br>and other <i>Strychnos</i> spp.                                              |
| 99  | 442       | 01500651 | STRYCHNINE                      | C21H22N2O2   | 334.42 | 57-24-9                          | alkaloid | central stimulant                                                                                                 | <i>Strychnos nux-vomica</i>                                                                                 |
| 100 | 1206010   | 01500822 | BRUCINE                         | C23H26N2O4   | 394.47 | 4845-99-2, 357-57-3<br>[brucine] | alkaloid | antiinflammatory,<br>respiratory<br>stimulant                                                                     | <i>Thermopsis lanceolata</i>                                                                                |
| 101 | 538978116 | 01504027 | CYTISINE                        | C11H14N2O    | 190.25 | 485-35-8                         | alkaloid | antihyperglycemic                                                                                                 | <i>Trigonella</i><br><i>foenumgraecum</i> and in<br>coffee beans                                            |
| 102 | 1207071   | 01500880 | TRIGONELLINE                    | C7H7NO2      | 137.14 | 535-83-1                         | alkaloid |                                                                                                                   |                                                                                                             |

|     |           |          |                              |                                                                               |        |                                                         |          |                                                                   |                                                                                                                                                  |
|-----|-----------|----------|------------------------------|-------------------------------------------------------------------------------|--------|---------------------------------------------------------|----------|-------------------------------------------------------------------|--------------------------------------------------------------------------------------------------------------------------------------------------|
| 103 | 1200657   | 01500272 | EMETINE                      | C <sub>29</sub> H <sub>42</sub> Cl <sub>2</sub> N <sub>2</sub> O <sub>4</sub> | 553.58 | 316-42-7, 483-18-1<br>[emetine]                         | alkaloid | inhibits RNA, DNA<br>and protein<br>synthesis                     | <i>Uragoga ipecacuanha</i>                                                                                                                       |
| 104 | 1207069   | 01500877 | KYNURAMINE                   | C <sub>9</sub> H <sub>12</sub> N <sub>2</sub> O                               | 164.21 |                                                         | alkaloid |                                                                   | urine of various<br>animals                                                                                                                      |
| 105 | 538986698 | 00240422 | 2-ACETYLPIRROLE              | C <sub>6</sub> H <sub>7</sub> NO                                              | 109.13 | 1072-83-9                                               | alkaloid | hepatoprotectant,<br>organoleptic                                 | <i>Valeriana officinalis</i> ,<br><i>Camellia thea</i> , <i>Paeonia<br/>moutan</i> , <i>Lycium<br/>chinense</i> , <i>Streptomyces<br/>A-5071</i> |
| 106 | 538977757 | 01503815 | CEVADINE                     | C <sub>32</sub> H <sub>49</sub> NO <sub>9</sub>                               | 591.75 | 62-59-9                                                 | alkaloid | antihypertensive                                                  | <i>Veratrum alba</i> ; contains<br>20% veratridine                                                                                               |
| 107 | 538977679 | 01503662 | VERATRIDINE                  | C <sub>37</sub> H <sub>53</sub> NO <sub>12</sub>                              | 703.83 | 71-62-5                                                 | alkaloid | antihypertensive                                                  | <i>Veratrum alba</i>                                                                                                                             |
| 108 | 538977926 | 01500647 | VINCAMINE                    | C <sub>21</sub> H <sub>26</sub> N <sub>2</sub> O <sub>3</sub>                 | 354.45 | 1617-90-9                                               | alkaloid | vasodilator                                                       | <i>Vinca minor</i>                                                                                                                               |
| 109 | 538986026 | 01500611 | VINBLASTINE<br>SULFATE       | C <sub>46</sub> H <sub>60</sub> N <sub>4</sub> O <sub>13</sub> S              | 909.07 | 143-67-9, 865-21-4<br>[vinblastine]                     | alkaloid | antineoplastic,<br>spindle poison<br>CNS                          | <i>Vinca rosea</i>                                                                                                                               |
| 110 | 538988039 | 01505004 | VINDOLINE                    | C <sub>25</sub> H <sub>32</sub> N <sub>2</sub> O <sub>6</sub>                 | 456.54 | 2182-14-1                                               | alkaloid | stimulant/depressant;<br>antihyperglycaemic                       | <i>Vinca rosea</i> , <i>V pusilla</i>                                                                                                            |
| 111 | 538977628 | 00310023 | HYPOXANTHINE                 | C <sub>5</sub> H <sub>4</sub> N <sub>4</sub> O                                | 136.11 | 68-94-0                                                 | alkaloid |                                                                   | widely distributed in<br>the plant and animal<br>kingdom                                                                                         |
| 112 | 538986186 | 02300330 | PTERIN-6-CARBOXYLI<br>C ACID | C <sub>7</sub> H <sub>5</sub> N <sub>5</sub> O <sub>3</sub>                   | 207.15 |                                                         | alkaloid |                                                                   | widespread in animal<br>kingdom; metabolite<br>of pteroylglutamate                                                                               |
| 113 | 538977629 | 01503007 | BETAINE<br>HYDROCHLORIDE     | C <sub>5</sub> H <sub>12</sub> ClNO <sub>2</sub>                              | 153.61 | 590-46-5, 141-58-2<br>[replaced],<br>107-43-7 [betaine] | alkaloid | antiartherosclerotic,<br>hypolipaeic,<br>hepatoprotectant         | widespread in fungi<br>and plants                                                                                                                |
| 114 | 538986432 | 00500071 | LYCOPODINE<br>PERCHLORATE    | C <sub>16</sub> H <sub>26</sub> ClNO <sub>5</sub>                             | 347.84 |                                                         | alkaloid |                                                                   | widespread in<br><i>Lycopodium</i> spp.                                                                                                          |
| 115 | 1207068   | 01500874 | LEUCOPTERIN                  | C <sub>6</sub> H <sub>5</sub> N <sub>5</sub> O <sub>3</sub>                   | 195.14 |                                                         | alkaloid |                                                                   | wing pigment of many<br>butterflies, e.g., <i>Pieris<br/>brassicae</i> and<br><i>Gonopteryx rhanni</i>                                           |
| 116 | 1048      | 01500764 | KINETIN                      | C <sub>10</sub> H <sub>9</sub> N <sub>5</sub> O                               | 215.22 | 525-79-1                                                | alkaloid | auxin, plant growth<br>regulator, plant cell<br>division promotor | yeast                                                                                                                                            |
| 117 | 538986097 | 01504176 | RHETSININE                   | C <sub>19</sub> H <sub>17</sub> N <sub>3</sub> O <sub>2</sub>                 | 319.37 | 526-43-2                                                | alkaloid |                                                                   | <i>Zanthoxylum rhetsa</i> ,<br><i>Evodia rutaecarpa</i>                                                                                          |
| 118 | 538977605 | 00310001 | ACONITIC ACID                | C <sub>6</sub> H <sub>6</sub> O <sub>6</sub>                                  | 174.11 | 585-84-2                                                | alkane   |                                                                   | <i>Aconitum</i> and <i>Achillea<br/>spp.</i>                                                                                                     |
| 119 | 538988055 | 01505190 | L(+/-)-ALLIIN                | C <sub>6</sub> H <sub>11</sub> NO <sub>3</sub> S                              | 177.22 | 556-27-4(-)                                             | alkane   | antibacterial,                                                    | <i>Allium</i> spp.                                                                                                                               |

|     |           |          |                                        |             |        |            |            |                                                                                                        |                                                                            |
|-----|-----------|----------|----------------------------------------|-------------|--------|------------|------------|--------------------------------------------------------------------------------------------------------|----------------------------------------------------------------------------|
|     |           |          |                                        |             |        |            |            | antioxidant                                                                                            |                                                                            |
| 120 | 538987961 | 01505014 | DIALLYL TRISULFIDE                     | C6H10S3     | 178.34 | 2050-87-5  | alkane     | antineoplastic                                                                                         | <i>Allium</i> spp.                                                         |
| 121 | 538988028 | 01505174 | GARLICIN                               | C6H10S2     | 146.27 | 2179-57-9  | alkane     | antineoplastic,<br>antibacterial,<br>apoptosis inducer,<br>insecticide                                 | <i>Allium</i> spp.,<br><i>Descurainia sophia</i>                           |
| 122 | 538986706 | 01505293 | DIALLYL SULFIDE                        | C6H10S      | 114.21 | 592-88-1   | alkane     | antibacterial,<br>antifungal,<br>antineoplastic,<br>antihypercholesterol<br>aemic,<br>hepatoprotectant | <i>Allium</i> spp., <i>Wasabia<br/>japonica</i>                            |
| 123 | 538986148 | 01504206 | BOVINOCIDIN<br>(3-nitropropionic acid) | C3H5NO4     | 119.08 | 504-88-1   | alkane     | antineoplastic                                                                                         | <i>Aspergillus</i> ,<br><i>Streptomyces</i> spp. &<br>other microorganisms |
| 124 | 538985351 | 01501193 | ERYSOLIN                               | C6H11NO2S2  | 193.29 | 504-84-7   | alkane     | antiproliferative                                                                                      | cabbage                                                                    |
| 125 | 538985941 | 00201227 | NONIC ACID                             | C9H16O4     | 188.23 |            | alkane     |                                                                                                        | hydrolysis product of<br>actinonin                                         |
| 126 | 538986493 | 01504910 | DIHYDROJASMONIC<br>ACID, METHYL ESTER  | C13H22O3    | 226.32 | 24851-98-7 | alkane     | plant growth<br>regulator                                                                              | <i>Jasminium</i> spp. and<br><i>Vicia faba</i>                             |
| 127 | 538985923 | 01504104 | DIHYDROJASMONIC<br>ACID                | C12H20O3    | 212.29 | 98674-52-3 | alkane     | plant growth<br>regulator                                                                              | <i>Jasminium</i> spp. and<br><i>Vicia faba</i>                             |
| 128 | 538977946 | 01800177 | PENICILLIC ACID                        | C8H10O4     | 170.17 |            | alkane     | antibacterial                                                                                          | <i>Penicillium</i> spp.                                                    |
| 129 | 44        | 01500648 | AZELAIC ACID                           | C9H16O4     | 188.23 | 123-99-9   | alkane     | antiacne,<br>antiproliferative<br>agent                                                                | rancid fats and<br><i>Lycopodium</i> spp.                                  |
| 130 | 538976370 | 01502236 | ABRINE (L)                             | C12H14N2O2  | 218.26 | 526-31-8   | amino acid | insecticide,<br>antiinflammatory,<br>antiophthalmic                                                    | <i>Abrus pectorius</i>                                                     |
| 131 | 538977386 | 01502183 | DIPROTIN A                             | C17H31N3O4  | 341.45 | 90614-48-5 | amino acid | dipeptidyl peptidase<br>inhibitor,<br>HIV inhibitor                                                    | <i>Bacillus cereus</i>                                                     |
| 132 | 1205994   | 01500833 | CANAVANINE                             | C5H12N4O3   | 176.18 | 543-38-4   | amino acid | NO synthase<br>inhibitor                                                                               | <i>Canavalia ensiformis</i>                                                |
| 133 | 1210710   | 01500855 | CITRULLINE                             | C6H13N3O3   | 175.19 | 627-77-0   | amino acid |                                                                                                        | <i>Citrullis vulgaris</i> and the<br>alga <i>Grateloupia filicina</i>      |
| 134 | 538978174 | 02300228 | KAINIC ACID                            | C10H15NO4   | 213.24 | 487-79-6   | amino acid | glutamate receptor<br>agonist,<br>anthelmintic                                                         | <i>Digenia simplex</i>                                                     |
| 135 | 538977613 | 00310008 | DJENKOLIC ACID                         | C7H14N2O4S2 | 254.33 | 498-59-9   | amino acid |                                                                                                        | djenkol bean<br>( <i>Pithecolobium lobatum</i> )                           |
| 136 | 1207070   | 01500879 | KYNURENINE                             | C10H12N2O3  | 208.22 |            | amino acid |                                                                                                        | mamalian urine                                                             |

|     |           |          |                                                |               |        |                                  |                |                                        |                                                                                                       |
|-----|-----------|----------|------------------------------------------------|---------------|--------|----------------------------------|----------------|----------------------------------------|-------------------------------------------------------------------------------------------------------|
| 137 | 538977498 | 01502262 | NOPALINE                                       | C11H20N4O6    | 304.31 |                                  | amino acid     |                                        | metabolite of plant tumors                                                                            |
| 138 | 1206022   | 01500869 | MIMOSINE                                       | C8H10N2O4     | 198.18 |                                  | amino acid     | depilatory agent                       | <i>Mimosa and Leucena</i> spp.                                                                        |
| 139 | 1205988   | 01500711 | ALBIZZIINE                                     | C4H9N3O3      | 147.13 | 585-23-9                         | amino acid     | glutamase inhibitor                    | <i>Mimosaceae</i>                                                                                     |
| 140 | 538986458 | 01400136 | N-METHYLISOLEUCINE                             | C7H15NO2      | 145.20 | 5125-98-8                        | amino acid     |                                        | <i>Phaseolus vulgaris</i>                                                                             |
| 141 | 538977944 | 01502248 | GLUTATHIONE                                    | C10H17N3O6S   | 307.33 | 70-18-8                          | amino acid     | antioxidant                            | plant and animal tissue                                                                               |
| 142 | 538986435 | 00501000 | D,L-threo-3-HYDROXYASPARTIC ACID               | C4H7NO5       | 149.10 |                                  | amino acid     | L-aspartate beta-carboxylase inhibitor | <i>Streptomyces</i> spp.,<br><i>Arthrinium phaeospermum</i> ,<br><i>Dactylosporangium aurantiacum</i> |
| 143 | 538986628 | 01505254 | THEANINE                                       | C7H14N2O3     | 174.20 | 3081-61-6                        | amino acid     |                                        | <i>Thea sinensis</i>                                                                                  |
| 144 | 538986745 | 01505302 | GENETICIN                                      | C20H44N4O18S2 | 692.72 | 108321-42-2,<br>49863-47-0(base) | aminoglycoside | antibacterial                          | <i>Micromonospora</i> spp.                                                                            |
| 145 | 538985471 | 00200022 | AKLAVINE HYDROCHLORIDE                         | C30H36ClNO10  | 606.08 | 60504-57-6 (aklavine)            | anthraquinone  | antibacterial, antineoplastic          | <i>Actinomyces</i> spp.                                                                               |
| 146 | 538977544 | 00300545 | CHRYSOPHANOL                                   | C15H10O4      | 254.24 | 481-74-3                         | anthraquinone  |                                        | <i>Cassia and Rumex</i> spp.                                                                          |
| 147 | 1210682   | 01500817 | CARMINIC ACID                                  | C22H20O14     | 508.40 | 1260-17-9                        | anthraquinone  |                                        | <i>Dactylopius coccus</i> (cochineal)                                                                 |
| 148 | 538978228 | 01504060 | EMODIC ACID                                    | C15H8O7       | 300.23 | 578-45-5                         | anthraquinone  | cathartic, purgative                   | <i>Penicillium cyclopium</i> ,<br><i>Calopaca ferruginea</i>                                          |
| 149 | 538986510 | 00211473 | 1,4,5,8-TETRAHYDROXY-2,6-DIMETHYLANTHROQUINONE | C16H12O6      | 300.27 | 19079-10-8                       | anthraquinone  |                                        | <i>Phoma terrestris</i> and<br><i>Curvularia lunata</i>                                               |
| 150 | 538986710 | 01505300 | PURPURIN                                       | C14H8O5       | 256.22 | 81-54-9                          | anthraquinone  | xanthin oxidase inhibitor, irritant    | <i>Rubia and Gallium</i> spp.                                                                         |
| 151 | 538977517 | 00210850 | ALIZARIN                                       | C14H8O4       | 240.22 | 72-48-0                          | anthraquinone  | antimutagen                            | <i>Rubia tinctorum</i>                                                                                |
| 152 | 538986567 | 00201606 | RUTILANTINONE                                  | C22H20O9      | 428.40 | 21288-61-9                       | anthraquinone  | coccidiostat                           | <i>Streptomyces</i> species                                                                           |
| 153 | 538986509 | 00201604 | PYRROMYCIN                                     | C30H35NO11    | 585.61 | 668-17-7                         | anthraquinone  | antibacterial                          | <i>Streptomyces</i> spp.                                                                              |
| 154 | 538978137 | 01504070 | PHYSCION                                       | C16H12O5      | 284.27 | 521-61-9                         | anthraquinone  | antibacterial, cathartic               | <i>Xanthoria lichens</i> ,<br><i>Rumex</i> spp. and various<br><i>Aspergillus</i> spp.                |
| 155 | 538985513 | 01504078 | SENNOSIDE A                                    | C42H38O20     | 862.76 | 81-27-6                          | anthraquinone  | cathartic                              | <i>Cassia &amp; Rheum</i> spp.                                                                        |
| 156 | 538986501 | 00210925 | METHYLORSELLINATE                              | C9H10O4       | 182.18 | 3187-58-4                        | aromatic       |                                        | lichens and lichen acids                                                                              |
| 157 | 538988034 | 00200446 | METHYLXANTHOXYLIN                              | C11H14O4      | 210.23 | 23121-32-6                       | aromatic       |                                        | <i>Acradenia franklinii</i> ,<br><i>Eugenia jambolana</i>                                             |
| 158 | 538986177 | 00210568 | COUMARINIC ACID METHYL ETHER                   | C10H10O3      | 178.19 |                                  | aromatic       |                                        | aglycone <i>Melilotus alba</i> ,<br><i>Dipteryx odorata</i>                                           |

|     |           |          |                                                   |           |        |            |          |                                                                                                                                                 |
|-----|-----------|----------|---------------------------------------------------|-----------|--------|------------|----------|-------------------------------------------------------------------------------------------------------------------------------------------------|
| 159 | 538986457 | 01400131 | HAEMATOMMIC ACID                                  | C9H8O5    | 196.16 | 479-25-4   | aromatic | <i>Alectoria</i> spp.,<br><i>Haematomma</i> spp. and<br><i>Lethariella</i> spp.                                                                 |
| 160 | 538986695 | 00231070 | p-HYDROXYCINNAMALDEHYDE                           | C9H8O2    | 148.16 | 2538-87-6  | aromatic | <i>Alpinia galanga</i> ,<br><i>Sarcophyte sanguinea</i>                                                                                         |
| 161 | 538977831 | 01503705 | ANETHOLE                                          | C10H12O   | 148.21 | 4180-23-8  | aromatic | expectorant, gastric<br>stimulant,<br>insecticide<br>anise, fennel and other<br>plant oils                                                      |
| 162 | 538977595 | 00200110 | ANTIAROL                                          | C9H12O4   | 184.19 | 642-71-7   | aromatic | <i>Antiaris toxicaria</i>                                                                                                                       |
| 163 | 538986090 | 01504180 | ASARININ (-)                                      | C20H18O6  | 354.36 | 13079-95-3 | aromatic | antibacterial<br>(tuberculostatic)<br><i>Asarum &amp; Xanthoxylum</i><br>spp.                                                                   |
| 164 | 538977600 | 00210072 | METHYLORSELLINIC ACID, ETHYL ESTER                | C11H14O4  | 210.23 |            | aromatic | <i>Aspergillus silvaticus</i>                                                                                                                   |
| 165 | 538986015 | 00200640 | 3-METHYLORSELLINIC ACID                           | C9H10O4   | 182.18 | 4707-46-4  | aromatic | <i>Aspergillus terreus</i>                                                                                                                      |
| 166 | 538985933 | 00211126 | DIPHENYLUREA                                      | C13H12N2O | 212.25 | 102-07-8   | aromatic | coconut milk                                                                                                                                    |
| 167 | 538985272 | 01500296 | EUGENOL                                           | C10H12O2  | 164.21 | 97-53-0    | aromatic | analgesic (topical),<br>antiseptic,<br>antifungal<br>common in plant<br>essential oils                                                          |
| 168 | 538976323 | 00300001 | ORSELLINIC ACID                                   | C8H8O4    | 168.15 | 480-64-8   | aromatic | common lichen<br>constituent                                                                                                                    |
| 169 | 538986549 | 00290032 | SINAPIC ACID METHYL ETHER                         | C12H14O5  | 238.24 | 90-50-6    | aromatic | common plant<br>constituent                                                                                                                     |
| 170 | 538977663 | 01505345 | CURCUMIN                                          | C21H20O6  | 368.39 | 458-37-7   | aromatic | antiedemic,<br>antiinflammatory,<br>bile stimulant;<br>antibacterial,<br>antifungal,<br>lipo/cyclooxygenase<br>inhibitor<br><i>Curcuma</i> spp. |
| 171 | 538986377 | 01400164 | 2-HYDROXY-3,4-DIMETHOXYBENZOIC ACID               | C9H10O5   | 198.18 |            | aromatic | prostaglandin<br>synthetase inhibitor<br><i>Dalbergia odorifera</i>                                                                             |
| 172 | 538977799 | 00211458 | 3,4,5-TRIMETHOXYCINNAMALDEHYDE                    | C12H14O4  | 222.24 |            | aromatic | <i>Dalbergia spruceana</i>                                                                                                                      |
| 173 | 538986420 | 00200208 | ASARYLALDEHYDE                                    | C10H12O4  | 196.20 | 4460-86-0  | aromatic | fly attractant<br><i>Daucus carota</i> , <i>Acorus calamus</i> ,<br><i>Asarum europaeum</i>                                                     |
| 174 | 538978232 | 00210599 | 2,5-DIHYDROXY-3,4-DIMETHOXY-4'-ETHOXYBENZOPHENONE | C17H18O6  | 318.33 |            | aromatic | derivative                                                                                                                                      |
| 175 | 538977911 | 00300157 | EUGENYL BENZOATE                                  | C17H16O3  | 268.32 |            | aromatic | derivative                                                                                                                                      |
| 176 | 538985348 | 00300423 | DIFUCOL                                           | C18H22O6  | 334.37 | 14262-07-8 | aromatic | derivative                                                                                                                                      |



| HEXAMETHYL ETHER |           |          |                             |          |        |            |          |                                                         |                                                        |
|------------------|-----------|----------|-----------------------------|----------|--------|------------|----------|---------------------------------------------------------|--------------------------------------------------------|
| 177              | 538987953 | 01505006 | DIHYDROMYRISTICIN           | C11H14O3 | 194.23 | 607-91-0   | aromatic | GSH transferase inducer                                 | derivative; myristicin                                 |
| 178              | 538985978 | 00330085 | 4-NONYLPHENOL               | C15H24O  | 220.36 | 25154-52-3 | aromatic | weevil pheromone, shows estrogenic activity             | elephant secretant                                     |
| 179              | 538986681 | 00212061 | PYROCATECHUIC ACID          | C7H6O4   | 154.12 | 303-38-8   | aromatic | antioxidant                                             | <i>Erythraea centaurium</i> ,<br><i>Gentiana lutea</i> |
| 180              | 538978056 | 00210752 | EUDESMIC ACID               | C10H12O5 | 212.20 | 118-41-2   | aromatic |                                                         | <i>eucalyptus oil</i>                                  |
| 181              | 538986375 | 00240740 | 4-ACETOXYPHENOL             | C8H8O3   | 152.15 | 3233-32-7  | aromatic | antioxidant                                             | <i>Ferulago aucheri</i> , <i>Salvia yosgadensis</i>    |
| 182              | 3553      | 00201466 | MANDELIC ACID, METHYL ESTER | C9H10O3  | 166.18 |            | aromatic |                                                         | free acid found in <i>Poria</i> spp.                   |
| 183              | 538978109 | 01504019 | GOSSYPOL                    | C30H30O8 | 518.57 | 303-45-7   | aromatic | antispermatogenic, antineoplastic, antiHIV              | <i>Gossypium</i> spp.                                  |
| 184              | 538986164 | 01600964 | N-METHYLANTHRANILIC ACID    | C8H9NO2  | 151.17 | 119-68-6   | aromatic |                                                         | grapefruit peel oil                                    |
| 185              | 538977564 | 00300533 | ISOSAFROLE                  | C10H10O2 | 162.19 | 120-58-1   | aromatic |                                                         | <i>Illicium religiosum</i>                             |
| 186              | 538978054 | 00210369 | GALLIC ACID                 | C7H6O5   | 170.12 | 149-91-7   | aromatic | antineoplastic, astringent, antibacterial               | insect galls                                           |
| 187              | 1210756   | 01502206 | NORDIHYDROGUARETIC ACID     | C18H22O4 | 302.37 |            | aromatic | lipoxigenase inhibitor, antioxidant                     | <i>Larrea divaricata</i>                               |
| 188              | 538986507 | 00211009 | ETHYL EVERNINATE            | C11H14O4 | 210.23 | 6110-36-7  | aromatic |                                                         | lichen acids                                           |
| 189              | 538986505 | 00210924 | METHYL EVERNINATE           | C10H12O4 | 196.20 | 520-43-4   | aromatic |                                                         | lichens and lichen acids                               |
| 190              | 538977966 | 01503992 | CONIFERYL ALCOHOL           | C9H10O3  | 166.18 | 458-35-5   | aromatic |                                                         | lignan product; common in plants as glycosides         |
| 191              | 538986696 | 00231074 | o-VERATRALDEHYDE            | C9H10O3  | 166.18 | 86-51-1    | aromatic |                                                         | <i>Machaerium kuhlmannii</i>                           |
| 192              | 538986157 | 01600919 | 3-METHOXYCATECHOL           | C7H8O3   | 140.14 | 934-00-9   | aromatic |                                                         | <i>Machaerium kuhlmannii</i>                           |
| 193              | 1205857   | 00300146 | VULPINIC ACID               | C19H14O5 | 322.32 | 521-52-8   | aromatic | antiinflammatory, antibacterial, plant growth inhibitor | numerous lichens, e.g. <i>Letharia vulpina</i>         |
| 194              | 538987939 | 01505117 | ESTRAGOLE                   | C10H12O  | 148.21 | 140-67-0   | aromatic | insect attractant, skin irritant, carcinogen            | numerous plant essential oils                          |
| 195              | 538977558 | 00201727 | EVERNINIC ACID              | C8H8O5   | 184.15 | 570-10-5   | aromatic |                                                         | oak moss lichen                                        |
| 196              | 538985974 | 00210800 | CHLOROGENIC ACID            | C16H18O9 | 354.32 | 327-97-9   | aromatic | antioxidant, free                                       | occurence in many                                      |

|     |           |          |                                |           |         |            |          | radical scavenger                                                     | plants                                                                                                                                                                                                                                                       |
|-----|-----------|----------|--------------------------------|-----------|---------|------------|----------|-----------------------------------------------------------------------|--------------------------------------------------------------------------------------------------------------------------------------------------------------------------------------------------------------------------------------------------------------|
| 197 | 538986280 | 01601021 | PAEONOL                        | C9H10O3   | 166.18  | 552-41-0   | aromatic | antibacterial                                                         | <i>Paeonia montan</i> ,<br><i>Xanthorrhoea spp.</i>                                                                                                                                                                                                          |
| 198 | 538986459 | 01400156 | ISOPEONOL                      | C9H10O3   | 166.18  | 493-33-4   | aromatic |                                                                       | <i>Paeonia spp.</i>                                                                                                                                                                                                                                          |
| 199 | 538986159 | 00211066 | 2-METHOXYRESORCINOL            | C7H8O3    | 140.14  | 29267-67-2 | aromatic |                                                                       | <i>Peltophorum africanum</i>                                                                                                                                                                                                                                 |
| 200 | 4         | 00100616 | ANGOLENSIN (R)                 | C16H16O4  | 272.30  | 4842-48-2  | aromatic |                                                                       | <i>Pericopsis and Pterocarpus spp.</i>                                                                                                                                                                                                                       |
| 201 | 538986498 | 00390001 | APIOLE                         | C12H14O4  | 222.24  | 523-80-8   | aromatic | antipyretic, diuretic, insecticide                                    | <i>Petroselinum spp.</i> ,<br><i>Anethum graveolens</i>                                                                                                                                                                                                      |
| 202 | 538987985 | 01505130 | 3,4-DIMETHOXYCINNAMIC ACID     | C11H12O4  | 208.22  | 2316-26-9  | aromatic |                                                                       | <i>Piper methysticum</i> ,<br><i>Veronica virginica</i>                                                                                                                                                                                                      |
| 203 | 538986175 | 00210567 | DIMETHYLCAFFEIC ACID           | C11H12O4  | 208.22  | 14737-89-4 | aromatic |                                                                       | <i>Piper methysticum</i> ,<br><i>Veronica virginica</i>                                                                                                                                                                                                      |
| 204 | 538986569 | 00200427 | PISCIDIC ACID                  | C11H12O7  | 256.21  | 35388-57-9 | aromatic |                                                                       | <i>Piscidia piscipula</i>                                                                                                                                                                                                                                    |
| 205 | 538985924 | 01504105 | TANNIC ACID                    | C76H52O46 | 1701.23 | 1401-55-4  | aromatic | nonspecific enzyme/receptor blocker                                   | principal constituent of tree galls, esp <i>Quercus spp.</i> ;                                                                                                                                                                                               |
| 206 | 538986565 | 00203008 | JUAREZIC ACID                  | C11H10O2  | 174.20  | 1552-94-9  | aromatic |                                                                       | <i>propolis and Populus spp.</i>                                                                                                                                                                                                                             |
| 207 | 538986777 | 01505349 | 4-O-METHYLPHLORACETOPHENONE    | C9H10O4   | 182.18  | 7507-89-3  | aromatic | antifungal                                                            | <i>Prunus domestica</i>                                                                                                                                                                                                                                      |
| 208 | 538986776 | 00300604 | PHLORACETOPHENONE              | C8H8O4    | 168.15  | 480-66-0   | aromatic |                                                                       | <i>Prunus domestica</i>                                                                                                                                                                                                                                      |
| 209 | 717       | 00200002 | ORSELLINIC ACID, ETHYL ESTER   | C10H12O4  | 196.20  | 2524-37-0  | aromatic |                                                                       | Roccella and Lecanora lichens                                                                                                                                                                                                                                |
| 210 | 538977503 | 00205077 | ISOFERULIC ACID                | C10H10O4  | 194.19  |            | aromatic |                                                                       | roots of <i>Cimicifuga racemosa</i>                                                                                                                                                                                                                          |
| 211 | 1210900   | 01502094 | ROSMARINIC ACID                | C18H16O8  | 360.32  | 537-15-5   | aromatic | antiinflammatory, antithrombotic, antiplatelet, cytostatic, antiviral | <i>Rosmarinus officinalis</i> ,<br><i>Melissa officinalis</i> ,<br><i>Momordica balsamina</i> ,<br><i>Mentha piperita</i> , <i>Salvia officinalis</i> , <i>Teucrium scorodonia</i> , <i>Sanicula europaea</i> , <i>Coleus blumei</i> ,<br><i>Thymus spp.</i> |
| 212 | 538977524 | 01503620 | SAFROLE                        | C10H10O2  | 162.19  | 94-59-7    | aromatic | anesthetic (topical) and antiseptic, pediculicide                     | <i>sassafras officinale</i>                                                                                                                                                                                                                                  |
| 213 | 538977888 | 00100577 | SAFROLGLYCOL                   | C10H12O4  | 196.20  |            | aromatic |                                                                       | sassafras root                                                                                                                                                                                                                                               |
| 214 | 538986502 | 00206050 | ORSELLINIC ACID DIMETHYL ETHER | C10H12O4  | 196.20  | 3686-57-5  | aromatic |                                                                       | semisynthetic                                                                                                                                                                                                                                                |

|     |           |          |                                                       |           |        |            |                       |                                                       |                                                                                             |
|-----|-----------|----------|-------------------------------------------------------|-----------|--------|------------|-----------------------|-------------------------------------------------------|---------------------------------------------------------------------------------------------|
| 215 | 538977591 | 00200759 | IRETOL                                                | C7H8O4    | 156.14 |            | aromatic              |                                                       | semisynthetic                                                                               |
| 216 | 538986083 | 00300610 | ACETOSYRINGONE                                        | C10H12O4  | 196.20 | 2478-38-8  | aromatic              | insect attractant,<br>plant hormone                   | several commercial<br>woods                                                                 |
| 217 | 538988101 | 00212097 | ONONETIN                                              | C15H14O4  | 258.28 | 487-49-0   | aromatic              |                                                       | <i>Trifolium subterraneum</i>                                                               |
| 218 | 538986022 | 01503006 | BENZYL<br>ISOTHIOCYANATE                              | C8H7NS    | 149.22 | 622-78-6   | aromatic              | antineoplastic,<br>antibacterial,<br>antifungal       | <i>Tropaeolum majus</i> ,<br><i>Lepidium sativum</i> and<br>other <i>Cruciferae</i>         |
| 219 | 1206968   | 00205071 | HAEMATOMMIC<br>ACID, ETHYL ESTER                      | C11H12O5  | 224.22 | 39503-14-5 | aromatic              |                                                       | various lichens, e.g.,<br><i>Evernia</i> spp.,<br><i>Parmelia</i> spp.                      |
| 220 | 538985959 | 00212140 | VERATRIC ACID                                         | C9H10O4   | 182.18 | 93-07-2    | aromatic              |                                                       | <i>Verbascum thapsus</i> ,<br><i>Sabadilla officinalis</i> ,<br><i>Stephania abyssinica</i> |
| 221 | 538980168 | 00211307 | GENTISIC ACID                                         | C7H6O4    | 154.12 | 490-79-9   | aromatic              | analgesic,<br>antiinflammatory                        | widely distributed in<br>higher plants and<br><i>Penicillium</i> spp.                       |
| 222 | 538976400 | 01502245 | ELLAGIC ACID                                          | C14H6O8   | 302.20 | 476-66-4   | aromatic              | hemostatic,<br>antineoplastic,<br>antimutagenic       | widely distributed in<br>higher plants                                                      |
| 223 | 18        | 01501017 | FERULIC ACID                                          | C10H10O4  | 194.19 | 1135-24-6  | aromatic              | antineoplastic,<br>choleric, food<br>preservative     | widely distributed in<br>plants                                                             |
| 224 | 538977968 | 01503987 | CAFFEIC ACID                                          | C9H8O4    | 180.16 | 331-39-5   | aromatic              |                                                       | widespread in plants                                                                        |
| 225 | 538986158 | 00200441 | XANTHOXYLIN                                           | C10H12O4  | 196.20 | 90-24-4    | aromatic              |                                                       | <i>Xanthoxylum</i> spp.,<br><i>Artemisia brevifolia</i>                                     |
| 226 | 20        | 00300547 | PHLORIDZIN                                            | C21H24O10 | 436.42 | 60-81-1    | aromatic<br>glycoside | induces<br>experimental<br>glucosuria,<br>antifeedant | <i>Rosaceae</i> spp.                                                                        |
| 227 | 538977910 | 00300062 | METAMECONINE                                          | C10H10O4  | 194.19 |            | benzofuran            |                                                       | <i>Accacia crombei</i>                                                                      |
| 228 | 538977646 | 00310041 | VISNAGIN                                              | C13H10O4  | 230.22 | 82-57-5    | benzofuran            |                                                       | <i>Ammi visnaga</i>                                                                         |
| 229 | 1201361   | 00300007 | EUPARIN                                               | C13H12O3  | 216.24 | 532-48-9   | benzofuran            |                                                       | <i>Eupatorium maculatum</i>                                                                 |
| 230 | 538977947 | 00300147 | USNIC ACID                                            | C18H16O7  | 344.32 | 125-46-2   | benzofuran            | antibacterial                                         | <i>Usnea</i> , <i>Cladonia</i> and<br>other lichen spp.                                     |
| 231 | 538977961 | 00290030 | CEAROIN                                               | C14H12O4  | 244.25 | 52811-37-7 | benzophenone          |                                                       | <i>Dalbergia</i> spp.                                                                       |
| 232 | 538986779 | 00200425 | 2,3-DIHYDROXY-4-ME<br>THOXY-4'-ETHOXYBE<br>NZOPHENONE | C16H16O5  | 288.30 |            | benzophenone          |                                                       | derivative                                                                                  |
| 233 | 1210684   | 01500819 | BERGENIN                                              | C14H16O9  | 328.28 | 477-90-7   | benzopyran            |                                                       | <i>Bergenia</i> spp.                                                                        |
| 234 | 2571      | 00210201 | DIHYDROMUNDULO<br>NE                                  | C26H30O6  | 438.53 |            | benzopyran            |                                                       | borohydride reduction<br>of mundulone                                                       |
| 235 | 538978204 | 01504036 | 3-DESHYDROXYSAPP                                      | C19H22O5  | 330.38 |            | benzopyran            |                                                       | derivative                                                                                  |

| ANOL TRIMETHYL ETHER |           |          |                                       |               |        |            |               |                                                                                                                        |                                                                           |
|----------------------|-----------|----------|---------------------------------------|---------------|--------|------------|---------------|------------------------------------------------------------------------------------------------------------------------|---------------------------------------------------------------------------|
| 236                  | 1205854   | 00210203 | DIHYDROMUNDULET ONE                   | C25H28O6      | 424.50 |            | benzopyran    |                                                                                                                        | derivative                                                                |
| 237                  | 538986240 | 01600365 | SAPPANONE A TRIMETHYL ETHER           | C19H18O5      | 326.35 |            | benzopyran    |                                                                                                                        | derivative <i>Caesalpinia sappan</i>                                      |
| 238                  | 538986241 | 01600480 | TETRAHYDROSAPPANONE A TRIMETHYL ETHER | C19H22O5      | 330.38 |            | benzopyran    |                                                                                                                        | derivative <i>Caesalpinia sappan</i>                                      |
| 239                  | 538986239 | 01600587 | TUBAIC ACID                           | C12H12O4      | 220.23 | 25277-45-6 | benzopyran    |                                                                                                                        | <i>Derris elliptica</i> ;<br>also degradation product of rotenone.        |
| 240                  | 1205437   | 00300061 | EUPATORIOCHROME NE                    | C13H14O3      | 218.25 | 19013-03-7 | benzopyran    | antifungal                                                                                                             | <i>Eupatorium rugosum</i>                                                 |
| 241                  | 1205152   | 00200012 | BRAZILIN                              | C16H14O5      | 286.29 | 474-07-7   | benzopyran    |                                                                                                                        | <i>Haematoxylum campechianum</i>                                          |
| 242                  | 1205483   | 00200010 | HAEMATOXYLIN                          | C16H14O6      | 302.29 | 517-28-2   | benzopyran    |                                                                                                                        | <i>Haematoxylum campechianum</i>                                          |
| 243                  | 21284     | 01504165 | OSTHOL                                | C15H16O3      | 244.29 | 484-12-8   | benzopyran    |                                                                                                                        | <i>Imperatoria ostruthium</i> & other Umbelliferae                        |
| 244                  | 538976409 | 01502253 | HEMATEIN                              | C16H12O6      | 300.27 | 475-25-2   | benzopyran    |                                                                                                                        | logwood,<br><i>Haematoxylum</i> spp.                                      |
| 245                  | 538977751 | 00201654 | MAACKIAIN                             | C16H12O5      | 284.27 |            | benzopyran    |                                                                                                                        | <i>Maackia</i> spp.                                                       |
| 246                  | 1205498   | 00100743 | HOMOPTEROCARPIN                       | C17H16O4      | 284.31 | 606-91-7   | benzopyran    |                                                                                                                        | mp 82-84 C;<br><i>Pterocarpus santalinus</i>                              |
| 247                  | 538977858 | 00201156 | MEDICARPIN                            | C16H14O4      | 270.29 |            | benzopyran    |                                                                                                                        | widespread in Fabaceae                                                    |
| 248                  | 538988014 | 01505160 | HINOKITIOL                            | C10H12O2      | 164.21 | 499-44-5   | benztropolone | antifungal, insecticide, plant growth inhibitor, metalloprotease inhibitor, DNA synthesis inhibitor, apoptosis inducer | <i>Chamaecyparis obtusa</i> ,<br><i>Juniperus</i> spp., <i>Thuja</i> spp. |
| 249                  | 2857      | 00210505 | PURPUROGALLIN                         | C11H8O5       | 220.18 | 569-77-7   | benztropolone | xanthine oxidase inhibitor, antioxidant                                                                                | gall of <i>Dryophanta divisa</i>                                          |
| 250                  | 538977854 | 00200111 | THEAFLAVIN                            | C29H24O12     | 564.51 | 4670-05-7  | benztropolone | antioxidant                                                                                                            | pigment in black tea                                                      |
| 251                  | 1210788   | 01500836 | CEPHALOSPORIN C SODIUM                | C16H20N3NaO8S | 437.41 | 61-24-5    | betalactam    | antibacterial                                                                                                          | <i>Cephalosporium acremonium</i>                                          |
| 252                  | 538986464 | 01500352 | INOSITOL                              | C6H12O6       | 180.16 | 87-89-8    | carbohydrate  | growth factor                                                                                                          | lipotropic polyol                                                         |

|     |           |          |                                      |            |        |            |              |                                               |                                                                                                                               |
|-----|-----------|----------|--------------------------------------|------------|--------|------------|--------------|-----------------------------------------------|-------------------------------------------------------------------------------------------------------------------------------|
|     |           |          |                                      |            |        |            |              |                                               | widely distributed in plants and animals                                                                                      |
| 253 | 538977606 | 00310002 | ADONITOL                             | C5H12O5    | 152.15 | 488-81-3   | carbohydrate |                                               | <i>Adonis</i> spp.                                                                                                            |
| 254 | 538977513 | 00300539 | ARBUTIN                              | C12H16O7   | 272.26 | 497-76-7   | carbohydrate |                                               | <i>Berginia crassifolia</i> ; also in <i>Pyrus</i> and <i>Vaccinium</i> spp.                                                  |
| 255 | 8         | 01501211 | MUCIC ACID                           | C6H10O8    | 210.14 | 526-99-8   | carbohydrate |                                               | brown algae, various fruits and fungi                                                                                         |
| 256 | 538977623 | 00310018 | QUINIC ACID                          | C7H12O6    | 192.17 | 77-95-2    | carbohydrate |                                               | <i>Cinchona</i> spp.                                                                                                          |
| 257 | 538976419 | 01502256 | SHIKIMIC ACID                        | C7H10O5    | 174.15 | 138-59-0   | carbohydrate |                                               | common constituent in plants                                                                                                  |
| 258 | 538977500 | 01502261 | QUEBRACHITOL                         | C7H14O6    | 194.19 | 642-38-6   | carbohydrate |                                               | common in dicotyledons                                                                                                        |
| 259 | 538977953 | 01503989 | GLUCITOL-4-GUCOPYANOSIDE             | C12H24O11  | 344.32 |            | carbohydrate |                                               | derivative cotton                                                                                                             |
| 260 | 1207054   | 00240437 | PERSITOL HEPTAACETATE                | C21H30O14  | 506.46 | 19147-10-5 | carbohydrate |                                               | derivative of perseitol                                                                                                       |
| 261 | 538976375 | 01502231 | CELLOBIOSE (D[+])                    | C12H22O11  | 342.30 | 528-50-7   | carbohydrate |                                               | enzymatic hydrolysis of cellulose                                                                                             |
| 262 | 538977567 | 00300531 | MELEZITOSE                           | C18H32O16  | 504.45 |            | carbohydrate |                                               | honey & plant exudates                                                                                                        |
| 263 | 538986173 | 00211539 | ARABITOL(D)                          | C5H12O5    | 152.15 | 488-82-4   | carbohydrate |                                               | <i>Lecanora sordida</i> & other lichen & fungi                                                                                |
| 264 | 538986019 | 01504124 | LINAMARIN                            | C10H17NO6  | 247.25 | 554-35-8   | carbohydrate |                                               | <i>Linum usitatissimum</i> , <i>Manihot utilissimus</i>                                                                       |
| 265 | 538985658 | 03100024 | INOSINE                              | C10H12N4O5 | 268.23 | 58-63-9    | carbohydrate | cell function activator, cardiogenic          | meat extracts, sugar beet, <i>Bacillus subtilis</i> , <i>E. coli</i> , <i>Saccharomyces cerevisiae</i> , <i>Fusarium</i> spp. |
| 266 | 538977510 | 00202130 | PERSEITOL                            | C7H16O7    | 212.20 | 527-06-0   | carbohydrate |                                               | <i>Persia</i> spp.                                                                                                            |
| 267 | 538976396 | 01502244 | AMYGDALIN                            | C20H27NO11 | 457.44 | 29883-15-6 | carbohydrate | antiinflammatory, experimental antineoplastic | <i>Rosaceae</i> spp.                                                                                                          |
| 268 | 538976417 | 01502255 | SALICIN                              | C13H18O7   | 286.28 | 138-52-3   | carbohydrate | analgesic, antipyretic                        | <i>Salix</i> spp.                                                                                                             |
| 269 | 538978131 | 01504066 | LOGANIN                              | C17H26O10  | 390.39 | 18524-94-2 | carbohydrate |                                               | <i>Strychnos nux-vomica</i> , <i>Menyanthes trifoliata</i>                                                                    |
| 270 | 538978132 | 01504071 | LOGANIC ACID                         | C16H24O10  | 376.36 | 22255-40-9 | carbohydrate |                                               | <i>Swertia caroliniensis</i> , <i>Dipsacus asperoides</i>                                                                     |
| 271 | 538986226 | 00200258 | 2',4'-DIHYDROXYCHALCONE 4'-GLUCOSIDE | C21H22O8   | 402.40 |            | chalcone     | anthelmintic & antiulcerogenic                | aglycone <i>Flamingia chappar</i> , <i>Acacia</i>                                                                             |

|     |           |          |                                             |          |        |             |          |                                                              |                                           |
|-----|-----------|----------|---------------------------------------------|----------|--------|-------------|----------|--------------------------------------------------------------|-------------------------------------------|
|     |           |          |                                             |          |        |             |          |                                                              | neovernicosa                              |
| 272 | 538988007 | 01505152 | 2',4'-DIHYDROXY-4-METHOXYCHALCONE           | C16H14O4 | 270.29 | 81674-91-1  | chalcone |                                                              | <i>Bauhinia manca</i>                     |
| 273 | 538986390 | 00211475 | 4'-METHOXYCHALCONE                          | C16H14O2 | 238.29 | 22966-19-4  | chalcone |                                                              | <i>Citrus limon</i>                       |
| 274 | 538988003 | 01505148 | 2',4'-DIHYDROXY-3,4-DIMETHOXYCHALCONE       | C17H16O5 | 300.31 |             | chalcone |                                                              | <i>Iryanthera polyneura</i>               |
| 275 | 538988008 | 01505153 | 2',3-DIHYDROXY-4,4',6'-TRIMETHOXYCHALCONE   | C18H18O6 | 330.34 | 38186-71-9  | chalcone |                                                              | <i>Merrillia caloxylon</i>                |
| 276 | 538986418 | 00200123 | 2',beta-DIHYDROXYCHALCONE                   | C15H12O3 | 240.26 |             | chalcone |                                                              | <i>Primula pulverulenta.</i>              |
| 277 | 21        | 00300554 | PHLORETIN                                   | C15H14O5 | 274.28 | 60-82-2     | chalcone |                                                              | <i>Prunus spp.</i>                        |
| 278 | 538986391 | 00200407 | 4'-HYDROXYCHALCONE                          | C15H12O2 | 224.26 | 2657-25-2   | chalcone |                                                              | <i>Shorea robusta aglycone</i>            |
| 279 | 538987995 | 01505140 | 2',4'-DIHYDROXY-3,4',6'-TRIMETHOXYCHALCONE  | C18H18O6 | 330.34 | 112572-59-5 | chalcone |                                                              | <i>Viscum album (glucoside)</i>           |
| 280 | 538986112 | 01504200 | ISOLIQUIRITIGENIN                           | C15H12O4 | 256.26 | 961-29-5    | chalcone | aldose reductase inhibitor, antineoplastic, antiinflammatory | widespread in Fabaceae                    |
| 281 | 2465      | 00210866 | KHELLIN                                     | C14H12O5 | 260.25 | 82-02-0     | chromone | vasodilator                                                  | <i>Amni visnaga Lam., Umbelliferae</i>    |
| 282 | 538986223 | 00200484 | DEOXSAPPANONE B 7,4'-DIMETHYL ETHER         | C18H18O5 | 314.34 |             | chromone |                                                              | <i>Caesalpinia sappan</i>                 |
| 283 | 538986210 | 00201331 | DEOXSAPPANONE B TRIMETHYL ETHER             | C19H20O5 | 328.37 |             | chromone |                                                              | <i>Caesalpinia sappan</i>                 |
| 284 | 538986209 | 00201136 | SAPPANONE A DIMETHYL ETHER                  | C18H16O5 | 312.33 |             | chromone |                                                              | <i>Caesalpinia sappan</i>                 |
| 285 | 538986352 | 00210658 | DEHYDROVARIABILIN                           | C17H14O4 | 282.30 |             | chromone |                                                              | <i>Dalbergia variabilis</i>               |
| 286 | 538978147 | 00200457 | ANHYDROBRAZILIC ACID                        | C12H10O5 | 234.21 |             | chromone |                                                              | derivative                                |
| 287 | 538986224 | 00201342 | DEOXSAPPANONE B 7,3'-DIMETHYL ETHER ACETATE | C20H20O6 | 356.38 |             | chromone |                                                              | derivative <i>Caesalpinia sappan</i>      |
| 288 | 1211882   | 00200447 | EUGENITOL                                   | C11H10O4 | 206.20 | 491-48-5    | chromone |                                                              | <i>Eugenia caryophyllata</i>              |
| 289 | 636       | 00200449 | ISOEUGENITOL                                | C11H10O4 | 206.20 | 479-06-1    | chromone |                                                              | <i>Eugenia caryophyllata</i>              |
| 290 | 1201554   | 00100528 | PEUCENIN                                    | C15H16O4 | 260.29 | 578-72-3    | chromone |                                                              | <i>Peucedanum ostruthium, Ptaeroxylon</i> |

|     |           |          |                              |           |        |            |          |                                                      |                                                                                              |
|-----|-----------|----------|------------------------------|-----------|--------|------------|----------|------------------------------------------------------|----------------------------------------------------------------------------------------------|
|     |           |          |                              |           |        |            |          |                                                      | <i>obliquum</i>                                                                              |
| 291 | 1201627   | 00100513 | PTAEROXYLIN                  | C15H14O4  | 258.28 | 14729-11-4 | chromone |                                                      | <i>Ptaeroxylon obliquum, Cedrelopsis grevei</i>                                              |
| 292 | 1201322   | 00100529 | HETEROPEUCENIN, METHYL ETHER | C16H18O4  | 274.32 | 26213-95-6 | chromone |                                                      | <i>Ptaeroxylon obliquum, Harrisonia perforate, Neochamaelea pulverulenta.</i>                |
| 293 | 538987986 | 01505131 | ESCULIN MONOHYDRATE          | C15H18O10 | 358.30 | 531-75-9   | coumarin | antiinflammatory                                     | <i>Fraxinus spp.</i>                                                                         |
| 294 | 21276     | 01504162 | MARMESIN                     | C14H14O4  | 246.27 | 13849-08-6 | coumarin |                                                      | <i>Aegle marmelos, Ammi majus</i>                                                            |
| 295 | 1210715   | 01500899 | ESCULETIN                    | C9H6O4    | 178.15 | 305-01-1   | coumarin | antifungal                                           | <i>Aesculus and Solanaceae spp.</i>                                                          |
| 296 | 538986174 | 00211538 | 3-HYDROXYCOUMARIN            | C9H6O3    | 162.15 | 939-19-5   | coumarin |                                                      | <i>Alyxia lucida</i>                                                                         |
| 297 | 21273     | 01504161 | DIHYDROSAMIDIN               | C21H24O7  | 388.42 |            | coumarin |                                                      | <i>Ammi visnaga</i>                                                                          |
| 298 | 21281     | 01504163 | MARMESIN ACETATE             | C16H16O5  | 288.30 |            | coumarin |                                                      | <i>Amyris elemifera</i>                                                                      |
| 299 | 538977929 | 01500729 | 4-METHYLESCULETIN            | C10H8O4   | 192.17 |            | coumarin |                                                      | <i>analog of esculetin</i>                                                                   |
| 300 | 2068      | 00102076 | IMPERATORIN                  | C16H14O4  | 270.29 | 482-44-0   | coumarin | anticonvulsant, antiinflammatory                     | <i>Angelica &amp; other Umbelliferaceae.</i>                                                 |
| 301 | 538986697 | 00231084 | UMBELLIFERONE                | C9H6O3    | 162.15 | 93-35-6    | coumarin | antifungal, phytoalexin                              | <i>Angelica, Artemisia, Coronilla, Ferula and Ruta spp.</i>                                  |
| 302 | 538977549 | 01500707 | CITROPTEN                    | C11H10O4  | 206.20 | 487-06-9   | coumarin | photosensitizing agent                               | Bergamot oil                                                                                 |
| 303 | 1201717   | 00100609 | XANTHYLETIN                  | C14H12O3  | 228.25 | 553-19-5   | coumarin |                                                      | <i>Brosimum rubescens, Ruta, Boenninghausenia, Flindersia, Zanthoxylum, and Luwunga spp.</i> |
| 304 | 538988030 | 01505176 | AURAPTENE                    | C19H22O3  | 298.39 | 495-02-3   | coumarin | antineoplastic, apoptosis inducer                    | <i>Citrus aurantium, Feronia elephantum, Aegle marmelos, Libanotis intermedia</i>            |
| 305 | 538987992 | 01505137 | BERGAPTOL                    | C11H6O4   | 202.17 | 486-60-2   | coumarin |                                                      | Citrus spp.                                                                                  |
| 306 | 538986460 | 01400208 | COUMARIN                     | C9H6O2    | 146.15 | 91-64-5    | coumarin | antineoplastic, antiinflammatory, antihyperglycaemic | <i>Coumarouna odorata, tonka beans, lavender oil</i>                                         |
| 307 | 538977553 | 00300540 | HYMECROMONE METHYL ETHER     | C11H10O3  | 190.20 | 2555-28-4  | coumarin |                                                      | <i>Dalbergia volubilis, Eupatorium pauciflorum</i>                                           |
| 308 | 538977890 | 00100572 | FRAXIDIN METHYL ETHER        | C12H12O5  | 236.23 |            | coumarin |                                                      | derivative                                                                                   |

|     |           |          |                        |          |        |            |                       |                                                         |                                                                                                  |
|-----|-----------|----------|------------------------|----------|--------|------------|-----------------------|---------------------------------------------------------|--------------------------------------------------------------------------------------------------|
| 309 | 538985937 | 00240673 | ROBUSTIC ACID          | C22H20O6 | 380.40 | 5307-59-5  | coumarin              |                                                         | <i>Derris robusta</i>                                                                            |
| 310 | 538977581 | 00211566 | SCANDENIN<br>DIACETATE | C30H30O8 | 518.57 |            | coumarin              |                                                         | <i>Derris scandens</i>                                                                           |
| 311 | 538978162 | 00300348 | SCANDENIN              | C26H26O6 | 434.49 | 5084-00-4  | coumarin              |                                                         | <i>Derris scandens</i>                                                                           |
| 312 | 21278     | 01504164 | FELAMIDIN              | C21H18O5 | 350.37 | 17559-85-2 | coumarin              |                                                         | <i>Ferulago meoides</i>                                                                          |
| 313 | 1201446   | 00300032 | ISOBERGAPTENE          | C12H8O4  | 216.20 | 482-48-4   | coumarin              |                                                         | Heracleum and other<br>Umbelliferae; mp<br>223–224 C                                             |
| 314 | 1201681   | 00300005 | SPHONDIN               | C12H8O4  | 216.20 | 483-66-9   | coumarin              |                                                         | Heracleum maximum<br>root; mp 191–192 C                                                          |
| 315 | 1201684   | 00300013 | PIMPINELLIN            | C13H10O5 | 246.22 | 131-12-4   | coumarin              | GABA receptor<br>antagonist,<br>phototoxin              | Heracleum maximum<br>root; mp 118–119 C                                                          |
| 316 | 1201447   | 00300012 | ISOPIMPINELLIN         | C13H10O5 | 246.22 | 482-27-9   | coumarin              |                                                         | Heracleum maximum;<br>mp 150–153 C<br>dimorphic (142-145 C)                                      |
| 317 | 538978163 | 00210874 | HERNIARIN              | C10H8O3  | 176.17 | 551-59-9   | coumarin              |                                                         | <i>Herniaria</i> spp.                                                                            |
| 318 | 21289     | 01504158 | LOMATIN                | C14H14O4 | 246.27 |            | coumarin              |                                                         | Lomatium nuttallii,<br>Nardostachys<br>jatamansi                                                 |
| 319 | 26        | 00300228 | LONCHOCARPIC<br>ACID   | C26H26O6 | 434.49 | 5490-47-1  | coumarin              |                                                         | <i>Lonchocarpus</i> and <i>Derris</i><br>spp.                                                    |
| 320 | 538977976 | 00240862 | KUHLMANNIN             | C17H14O5 | 298.30 |            | coumarin              |                                                         | <i>Manchaerium</i> spp.                                                                          |
| 321 | 3617      | 00201602 | PACHYRRHIZIN           | C19H12O6 | 336.30 | 10091-01-7 | coumarin              | insecticide                                             | <i>Pachyrrhizus erosus</i> ;<br>mp 206–207 C                                                     |
| 322 | 21277     | 01504168 | PEUCEDANIN             | C15H14O4 | 258.28 | 133-26-6   | coumarin              |                                                         | Peucedanum spp.                                                                                  |
| 323 | 538976346 | 00100101 | PRENYLETIN             | C14H14O4 | 246.27 | 15870-91-4 | coumarin              |                                                         | <i>Ptaeroxylon obliquum</i>                                                                      |
| 324 | 21274     | 01504160 | PTERYXIN               | C21H22O7 | 386.41 | 13161-75-6 | coumarin              | muscle relaxant                                         | <i>Pteryxia</i> spp., <i>Amni<br/>ursina</i>                                                     |
| 325 | 538976418 | 01502242 | SCOPOLETIN             | C10H8O4  | 192.17 | 92-61-5    | coumarin              | NO synthesis<br>(inducible) inhibitor,<br>anticoagulant | <i>Scopolia</i> spp.                                                                             |
| 326 | 21275     | 01504159 | SELINIDIN              | C19H20O5 | 328.37 | 19427-82-8 | coumarin              |                                                         | <i>Selinium vaginatum</i><br><i>sneezewood</i> or <i>umtati</i> ,<br><i>Ptaeroxylon Obliquum</i> |
| 327 | 1201561   | 00100540 | OBLIQUIN               | C14H12O4 | 244.25 |            | coumarin              |                                                         |                                                                                                  |
| 328 | 538985623 | 00300546 | BERGAPTEN              | C12H8O4  | 216.20 | 484-20-8   | coumarin              | antipsoriatic,<br>antiinflammatory                      | widespread in<br>Umbelliferae                                                                    |
| 329 | 1210717   | 01500901 | AESCULIN               | C15H16O9 | 340.29 | 531-75-9   | coumarin<br>glycoside | antiinflammatory                                        | <i>Aesculus</i><br><i>hippocastanum</i> ,<br><i>Fraxinus</i> spp.                                |
| 330 | 538986511 | 00240942 | ARTHONIOIC ACID        | C29H36O9 | 528.60 | 25556-24-5 | depside               |                                                         | <i>Arthonia impolita</i>                                                                         |
| 331 | 538986581 | 01505218 | BAEOMYCESIC ACID       | C19H18O8 | 374.35 | 644-66-6   | depside               |                                                         | <i>Baeomyces</i> spp.                                                                            |



|     |           |          |                                         |             |        |             |           |                                                                     |                                                                                                                      |
|-----|-----------|----------|-----------------------------------------|-------------|--------|-------------|-----------|---------------------------------------------------------------------|----------------------------------------------------------------------------------------------------------------------|
| 332 | 1201518   | 00200070 | LECANORIC ACID                          | C16H14O7    | 318.29 | 480-56-8    | depside   |                                                                     | Common constituent of lichens                                                                                        |
| 333 | 1201033   | 00200034 | ATRANORIN                               | C19H18O8    | 374.35 | 479-20-9    | depside   |                                                                     | Common lichen metabolite                                                                                             |
| 334 | 538977554 | 00201343 | EVERNIC ACID                            | C17H16O7    | 332.31 | 537-09-7    | depside   | plant growth regulator                                              | <i>Evernia</i> spp., <i>Parmelia</i> spp. and other lichens                                                          |
| 335 | 538985970 | 01504118 | DIFFRACTAIC ACID                        | C20H22O7    | 374.39 | 436-32-8    | depside   |                                                                     | <i>Usnea</i> spp.                                                                                                    |
| 336 | 1201336   | 00200054 | FUMARPROTOCETRARIC ACID                 | C22H16O12   | 472.37 | 489-50-9    | depsidone |                                                                     | <i>Cetraria islandica</i>                                                                                            |
| 337 | 538976305 | 00300222 | GANGLEOIDIN ACETATE                     | C20H16Cl2O8 | 455.25 |             | depsidone |                                                                     | derivative of gangleodin (00200045)                                                                                  |
| 338 | 538985955 | 00200035 | GANGALEOIDIN                            | C18H14Cl2O7 | 413.21 | 55365-63-4  | depsidone |                                                                     | <i>Lecanora gangaleoides</i>                                                                                         |
| 339 | 1210792   | 00241150 | LEOIDIN DIMETHYL ETHER                  | C20H18Cl2O7 | 441.27 |             | depsidone |                                                                     | lichen constituent                                                                                                   |
| 340 | 538976308 | 00200033 | LEOIDIN                                 | C18H14Cl2O7 | 413.21 | 105350-54-7 | depsidone |                                                                     | lichen metabolite                                                                                                    |
| 341 | 1201517   | 00300018 | LOBARIC ACID                            | C25H28O8    | 456.50 |             | depsidone |                                                                     | lichens of the genus <i>Stereocaulon</i> and others                                                                  |
| 342 | 1207092   | 00201716 | NORSTICTIC ACID                         | C18H12O9    | 372.29 | 571-67-5    | depsidone | antibacterial                                                       | <i>Lobaria pulmonaria</i> , <i>Usnea japonica</i> , <i>Lecanora radiosa</i> , <i>Parmelia</i> & <i>Ramalina</i> spp. |
| 343 | 1201682   | 00300006 | STICTIC ACID                            | C19H14O9    | 386.32 | 549-06-4    | depsidone |                                                                     | numerous lichens, e.g. <i>Parmelia</i> sp.                                                                           |
| 344 | 1205030   | 00300050 | ABIENOL                                 | C20H34O     | 290.49 | 17990-16-8  | diterpene |                                                                     | <i>Abies</i> spp.                                                                                                    |
| 345 | 538977565 | 00300532 | ANDROGRAPHOLIDE                         | C20H30O5    | 350.46 | 5508-58-7   | diterpene |                                                                     | <i>Adrographis peniculata</i>                                                                                        |
| 346 | 538977969 | 01503986 | CAFESTOL ACETATE                        | C22H30O4    | 358.48 | 81760-48-7  | diterpene |                                                                     | coffee bean oil                                                                                                      |
| 347 | 538980333 | 01503804 | COLFORSIN                               | C22H34O7    | 410.51 | 66575-29-9  | diterpene | adenylate cyclase activator, antiglaucoma, hypotensive, vasodilator | <i>Coleus forskohlii</i> ; HL-362; L-75-1362B                                                                        |
| 348 | 538976369 | 01502229 | ABIETIC ACID                            | C20H30O2    | 302.46 | 514-10-3    | diterpene |                                                                     | common diterpene acid in conifers                                                                                    |
| 349 | 370       | 00300058 | EPI(13)TORULOSOL                        | C20H34O2    | 306.49 | 3650-30-4   | diterpene |                                                                     | <i>Cryptomeria japonica</i> and <i>Larix sibirica</i>                                                                |
| 350 | 538977909 | 00300060 | 8-HYDROXY-15,16-BISNOR-11-LABDEN-13-ONE | C18H30O2    | 278.44 |             | diterpene |                                                                     | derivative                                                                                                           |
| 351 | 538986270 | 01504234 | 18-AMINOABIETA-8,11,13-TRIENE SULFATE   | C20H33NO4S  | 383.55 |             | diterpene |                                                                     | derivative of abietic acid                                                                                           |
| 352 | 538987901 | 00307033 | 3-HYDROXY-4-(SUCCI                      | C19H28O4    | 320.43 |             | diterpene |                                                                     | derivative of                                                                                                        |

| N-2-YL)-CARYOLANE<br>delta-LACTONE |           |          |                                                 |            |        |                    |           | caryophyllene                                                                                                                                        |
|------------------------------------|-----------|----------|-------------------------------------------------|------------|--------|--------------------|-----------|------------------------------------------------------------------------------------------------------------------------------------------------------|
| 353                                | 538987957 | 01505010 | EUPHORBIASTEROID                                | C32H40O8   | 552.67 | 28649-59-4         | diterpene | <i>Euphorbia lathyris</i> ,<br><i>Macaranga tanarius</i>                                                                                             |
| 354                                | 538976405 | 00300021 | GIBBERELIC ACID                                 | C19H22O6   | 346.38 | 77-06-5            | diterpene | <i>Gibberella fujikuroi</i>                                                                                                                          |
| 355                                | 538988031 | 01505177 | RUBESCENSIN A                                   | C20H28O6   | 364.44 | 28957-04-2         | diterpene | antibacterial,<br>antineoplastic, insect<br>growth inhibitor<br><i>Isodon trichocarpus</i> ,<br><i>I japonicus</i> , <i>Rabdosia</i><br>spp.         |
| 356                                | 538986586 | 01502023 | 7-OXOCALLITRISIC<br>ACID, METHYL ESTER          | C21H28O3   | 328.46 | 155473-19-1 (acid) | diterpene | <i>Juniperus chinensis</i>                                                                                                                           |
| 357                                | 538978114 | 01504024 | LAGOCHILIN                                      | C20H36O5   | 356.51 | 23554-81-6         | diterpene | <i>Lagochilus inebrians</i>                                                                                                                          |
| 358                                | 538976420 | 00300057 | LARIXOL ACETATE                                 | C22H36O3   | 348.53 |                    | diterpene | <i>Larix europaea</i>                                                                                                                                |
| 359                                | 538976421 | 00300056 | LARIXOL                                         | C20H34O2   | 306.49 |                    | diterpene | <i>Larix sibirica</i>                                                                                                                                |
| 360                                | 3648      | 00201662 | GRAYANOTOXIN I                                  | C22H36O7   | 412.53 | 4720-09-6          | diterpene | <i>Leucothoe grayana</i>                                                                                                                             |
| 361                                | 538987956 | 01505009 | GERANYLGERANIOL                                 | C20H34O    | 290.49 | 24034-73-9         | diterpene | apoptosis inducer<br>linseed oil;<br>widespread in plants                                                                                            |
| 362                                | 538977584 | 00100271 | TOTARALOLAL                                     | C20H28O2   | 300.44 |                    | diterpene | <i>Podocarpus</i> spp.                                                                                                                               |
| 363                                | 538977560 | 00100280 | 19-HYDROXYTOTARO<br>L                           | C20H30O2   | 302.46 | 2288-33-7          | diterpene | <i>Podocarpus</i> spp.                                                                                                                               |
| 364                                | 538977562 | 00100286 | PODOTOTARIN                                     | C40H58O2   | 570.91 |                    | diterpene | <i>Podocarpus</i> spp.                                                                                                                               |
| 365                                | 538977561 | 00100612 | TOTAROL-19-CARBOX<br>YLIC ACID, METHYL<br>ESTER | C21H30O3   | 330.47 |                    | diterpene | <i>Podocarpus</i> spp.                                                                                                                               |
| 366                                | 538978083 | 00100287 | TOTAROL                                         | C20H30O    | 286.46 | 511-15-9           | diterpene | <i>Podocarpus</i> spp.,<br><i>Dacrydium</i><br><i>cupressinum</i> , <i>Tetraclinis</i><br><i>articulata</i> and <i>Thujopsis</i><br><i>dolabrata</i> |
| 367                                | 905       | 00100267 | TOTAROL ACETATE                                 | C22H32O2   | 328.50 |                    | diterpene | <i>Podocarpus totara</i>                                                                                                                             |
| 368                                | 538988041 | 01505081 | SALVINORIN B                                    | C21H26O7   | 390.44 | 92545-30-7         | diterpene | principal metabolite<br>of salvinorin A<br><i>Salvia divinorum</i>                                                                                   |
| 369                                | 538988040 | 01505080 | SALVINORIN A                                    | C23H28O8   | 432.47 | 83729-01-5         | diterpene | k-opiod receptor<br>agonist,<br>psychotropic<br><i>Salvia divinorum</i>                                                                              |
| 370                                | 538986020 | 01504120 | CARNOSIC ACID                                   | C20H28O4   | 332.44 | 3650-09-7          | diterpene | <i>Salvia</i> spp., <i>Rosmarinus</i><br><i>officinalis</i>                                                                                          |
| 371                                | 853       | 00300003 | SOLIDAGENONE                                    | C20H28O3   | 316.44 | 23534-56-7         | diterpene | <i>Solidago canadensis</i><br>L.; mp 133–134 C                                                                                                       |
| 372                                | 538988047 | 01505034 | BACCATIN III                                    | C31H38O11  | 586.64 | 27548-93-2         | diterpene | <i>Taxus baccata</i>                                                                                                                                 |
| 373                                | 538980335 | 01503908 | PACLITAXEL                                      | C47H51NO14 | 853.93 | 33069-62-4         | diterpene | antineoplastic<br><i>Taxus brevifolia</i>                                                                                                            |
| 374                                | 538977975 | 01504005 | TRIPTOPHENOLIDE                                 | C20H24O3   | 312.41 | 74285-86-2         | diterpene | <i>Tripterygium wilfordii</i>                                                                                                                        |
| 375                                | 538988000 | 01505145 | ERIODYCTOL                                      | C15H12O6   | 288.26 | 552-58-9           | flavan    | expectorant<br>common flavan in                                                                                                                      |

|     |           |          |                                                 |           |        |             |                  |                                     |                                                                                                         |
|-----|-----------|----------|-------------------------------------------------|-----------|--------|-------------|------------------|-------------------------------------|---------------------------------------------------------------------------------------------------------|
|     |           |          |                                                 |           |        |             |                  |                                     | numerous plant families                                                                                 |
| 376 | 538985962 | 00240567 | 8-IODOCATECHIN<br>TETRAMETHYL<br>ETHER          | C19H21O6  | 472.28 |             | flavan           |                                     | derivative                                                                                              |
| 377 | 2056      | 00210220 | CATECHIN<br>TETRAMETHYLETHER                    | C19H22O6  | 346.38 |             | flavan           |                                     | derivative                                                                                              |
| 378 | 538977781 | 01600537 | CATECHIN<br>PENTAACETATE                        | C25H24O11 | 500.46 |             | flavan           |                                     | derivative                                                                                              |
| 379 | 538986361 | 01504256 | EPICATECHIN<br>PENTAACETATE                     | C25H24O11 | 500.46 |             | flavan           |                                     | derivative                                                                                              |
| 380 | 538977826 | 00210211 | EPIAFZELECHIN<br>TRIMETHYL ETHER                | C18H20O5  | 316.36 |             | flavan           |                                     | derivative                                                                                              |
| 381 | 2342      | 00205113 | EPIGALLOCATECHIN                                | C15H14O7  | 306.27 | 970-74-1    | flavan           |                                     | green tea                                                                                               |
| 382 | 538977685 | 01600561 | LIQUIRITIGENIN<br>DIMETHYL ETHER                | C17H16O4  | 284.31 | 95753-46-1  | flavan           |                                     | <i>Holocarpha obconica</i>                                                                              |
| 383 | 538986677 | 00202178 | EPIAFZELECHIN<br>(2R,3R)(-)                     | C15H14O5  | 274.28 | 24808-04-6  | flavan           |                                     | <i>Larix sibirica</i> , <i>Actinidia chinensis</i> , <i>Juniperus communis</i> , <i>Cassia javanica</i> |
| 384 | 538986065 | 01504154 | PINOCEMBRIN                                     | C15H12O4  | 256.26 | 36052-37-6  | flavan           | antiinflammatory                    | <i>Pinus</i> , <i>Prunus</i> , <i>Eucalyptus</i> spp.                                                   |
| 385 | 538985689 | 01504084 | DIHYDROROBINETIN                                | C15H12O7  | 304.26 |             | flavan           |                                     | <i>Robinia pseudoacacia</i>                                                                             |
| 386 | 538986630 | 01505256 | SILIBININ                                       | C25H22O10 | 482.45 | 22888-70-6  | flavan           | hepatoprotective agent, antioxidant | <i>Silybum marianum</i>                                                                                 |
| 387 | 538977823 | 00210205 | CIANIDANOL                                      | C15H14O6  | 290.28 | 154-23-4    | flavan           | hepatoprotectant                    | tea and cocoa constituent; (+) catechin                                                                 |
| 388 | 2338      | 00210206 | EPICATECHIN                                     | C15H14O6  | 290.28 | 490-46-0    | flavan           | antioxidant                         | tea and cocoa constituent                                                                               |
| 389 | 538977936 | 01500746 | NARINGENIN                                      | C15H12O5  | 272.26 | 480-41-1    | flavan           | antiulcer, gibberellin antagonist   | widely distributed in plants                                                                            |
| 390 | 80        | 01500765 | NARINGIN                                        | C27H32O14 | 580.55 | 10236-47-2  | flavan glycoside | antihaemorrhagic, antiinflammatory  | <i>Citrus</i> spp.                                                                                      |
| 391 | 538978173 | 00211155 | 2,3-METHANO-7,2'-DI<br>METHOXYFLAVANON<br>E     | C18H16O4  | 296.33 |             | flavanone        |                                     | derivative                                                                                              |
| 392 | 538988086 | 01505382 | 5-HYDROXY-2',4',7,8-TE<br>TRAMETHOXYFLAVO<br>NE | C19H18O7  | 358.35 | 123316-61-0 | flavone          |                                     | <i>Citrus</i> spp., <i>Limnophila rugosa</i>                                                            |
| 393 | 101       | 01500721 | 7,4'-DIHYDROXYFLAV<br>ONE                       | C15H10O4  | 254.24 | 2196-14-7   | flavone          | antioxidant                         | <i>Pterocarpus marsupium</i>                                                                            |

|     |           |          |                                |            |        |                      |         |                           |                                                                                                                                   |
|-----|-----------|----------|--------------------------------|------------|--------|----------------------|---------|---------------------------|-----------------------------------------------------------------------------------------------------------------------------------|
| 394 | 1035      | 01500719 | 7,2'-DIHYDROXYFLAVONE          | C15H10O4   | 254.24 | 77298-66-9           | flavone | antihaemorrhagic          | <i>Primula</i> spp.                                                                                                               |
| 395 | 538988084 | 01505380 | 3,4',5,6,7-PENTAMETHOXYFLAVONE | C20H20O7   | 372.38 | 4472-73-5            | flavone |                           | <i>Citrus</i> spp.                                                                                                                |
| 396 | 538988087 | 01505383 | HEXAMETHYLQUERCETAGETIN        | C21H22O8   | 402.40 | 1251-84-9            | flavone |                           | <i>Citrus</i> spp.                                                                                                                |
| 397 | 1033      | 01500717 | 6,4'-DIHYDROXYFLAVONE          | C15H10O4   | 254.24 | 63046-09-3           | flavone | antihaemorrhagic          | <i>Cassia</i> spp. as glycoside                                                                                                   |
| 398 | 538977617 | 00310012 | HESPERETIN                     | C16H14O6   | 302.29 | 520-33-2             | flavone |                           | aglycone of hesperidin (00310011)                                                                                                 |
| 399 | 538988002 | 01505147 | 3,5-DIHYDROXYFLAVONE           | C15H10O4   | 254.24 | 6665-69-6            | flavone |                           | <i>Anthemis tinctoria</i> (glucoside)                                                                                             |
| 400 | 538986014 | 01501012 | 3-HYDROXYFLAVONE               | C15H10O3   | 238.25 | 577-85-5             | flavone |                           | cabbage                                                                                                                           |
| 401 | 538977499 | 01502259 | MORIN                          | C15H10O7   | 302.24 | 480-16-0             | flavone | P450 and ATPase inhibitor | <i>Chlorophora tinctoria</i>                                                                                                      |
| 402 | 538977937 | 01500742 | 7,2'-DIMETHOXYFLAVONE          | C17H14O4   | 282.30 |                      | flavone |                           | <i>Citrus</i> spp.                                                                                                                |
| 403 | 538986649 | 01505268 | NOBILETIN                      | C21H22O8   | 402.40 | 478-01-3             | flavone |                           | <i>Citrus</i> spp.                                                                                                                |
| 404 | 538988096 | 01505381 | SINENSETIN                     | C20H20O7   | 372.38 | 2306-27-6            | flavone |                           | <i>Citrus</i> spp.                                                                                                                |
| 405 | 538986650 | 01505269 | TANGERITIN                     | C20H20O7   | 372.38 | 481-53-8             | flavone |                           | <i>Citrus</i> spp., <i>Fortunella japonica</i>                                                                                    |
| 406 | 538988044 | 01505030 | DEMETHYLNOBILETIN              | C20H20O8   | 388.38 | 2174-59-6            | flavone |                           | <i>Citrus</i> , <i>Sideritis</i> , <i>Heteropappus</i> and <i>Thymus</i> spp.; <i>Mentha piperita</i> , <i>Amaracus pampanini</i> |
| 407 | 538986455 | 01600075 | QUERCETIN PENTAMETHYL ETHER    | C20H20O7   | 372.38 |                      | flavone |                           | derivative                                                                                                                        |
| 408 | 538986006 | 01500741 | 6,4'-DIMETHOXYFLAVONE          | C17H14O4   | 282.30 | 54401-47-7           | flavone |                           | derivative <i>Cassia spectabilis</i>                                                                                              |
| 409 | 538977603 | 00200833 | ACACETIN DIACETATE             | C20H16O7   | 368.35 | 5892-39-7            | flavone |                           | derivative of acacetin                                                                                                            |
| 410 | 538986003 | 01500731 | EUPATORIN                      | C18H16O7   | 344.32 | 855-96-9             | flavone | emetic                    | <i>Eupatorium</i> spp. and other Compositae                                                                                       |
| 411 | 538988045 | 01505031 | GARDENIN B                     | C19H18O7   | 358.35 | 2798-20-1            | flavone |                           | <i>Gardenia lucida</i> ; <i>Brickellia</i> , <i>Citrus</i> and <i>Mentha</i> spp.                                                 |
| 412 | 538986295 | 00200433 | ISOGINKGETIN                   | C32H22O10  | 566.53 | 548-19-6             | flavone | bradykinin antagonist     | <i>Ginkgo biloba</i> leaves                                                                                                       |
| 413 | 538986052 | 00200436 | GINKGETIN, K salt              | C32H21KO10 | 604.62 | 481-46-9 (ginkgetin) | flavone |                           | <i>Ginkgo biloba</i> leaves                                                                                                       |

|     |           |          |                        |          |        |            |         |                                                          |                                                                                                    |
|-----|-----------|----------|------------------------|----------|--------|------------|---------|----------------------------------------------------------|----------------------------------------------------------------------------------------------------|
| 414 | 538985971 | 01504115 | HIERACIN               | C15H10O7 | 302.24 | 1621-84-7  | flavone |                                                          | <i>Ginkgo biloba, Hieracium pilosella and Isoetes spp.</i>                                         |
| 415 | 3052      | 00201315 | 7,8-DIHYDROXYFLAVONE   | C15H10O4 | 254.24 | 38183-03-8 | flavone | vascular protectant, antihemorrhagic                     | <i>Godmania aesculifolia</i>                                                                       |
| 416 | 538988004 | 01505149 | GERALDOL               | C16H12O6 | 300.27 | 21511-25-1 | flavone |                                                          | <i>Lotus corniculatus, Tetragonolobus siliquosus, Anthyllis vulneraria, Trifolium subterraneum</i> |
| 417 | 538987993 | 01505138 | 3,4'-DIHYDROXYFLAVONE  | C15H10O4 | 254.24 | 14919-49-4 | flavone |                                                          | <i>Millettia zechiana (Me ether)</i>                                                               |
| 418 | 3603      | 00201581 | SERICETIN              | C25H24O5 | 404.47 | 42438-75-5 | flavone |                                                          | <i>Mundulea sericea, M suberosa</i>                                                                |
| 419 | 538977609 | 00200846 | APIGENIN               | C15H10O5 | 270.24 | 520-36-5   | flavone | antispasmodic, antineoplastic, topoisomerase I inhibitor | parsley seed                                                                                       |
| 420 | 538987991 | 01505136 | 3',6-DIHYDROXYFLAVONE  | C15H10O4 | 254.24 | 71592-46-6 | flavone |                                                          | <i>Pimelea decora (di-Me ether)</i>                                                                |
| 421 | 538986013 | 01504132 | 6,3'-DIMETHOXYFLAVONE  | C17H14O4 | 282.30 | 79786-40-6 | flavone |                                                          | <i>Pimelia decora</i>                                                                              |
| 422 | 538977935 | 01500709 | CHRYSIN                | C15H10O4 | 254.24 | 480-40-0   | flavone | diuretic                                                 | <i>Pinus, Scutellaria, and Ulnus spp.</i>                                                          |
| 423 | 538986388 | 00201610 | FLAVOKAWAIN B          | C17H16O4 | 284.31 | 1775-97-9  | flavone |                                                          | <i>Piper, Alpinia &amp; Myrica spp.</i>                                                            |
| 424 | 538986011 | 01504130 | 3,7-DIHYDROXYFLAVONE   | C15H10O4 | 254.24 | 492-00-2   | flavone |                                                          | <i>Platymiscium praecox</i>                                                                        |
| 425 | 538977933 | 01500737 | 3,7-DIMETHOXYFLAVONE   | C17H14O4 | 282.30 | 20950-52-1 | flavone |                                                          | <i>Pongamia pinnata</i>                                                                            |
| 426 | 538987994 | 01505139 | 3',4'-DIHYDROXYFLAVONE | C15H10O4 | 254.24 | 4143-64-0  | flavone |                                                          | <i>Primula officinalis (glucoside)</i>                                                             |
| 427 | 538986286 | 01500735 | 3',4'-DIMETHOXYFLAVONE | C17H14O4 | 282.30 | 4143-62-8  | flavone |                                                          | <i>Primula officinalis</i>                                                                         |
| 428 | 538986288 | 01500740 | 8,2'-DIMETHOXYFLAVONE  | C17H14O4 | 282.30 |            | flavone |                                                          | <i>Primula pulverulenta</i>                                                                        |
| 429 | 538987934 | 01501197 | PRIMULETIN             | C15H10O3 | 238.25 | 491-78-1   | flavone |                                                          | <i>Primula spp.</i>                                                                                |
| 430 | 538977934 | 01500738 | 5,2'-DIMETHOXYFLAVONE  | C17H14O4 | 282.30 |            | flavone |                                                          | <i>Primula spp.</i>                                                                                |
| 431 | 538977636 | 00310031 | RHAMNETIN              | C16H12O7 | 316.27 | 90-19-7    | flavone |                                                          | <i>Rhamnus cathartica</i>                                                                          |
| 432 | 538976403 | 01502247 | FISSETIN               | C15H10O6 | 286.24 | 528-48-3   | flavone | antioxidant                                              | <i>Rhus and Acacia spp.</i>                                                                        |
| 433 | 538976387 | 00200499 | ACACETIN               | C16H12O5 | 284.27 | 480-44-4   | flavone | antiinflammatory,                                        | <i>Robinia pseudoacacia</i>                                                                        |

|     |           |          |                                               |           |        |            |                      |                                                                                                      |                                                                                                             |
|-----|-----------|----------|-----------------------------------------------|-----------|--------|------------|----------------------|------------------------------------------------------------------------------------------------------|-------------------------------------------------------------------------------------------------------------|
|     |           |          |                                               |           |        |            |                      | spasmolytic agent,<br>antioxidant                                                                    |                                                                                                             |
| 434 | 538986367 | 00240958 | 4'-METHOXYFLAVONE                             | C16H12O3  | 252.27 | 4143-74-2  | flavone              |                                                                                                      | <i>Sapindus saponaria</i> .                                                                                 |
| 435 | 538977971 | 01504002 | BAICALEIN                                     | C15H10O5  | 270.24 | 491-67-8   | flavone              | antiviral (HIV)                                                                                      | <i>Scutellaria baicalensis</i>                                                                              |
| 436 | 538977927 | 01500672 | QUERCETIN                                     | C15H10O7  | 302.24 | 117-39-5   | flavone              | capillary protectant,<br>antioxidant,<br>antineoplastic,<br>anti-HIV;<br>LD50(mouse)<br>159 mg/kg po | <i>Solanaceae, Rhamnaceae,<br/>Passifloraceae,<br/>Umbelliferae genera</i>                                  |
| 437 | 538977555 | 00300538 | QUERCETIN<br>TETRAMETHYL<br>(5,7,3',4') ETHER | C19H18O7  | 358.35 |            | flavone              |                                                                                                      | <i>Sterculia foetida</i>                                                                                    |
| 438 | 538987999 | 01505144 | 5,7-DIHYDROXYFLAVONE                          | C15H10O4  | 254.24 | 480-40-0   | flavone              |                                                                                                      | <i>Ulnus sieboldiana,<br/>Flourensia resinosa,<br/>Oroxylum indicum,<br/>Pinus and Scutellaria<br/>spp.</i> |
| 439 | 538978134 | 01504068 | DIOSMETIN                                     | C16H12O6  | 300.27 | 520-34-3   | flavone              |                                                                                                      | <i>Valeriana, Digitalis spp.</i>                                                                            |
| 440 | 538986002 | 01500724 | GENKWANIN                                     | C16H12O5  | 284.27 | 437-64-9   | flavone              |                                                                                                      | <i>widespread in plants</i>                                                                                 |
| 441 | 538977972 | 01504003 | CENTAUREIN                                    | C24H26O13 | 522.47 | 35595-03-0 | flavone<br>glycoside |                                                                                                      | <i>Centaurea jacea</i>                                                                                      |
| 442 | 538978136 | 01504075 | RHOIFOLIN                                     | C27H30O14 | 578.53 | 17306-46-6 | flavone<br>glycoside |                                                                                                      | <i>Chorisia, Citrus and<br/>Rhus spp.</i>                                                                   |
| 443 | 1201579   | 00200115 | PECTOLINARIN                                  | C29H34O15 | 622.59 | 28978-02-1 | flavone<br>glycoside |                                                                                                      | <i>Cirsium and Linaria<br/>spp., Kickxia elatine,<br/>Duranta plumieri</i>                                  |
| 444 | 538977948 | 00310011 | HESPERIDIN                                    | C28H34O15 | 610.57 | 520-26-3   | flavone<br>glycoside | capillary protectant                                                                                 | <i>Citrus spp.</i>                                                                                          |
| 445 | 538978102 | 00211950 | COSMOSIIN                                     | C21H20O10 | 432.39 | 578-74-5   | flavone<br>glycoside | antiviral (HIV)                                                                                      | <i>Cosmos bipinnatus,<br/>Zinnia elegans</i>                                                                |
| 446 | 538986631 | 01505257 | ICARIIN                                       | C33H40O15 | 676.68 | 489-32-7   | flavone<br>glycoside | hepatoprotective                                                                                     | <i>Epimedium spp.</i>                                                                                       |
| 447 | 538987982 | 01505127 | GOSSYPIN                                      | C21H20O13 | 480.39 | 652-78-8   | flavone<br>glycoside |                                                                                                      | <i>Gossypium spp.,<br/>Hibiscus spp.</i>                                                                    |
| 448 | 538978101 | 00350025 | APIIN                                         | C26H28O14 | 564.50 | 26544-34-3 | flavone<br>glycoside |                                                                                                      | parsley seed; flowers<br>of <i>Anthemis nobilis</i> .<br>80% + other glycosides                             |
| 449 | 538986571 | 00300607 | RUTOSIDE (rutin)                              | C27H30O16 | 610.53 | 153-18-4   | flavone<br>glycoside | vascular protectant                                                                                  | <i>Ruta graveolens</i> ,<br>widespread in plants                                                            |
| 450 | 538977895 | 01500752 | QUERCITRIN                                    | C21H20O11 | 448.39 | 522-12-3   | flavone              | antihemorrhagic                                                                                      | widespread in plants                                                                                        |

|     |           |          |                                    |            |        |            | glycoside  |                                                 |                                                                  |
|-----|-----------|----------|------------------------------------|------------|--------|------------|------------|-------------------------------------------------|------------------------------------------------------------------|
| 451 | 505       | 01504029 | LIGUSTILIDE                        | C12H14O2   | 190.24 | 4431-01-0  | furan      | antispasmodic,<br>smooth muscle<br>relaxant     | <i>Ligusticum and Angelica<br/>spp.</i>                          |
| 452 | 538986029 | 00200046 | GRISEOFULVIN                       | C17H17ClO6 | 352.77 | 126-07-8   | grisan     | antifungal, inhibits<br>mitosis in<br>metaphase | <i>Penicillium<br/>griseofulvum</i>                              |
| 453 | 1210773   | 00200243 | GRISEOFULVIC ACID                  | C16H15ClO6 | 338.75 | 469-54-5   | grisan     |                                                 | semisynthetic                                                    |
| 454 | 538988006 | 01505151 | HARPAGOSIDE                        | C23H28O11  | 480.47 | 19210-12-9 | iriod      |                                                 | <i>Melittis melissophyllum,<br/>Harpagophytum<br/>procumbens</i> |
| 455 | 3148      | 00201177 | DUARTIN (-)                        | C18H20O6   | 332.36 | 52305-04-1 | isoflavan  |                                                 | <i>Dalbergia variabilis</i>                                      |
| 456 | 3150      | 00201364 | DUARTIN, DIMETHYL<br>ETHER         | C20H24O6   | 360.41 |            | isoflavan  |                                                 | derivative of<br>DUARTIN (00201177)                              |
| 457 | 538977540 | 00240565 | 5,7-DIHYDROXYISOFL<br>AVONE        | C15H10O4   | 254.24 | 4044-00-2  | isoflavone |                                                 | <i>Arachis hypogaea &amp;<br/>Derris spp.</i>                    |
| 458 | 538986784 | 00200422 | KOPARIN                            | C16H12O6   | 300.27 | 65048-75-1 | isoflavone |                                                 | <i>Castanospermum<br/>australe</i>                               |
| 459 | 538986430 | 00240576 | 5,7-DIMETHOXYISOFL<br>AVONE        | C17H14O4   | 282.30 | 26964-35-2 | isoflavone |                                                 | <i>Cordyla africana,<br/>Arachis hypogaea</i>                    |
| 460 | 538986282 | 00200139 | ISOTECTORIGENIN,<br>7-METHYL ETHER | C18H16O6   | 328.32 |            | isoflavone |                                                 | <i>Dalbergia spp.</i>                                            |
| 461 | 538987886 | 01700330 | MUNDULONE<br>ACETATE               | C28H28O7   | 476.53 |            | isoflavone |                                                 | derivative                                                       |
| 462 | 538977590 | 00200873 | IRIGENIN TRIMETHYL<br>ETHER        | C21H22O8   | 402.40 |            | isoflavone |                                                 | derivative                                                       |
| 463 | 538986416 | 00240645 | RETUSIN<br>7-METHYL ETHER          | C17H14O5   | 298.30 |            | isoflavone |                                                 | derivative Dalbergia<br>spp.                                     |
| 464 | 538976321 | 10100004 | BIOCHANIN A,<br>7-METHYL ETHER     | C17H14O5   | 298.30 | 34086-51-6 | isoflavone |                                                 | derivative of<br>biochanin A                                     |
| 465 | 538976313 | 01501208 | KARANJIN                           | C17H10O4   | 278.27 | 521-88-0   | isoflavone |                                                 | <i>Derris and Tephrosia<br/>spp.</i>                             |
| 466 | 3594      | 00201650 | DERRUBONE                          | C21H18O6   | 366.37 | 22044-58-2 | isoflavone |                                                 | <i>Derris robusta</i>                                            |
| 467 | 538986653 | 01401419 | DERRUSTONE                         | C18H14O6   | 326.31 | 2204-59-3  | isoflavone |                                                 | <i>Derris robusta</i>                                            |
| 468 | 1207050   | 00210454 | ROBUSTONE                          | C21H16O6   | 364.36 |            | isoflavone |                                                 | <i>Derris robusta, Millettia<br/>thonningii</i>                  |
| 469 | 538977785 | 01401401 | METHYL ROBUSTONE                   | C22H18O6   | 378.39 |            | isoflavone |                                                 | <i>Derris spp.</i>                                               |
| 470 | 3205      | 00201310 | 2'-METHOXYFORMON<br>ETIN           | C17H14O5   | 298.30 |            | isoflavone |                                                 | <i>Eschscholtzia californica</i>                                 |
| 471 | 538976392 | 00300601 | BIOCHANIN A<br>DIACETATE           | C20H16O7   | 368.35 |            | isoflavone |                                                 | Fabaceae; biochanin<br>derivative                                |
| 472 | 538977580 | 00201182 | IRIGENOL                           | C15H10O8   | 318.24 | 4935-93-7  | isoflavone |                                                 | <i>Iris spp.</i>                                                 |

|     |           |          |                                    |           |        |            |                         |                                                                                                                 |                                                                                           |
|-----|-----------|----------|------------------------------------|-----------|--------|------------|-------------------------|-----------------------------------------------------------------------------------------------------------------|-------------------------------------------------------------------------------------------|
| 473 | 21280     | 01504166 | ISOOSAJIN                          | C25H24O5  | 404.47 | 5745-54-0  | isoflavone              |                                                                                                                 | <i>Maclura pomifera</i>                                                                   |
| 474 | 3602      | 00201580 | POMIFERIN                          | C25H24O6  | 420.47 | 572-03-2   | isoflavone              | antioxidant                                                                                                     | <i>Maclura pomifera</i>                                                                   |
| 475 | 3613      | 00201595 | OSAJIN                             | C25H24O5  | 404.47 | 482-53-1   | isoflavone              |                                                                                                                 | <i>Maclura pomifera</i>                                                                   |
| 476 | 1205721   | 00200011 | MUNDULONE                          | C26H26O6  | 434.49 | 481-94-7   | isoflavone              |                                                                                                                 | <i>Mundulea sericea</i>                                                                   |
| 477 | 538986415 | 00200416 | KOPARIN 2'-METHYL<br>ETHER         | C17H14O6  | 314.30 |            | isoflavone              |                                                                                                                 | <i>Myroxylon peruiferum</i>                                                               |
| 478 | 538986685 | 01505282 | BIOCHANIN A,<br>DIMETHYL ETHER     | C18H16O5  | 312.33 | 1162-82-9  | isoflavone              |                                                                                                                 | <i>Ouratea hexasperma</i>                                                                 |
| 479 | 3465      | 00201341 | ISOTECTORIGENIN<br>TRIMETHYL ETHER | C19H18O6  | 342.35 |            | isoflavone              |                                                                                                                 | parent <i>Dalbergia</i> spp.,<br><i>Millettia auriculata</i>                              |
| 480 | 1919      | 00102018 | ICHTHYNONE                         | C23H20O7  | 408.41 | 24340-62-3 | isoflavone              | piscicide                                                                                                       | <i>Piscidia erythrina</i> and<br><i>Millettia rubiginosa</i>                              |
| 481 | 538977601 | 00200789 | DAIDZEIN                           | C15H10O4  | 254.24 | 486-66-8   | isoflavone              | phytoestrogen                                                                                                   | red clover                                                                                |
| 482 | 538977502 | 00102007 | FORMONONETIN                       | C16H12O4  | 268.27 | 485-72-3   | isoflavone              | phytoestrogen                                                                                                   | soyabean and clover<br>species                                                            |
| 483 | 538976320 | 10100003 | BIOCHANIN A                        | C16H12O5  | 284.27 | 491-80-5   | isoflavone              | phytoestrogen                                                                                                   | widely distributed in<br>Leguminosae                                                      |
| 484 | 2381      | 00210296 | GENISTEIN                          | C15H10O5  | 270.24 | 446-72-0   | isoflavone              |                                                                                                                 | widely distributed in<br>Leguminosae                                                      |
| 485 | 538977659 | 00201328 | TECTORIGENIN                       | C16H12O6  | 300.27 |            | isoflavone              |                                                                                                                 | widespread in<br>Fabaceae                                                                 |
| 486 | 538977589 | 00200793 | IRIDIN                             | C24H26O13 | 522.47 | 491-74-7   | isoflavone<br>glycoside |                                                                                                                 | <i>Iris</i> spp.                                                                          |
| 487 | 538986411 | 01504411 | PICROPODOPHYLLOT<br>OXIN ACETATE   | C24H24O9  | 456.45 |            | lignan                  |                                                                                                                 | derivative                                                                                |
| 488 | 538986412 | 01504412 | PODOPHYLLOTXIN<br>ACETATE          | C24H24O9  | 456.45 | 1180-34-3  | lignan                  |                                                                                                                 | derivative                                                                                |
| 489 | 538986437 | 01504739 | beta-PELTATIN                      | C22H22O8  | 414.42 | 518-29-6   | lignan                  | antineoplastic,<br>cytotoxic                                                                                    | <i>Podophyllum</i> spp.                                                                   |
| 490 | 538977381 | 02300332 | PODOFILOX                          | C22H22O8  | 414.42 | 518-28-5   | lignan                  | antineoplastic,<br>inhibits microtubule<br>assembly, and<br>human DNA<br>topoisomerase II;<br>antimitotic agent | <i>Podophyllum peltatum</i> ;<br><i>podophyllotoxin</i>                                   |
| 491 | 538986410 | 01504410 | PICROPODOPHYLLOT<br>OXIN           | C22H22O8  | 414.42 | 477-47-4   | lignan                  | antineoplastic;<br>10% cytotoxicity of<br>podophyllotoxin                                                       | <i>Podophyllum</i><br><i>peltatum</i> ; epimer of<br>podophyllotoxin;<br>10% mitotoxicity |
| 492 | 5         | 00100005 | ANTHOTHECOL                        | C28H32O7  | 480.56 | 10410-83-0 | limonoid                |                                                                                                                 | also as<br>11-ACETOXYCEDREL<br>ONE                                                        |



|     |           |          |                                                 |           |        |            |          |                                                                             |
|-----|-----------|----------|-------------------------------------------------|-----------|--------|------------|----------|-----------------------------------------------------------------------------|
| 493 | 538978141 | 00100102 | CARAPIN-8(9)-ENE                                | C27H30O7  | 466.54 |            | limonoid | Carapa and Cedrela species                                                  |
| 494 | 1201054   | 00100008 | CARAPIN                                         | C27H32O7  | 468.55 | 3463-88-5  | limonoid | Carapa and Cedrela species; mp 180–185                                      |
| 495 | 2         | 00100003 | ANDIROBIN                                       | C27H32O7  | 468.55 | 6488-63-7  | limonoid | <i>Carapa guayanensis</i>                                                   |
| 496 | 538976329 | 00100031 | FISSINOLIDE                                     | C29H36O8  | 512.61 | 1915-69-1  | limonoid | <i>Cedrela fissilis</i> , <i>Khaya grandifoliola</i>                        |
| 497 | 1201055   | 00100009 | CEDRELONE                                       | C26H30O5  | 422.53 | 1254-85-9  | limonoid | Cedrela species                                                             |
| 498 | 538986760 | 01505341 | NOMILIN                                         | C28H34O9  | 514.58 | 1063-77-0  | limonoid | antineoplastic<br><i>Citrus</i> spp.                                        |
| 499 | 1204174   | 01800018 | LIMONIN                                         | C26H30O8  | 470.52 | 1180-71-8  | limonoid | <i>Citrus</i> , <i>Eoodia</i> ,<br><i>Dictamnus</i> and <i>Luwunga</i> spp. |
| 500 | 538978077 | 00100199 | DEOXYGEDUNOL ACETATE                            | C30H38O7  | 510.63 |            | limonoid | derivative                                                                  |
| 501 | 538978142 | 00100105 | 8beta-HYDROXYCARAPIN, 3,8-HEMIACETAL            | C27H32O8  | 484.55 |            | limonoid | derivative                                                                  |
| 502 | 1201236   | 00100655 | DIHYDROGEDUNIC ACID, METHYL ESTER               | C26H36O8  | 476.57 |            | limonoid | derivative                                                                  |
| 503 | 1201231   | 00100375 | alpha-DIHYDROGEDUNOL                            | C28H38O7  | 486.61 |            | limonoid | derivative                                                                  |
| 504 | 1201549   | 00100359 | 3,16-DIDEOXYMEXICANOLIDE-3beta-DIOL             | C27H36O7  | 472.58 |            | limonoid | derivative                                                                  |
| 505 | 1201545   | 00100222 | 3-DEOXO-3beta-HYDROXYMEXICANOLIDE 16-ENOL ETHER | C28H36O7  | 484.59 |            | limonoid | derivative                                                                  |
| 506 | 538976330 | 00100465 | DIHYDROFISSINOLIDE                              | C29H38O8  | 514.62 |            | limonoid | derivative of fissionolide (00100031)                                       |
| 507 | 1210776   | 00100146 | 7-DESACETOXY-6,7-DEHYDROGEDUNIN                 | C26H30O5  | 422.53 |            | limonoid | derivative of gedunin                                                       |
| 508 | 538976339 | 00100054 | ANGOLENSIC ACID, METHYL ESTER                   | C27H34O7  | 470.57 | 2629-14-3  | limonoid | <i>Entandrophragma angolense</i>                                            |
| 509 | 6         | 00100006 | BUSSEIN                                         | C43H54O18 | 858.90 | 41060-14-4 | limonoid | <i>Entandrophragma</i> species                                              |
| 510 | 1201695   | 00100081 | UTILIN                                          | C41H52O17 | 816.86 | 31218-22-1 | limonoid | <i>Entandrophragma utile</i>                                                |
| 511 | 538985967 | 00100517 | ENTANDROPHRAGMIN                                | C43H56O17 | 844.92 | 11013-05-1 | limonoid | <i>Entandrophragma</i> spp.                                                 |
| 512 | 1201459   | 00100103 | KHAYASIN C                                      | C30H38O8  | 526.63 |            | limonoid | ester analog of Khayasin (00100050)                                         |
| 513 | 1201375   | 00100195 | ISOGEDUNIN                                      | C28H34O7  | 482.58 |            | limonoid | <i>Guarea Thompsonii</i> ; mp 215–218                                       |
| 514 | 1201462   | 00100162 | KHIVORIN                                        | C32H42O10 | 586.69 | 2524-38-1  | limonoid | Khaya and other West                                                        |

|     |           |          |                                                |           |        |            |          |                          |                                                                              |
|-----|-----------|----------|------------------------------------------------|-----------|--------|------------|----------|--------------------------|------------------------------------------------------------------------------|
|     |           |          |                                                |           |        |            |          |                          | African timbers                                                              |
| 515 | 3         | 00100016 | DEOXYANDIROBIN                                 | C27H32O6  | 452.55 |            | limonoid |                          | <i>Khaya grandifoliola</i>                                                   |
| 516 | 1201453   | 00100002 | 11alpha-ACETOXYKHIVORIN                        | C34H44O12 | 644.72 |            | limonoid |                          | <i>Khaya madagascariensis</i>                                                |
| 517 | 1201455   | 00100048 | 7-DEACETOXY-7-OXO KHIVORIN                     | C30H38O9  | 542.63 | 15004-51-0 | limonoid |                          | <i>Khaya senegalensis</i> and other Meliaceae; mp 225                        |
| 518 | 1201457   | 00100050 | KHAYASIN                                       | C32H42O8  | 554.69 |            | limonoid |                          | <i>Khaya</i> species                                                         |
| 519 | 1201456   | 00100049 | KHAYANTHONE                                    | C32H42O9  | 570.69 | 25279-68-9 | limonoid |                          | <i>Khaya</i> species                                                         |
| 520 | 1205624   | 00100014 | 7-DEACETYLKHIVORIN                             | C30H40O9  | 544.65 |            | limonoid |                          | <i>Khaya</i> species and other West African timbers                          |
| 521 | 538977839 | 00100576 | TRIDESACETOXYKHIVORIN                          | C26H36O7  | 460.57 |            | limonoid |                          | <i>Khaya</i> spp.                                                            |
| 522 | 1201293   | 00100012 | DEACETYLGEDUNIN                                | C26H32O6  | 440.54 |            | limonoid |                          | <i>Khaya</i> , <i>Azadirachta</i> and other West African timbers; mp 264–266 |
| 523 | 538985526 | 01503802 | AZADIRACHTIN                                   | C35H44O16 | 720.73 | 11141-17-6 | limonoid | antifeedant, insecticide | <i>Melia azadirach</i> and <i>Azadirachta indica</i>                         |
| 524 | 1201073   | 00100615 | CHUKRASIN METHYL ETHER                         | C43H58O16 | 830.93 |            | limonoid |                          | Meliaceae                                                                    |
| 525 | 538986667 | 00212126 | 1,3-DIDEACETYLDEOXYKHIVORIN                    | C28H38O7  | 486.61 |            | limonoid |                          | <i>Meliaceae</i> spp.                                                        |
| 526 | 538986086 | 00100901 | 3beta-HYDROXYDEOXYDESACETOXY-7-OXO GEDUNIN     | C26H32O6  | 440.54 |            | limonoid |                          | <i>Meliaceae</i> spp.                                                        |
| 527 | 538978179 | 00100290 | 2,3-DIHYDROISOGEDUNIN                          | C28H36O7  | 484.59 |            | limonoid |                          | <i>Meliaceae</i> spp.                                                        |
| 528 | 1201394   | 00100434 | DIHYDRODEOXYGEDUNIN                            | C28H36O6  | 468.60 |            | limonoid |                          | <i>Meliaceae</i> spp.                                                        |
| 529 | 1205418   | 00100439 | 1(2)alpha-EPOXYDEOXYDIHYDROGEDUNIN             | C28H34O7  | 482.58 |            | limonoid |                          | <i>Meliaceae</i> spp.                                                        |
| 530 | 538978062 | 00100056 | 6-ACETOXYANGOLENIC ACID METHYL ESTER           | C29H36O9  | 528.60 |            | limonoid |                          | <i>Meliaceae</i> spp.                                                        |
| 531 | 1201146   | 00100368 | 1,2alpha-EPOXY-7-DEACETOXY-7-OXODIHYDROGEDUNIN | C26H30O7  | 454.52 |            | limonoid |                          | <i>Meliaceae</i> spp.                                                        |
| 532 | 538986088 | 00102034 | 3beta,7beta-DIACETOXYDEOXYDEOXYDIHYDROGEDUNIN  | C30H40O7  | 512.65 |            | limonoid |                          | <i>Meliaceae</i> spp.                                                        |

| UNIN |           |          |                                                          |           |        |           |                                   |
|------|-----------|----------|----------------------------------------------------------|-----------|--------|-----------|-----------------------------------|
| 533  | 538978205 | 00100423 | DEACETOXY-7-OXISO<br>GEDUNIN                             | C26H30O6  | 438.53 |           | limonoid<br><i>Meliaceae</i> spp. |
| 534  | 1201711   | 00100424 | XYLOCARPUS A                                             | C31H38O11 | 586.64 |           | limonoid<br><i>Meliaceae</i> spp. |
| 535  | 1210759   | 00100013 | 3-DEACETYLKHIVORI<br>N                                   | C30H40O9  | 544.65 |           | limonoid<br><i>Meliaceae</i> spp. |
| 536  | 538985916 | 00100190 | 3-alpha-HYDROXYDEO<br>XYGEDININ                          | C28H36O6  | 468.60 |           | limonoid<br><i>Meliaceae</i> spp. |
| 537  | 1201480   | 00100585 | 1,7-DIDEACETOXY-1,7-<br>DIOXOKHIVORIN                    | C28H34O8  | 498.58 |           | limonoid<br><i>Meliaceae</i> spp. |
| 538  | 538986296 | 00300558 | GEDUNOL                                                  | C28H36O7  | 484.59 |           | limonoid<br><i>Meliaceae</i> spp. |
| 539  | 1201134   | 00100201 | 3-DEOXO-3beta-ACETO<br>XYDEOXYDIHYDROGE<br>DUNIN         | C30H40O7  | 512.65 |           | limonoid<br><i>Meliaceae</i> spp. |
| 540  | 538986044 | 00100651 | 3beta-ACETOXYDEOXY<br>ANGOLENSIC ACID,<br>METHYL ESTER   | C29H38O8  | 514.62 |           | limonoid<br><i>Meliaceae</i> spp. |
| 541  | 538986087 | 00102035 | 3beta-HYDROXYDEOX<br>ODIHYDRODEOXYGE<br>DUNIN            | C28H38O6  | 470.61 |           | limonoid<br><i>Meliaceae</i> spp. |
| 542  | 1201465   | 00100060 | MEXICANOLIDE                                             | C27H32O7  | 468.55 | 1915-67-9 | limonoid<br><i>Meliaceae</i> spp. |
| 543  | 1201321   | 00100432 | DEOXYGEDUNIN                                             | C28H34O6  | 466.58 |           | limonoid<br><i>Meliaceae</i> spp. |
| 544  | 538985928 | 00100205 | 3alpha-ACETOXYDIHY<br>DRODEOXYGEDUNIN                    | C30H40O7  | 512.65 |           | limonoid<br><i>Meliaceae</i> spp. |
| 545  | 538977632 | 00100047 | DEACETOXY-7-OXOGE<br>DUNIN                               | C26H30O6  | 438.53 |           | limonoid<br><i>Meliaceae</i> spp. |
| 546  | 538978125 | 00100173 | EPOXYGEDUNIN                                             | C28H34O8  | 498.58 |           | limonoid<br><i>Meliaceae</i> spp. |
| 547  | 538985929 | 00100358 | 1,7-DIDEACETOXY-1,7-<br>DIOXO-3-DEACETYLK<br>HIVORIN     | C26H32O7  | 456.54 |           | limonoid<br><i>Meliaceae</i> spp. |
| 548  | 538985940 | 00100139 | DEOXYKHIVORIN                                            | C32H42O9  | 570.69 |           | limonoid<br><i>Meliaceae</i> spp. |
| 549  | 538978068 | 00100129 | 8-HYDROXYCARAPINI<br>C ACID                              | C26H30O8  | 470.52 |           | limonoid<br><i>Meliaceae</i> spp. |
| 550  | 538978063 | 00100058 | 6-HYDROXYANGOLE<br>NSIC ACID METHYL<br>ESTER             | C27H34O8  | 486.57 |           | limonoid<br><i>Meliaceae</i> spp. |
| 551  | 1201227   | 00100492 | beta-DIHYDROGEDUN<br>OL                                  | C28H38O7  | 486.61 |           | limonoid<br><i>Meliaceae</i> spp. |
| 552  | 538978067 | 00100114 | 3alpha-HYDROXY-3-DE<br>OXYANGOLESIC<br>ACID METHYL ESTER | C27H36O7  | 472.58 |           | limonoid<br><i>Meliaceae</i> spp. |
| 553  | 538978065 | 00100096 | 3-DEOXY-3beta-HYDR                                       | C27H36O7  | 472.58 |           | limonoid<br><i>Meliaceae</i> spp. |

| OXYANGOLENSIC ACID METHYL ESTER |           |          |                                          |           |        |            |          |                                                       |                                                                          |
|---------------------------------|-----------|----------|------------------------------------------|-----------|--------|------------|----------|-------------------------------------------------------|--------------------------------------------------------------------------|
| 554                             | 1201228   | 00100497 | 3beta-ACETOXYDEOXODIHYDROGEDUNIN         | C30H40O8  | 528.65 |            | limonoid |                                                       | <i>Meliaceae</i> spp.                                                    |
| 555                             | 1201136   | 00100223 | 1,2alpha-EPOXYDEACE TOXYDIHYDROGEDUNIN   | C26H32O7  | 456.54 |            | limonoid |                                                       | <i>Meliaceae</i> spp.                                                    |
| 556                             | 1201467   | 00100355 | 1,3-DIDEACETYL-7-DEACETOXY-7-OXOKHIVORIN | C26H34O7  | 458.56 |            | limonoid |                                                       | <i>Meliaceae</i> spp.                                                    |
| 557                             | 538976347 | 00100024 | DIHYDROGEDUNIN                           | C28H36O7  | 484.59 |            | limonoid |                                                       | <i>Meliaceae</i> spp.                                                    |
| 558                             | 1201296   | 00100032 | GEDUNIN                                  | C28H34O7  | 482.58 | 2753-30-2  | limonoid | antifeedant; heat shock inducer                       | numerous <i>Meliaceae</i> species                                        |
| 559                             | 538977915 | 00240930 | AVOCADANE ACETATE                        | C19H38O4  | 330.51 |            | lipid    |                                                       | avocado seeds                                                            |
| 560                             | 538977914 | 00240560 | AVOCADENE ACETATE                        | C19H36O4  | 328.50 | 24607-09-8 | lipid    | antifungal, plant growth inhibitor                    | avocado seeds                                                            |
| 561                             | 538977847 | 10101011 | BIXIN                                    | C25H30O4  | 394.52 | 39937-23-0 | lipid    |                                                       | <i>Bixa orellana</i> seeds                                               |
| 562                             | 538986658 | 01505276 | CAPSANTHIN                               | C40H56O3  | 584.89 | 465-42-9   | lipid    | antineoplastic                                        | <i>Capsicum annuum</i>                                                   |
| 563                             | 1119      | 01501128 | CAPSAICIN                                | C18H27NO3 | 305.42 | 404-86-4   | lipid    | analgesic (topical), depletes Substance P, neurotoxic | <i>Capsicum</i> spp.                                                     |
| 564                             | 538977780 | 01503674 | ANTHERAXANTHIN                           | C40H56O3  | 584.89 | 640-03-9   | lipid    |                                                       | <i>Euonymus europaeus</i>                                                |
| 565                             | 1210908   | 01501203 | RETINOL                                  | C20H30O   | 286.46 | 68-26-8    | lipid    | vitamin A                                             | fish & liver oils, eggs, milk                                            |
| 566                             | 538977957 | 01503983 | BATYL ALCOHOL                            | C21H44O3  | 344.58 | 544-62-7   | lipid    |                                                       | fish oils                                                                |
| 567                             | 538987929 | 01505247 | GINKGOLIC ACID                           | C22H34O3  | 346.51 | 22910-60-7 | lipid    | antibacterial, antitubercular                         | <i>Ginkgo biloba</i>                                                     |
| 568                             | 538977621 | 00310016 | CHAULMOGRIC ACID                         | C18H32O2  | 280.45 | 502-30-7   | lipid    | antibacterial (mycobacteria)                          | <i>Hydnocarpus</i> and <i>Oncola</i> spp.                                |
| 569                             | 538976350 | 00200428 | ROCCELIC ACID                            | C17H32O4  | 300.44 | 22139-54-4 | lipid    |                                                       | <i>Lecanora</i> and <i>Roccella</i> spp.                                 |
| 570                             | 538987905 | 00240928 | DIMETHYL CAPERATATE                      | C23H42O7  | 430.59 |            | lipid    |                                                       | lichens: <i>Parmelia</i> , <i>Mycoblastus</i> , <i>Nephromopsis</i> spp. |
| 571                             | 538987904 | 00240927 | CAPERATIC ACID                           | C21H38O7  | 402.53 | 29227-64-3 | lipid    | antibacterial (tuberculostatic)                       | lichens: <i>Parmelia</i> , <i>Mycoblastus</i> , <i>Nephromopsis</i> spp. |
| 572                             | 538977626 | 00310021 | PHYTOL                                   | C19H38O   | 282.51 |            | lipid    |                                                       | nettles                                                                  |
| 573                             | 538987892 | 01505325 | SOLANESOL                                | C45H74O   | 631.09 | 13190-97-1 | lipid    |                                                       | <i>Nicotiana tabacum</i> ; Betulaprenol 9: mp 42 C                       |

|     |           |          |                                               |               |        |            |            |                                                     |                                                                                                    |
|-----|-----------|----------|-----------------------------------------------|---------------|--------|------------|------------|-----------------------------------------------------|----------------------------------------------------------------------------------------------------|
| 574 | 538987893 | 01505326 | SOLANESYL ACETATE                             | C47H76O2      | 673.13 |            | lipid      |                                                     | <i>Nicotiana tabacum</i> ;<br><i>Murraya exotica</i> ; <i>Pinus</i><br>spp.                        |
| 575 | 538987889 | 01505807 | AVOCADENOFURAN                                | C17H28O       | 248.41 | 25346-24-1 | lipid      |                                                     | <i>Persea</i> spp.                                                                                 |
| 576 | 538986646 | 01505234 | AVOCADYNE                                     | C17H32O3      | 284.44 | 34524-38-4 | lipid      | antibacterial,<br>antifungal                        | <i>Persea</i> spp.                                                                                 |
| 577 | 538987888 | 01505806 | AVOCADANOFURAN                                | C17H30O       | 250.43 |            | lipid      |                                                     | <i>Persea</i> spp.                                                                                 |
| 578 | 538978239 | 00240929 | AVOCADYNE<br>ACETATE                          | C19H34O4      | 326.48 | 24607-06-5 | lipid      | antifungal                                          | <i>Persea</i> spp.                                                                                 |
| 579 | 538987890 | 01505808 | AVOCADYNOFURAN                                | C17H26O       | 246.40 | 24708-33-6 | lipid      |                                                     | <i>Persea</i> spp. and <i>Elodia</i><br><i>canadensis</i>                                          |
| 580 | 538987877 | 00240932 | AVOCADENE                                     | C17H34O3      | 286.46 | 24607-08-7 | lipid      | antifungal                                          | <i>Persia americana</i> ;<br>avocado seeds                                                         |
| 581 | 538977644 | 00310039 | alpha-TOCHOPHEROL                             | C29H50O2      | 430.72 | 59-02-9    | lipid      | vitamin E                                           | soya, wheat germ and<br>other plant oils                                                           |
| 582 | 1204093   | 01800172 | BYSSOCHLAMIC ACID                             | C18H20O6      | 332.36 | 743-51-1   | macrolide  |                                                     | <i>Byssochlamys</i> spp.                                                                           |
| 583 | 1201115   | 00300037 | CRASSIN ACETATE                               | C22H32O5      | 376.50 | 28068-69-1 | macrolide  | antiviral                                           | numerous gorgonids;<br>mp 123–125 C                                                                |
| 584 | 538986417 | 00700024 | HAEMATOPORPHYRI<br>N<br>DIHYDROCHLORIDE       | C34H40Cl2N4O6 | 671.63 | 17696-69-4 | porphyrin  | antidepressant,<br>antineoplastic                   | <i>Chlorella vulgaris</i> ;<br>derived blood                                                       |
| 585 | 1210772   | 01501111 | PROTOPORPHYRIN IX                             | C34H34N4O4    | 562.67 | 553-12-8   | porphyrin  | hepatoprotectant                                    | mamalian feces, avian<br>pigment                                                                   |
| 586 | 13        | 01500857 | BILIRUBIN                                     | C33H36N4O6    | 584.68 | 635-65-4   | porphyrin  |                                                     | pigment mamalian<br>gallstones, blood and<br>urine                                                 |
| 587 | 538985487 | 01503904 | PATULIN                                       | C7H6O4        | 154.12 | 149-29-1   | pyran      | antibacterial                                       | <i>Aspergillus clavatus</i> ,<br><i>Penicillium patulum</i>                                        |
| 588 | 1204168   | 01800166 | KOJIC ACID                                    | C6H6O4        | 142.11 | 501-30-4   | pyran      | chelator,<br>antibacterial, skin<br>whitening agent | <i>Aspergillus</i> spp.                                                                            |
| 589 | 538977630 | 00310025 | LARIXINIC ACID                                | C6H6O3        | 126.11 | 118-71-8   | pyran      |                                                     | <i>Larix decidua</i>                                                                               |
| 590 | 538986119 | 01600759 | 4-HYDROXY-6-METHY<br>LPYRAN-2-ONE             | C6H6O3        | 126.11 | 675-10-5   | pyran      |                                                     | <i>Penicillium stiptatum</i>                                                                       |
| 591 | 538985690 | 01504090 | 2-PROPYL-3-HYDROXY<br>ETHYLENEPYRAN-4-O<br>NE | C10H12O3      | 180.21 |            | pyran      |                                                     | <i>Withania somnifera</i>                                                                          |
| 592 | 1201472   | 00100455 | MEROGEDUNIN                                   | C21H28O4      | 344.45 |            | quassinoid |                                                     | derivative                                                                                         |
| 593 | 538977634 | 00310028 | QUASSIN                                       | C22H28O6      | 388.46 | 76-78-8    | quassinoid | insecticide,<br>antiamoebic                         | <i>Quassia amara</i> , <i>Picrasma</i><br><i>excelsa</i> and <i>Ailanthus</i><br><i>glandulosa</i> |
| 594 | 538985665 | 01500223 | DAUNORUBICIN                                  | C27H29NO10    | 527.53 | 20830-81-3 | quinone    | antineoplastic                                      | <i>Streptomyces peucetius</i> ;                                                                    |

|     |           |          |                                           |          |        |            |         |                                                                                             |                                                                                                                                                                                                          |
|-----|-----------|----------|-------------------------------------------|----------|--------|------------|---------|---------------------------------------------------------------------------------------------|----------------------------------------------------------------------------------------------------------------------------------------------------------------------------------------------------------|
|     |           |          |                                           |          |        |            |         |                                                                                             | FI-6339,<br>NDC-0082-4155,<br>RP-13057                                                                                                                                                                   |
| 595 | 538977505 | 00300556 | CHRYSAROBIN                               | C15H12O3 | 240.26 | 491-58-7   | quinone |                                                                                             | <i>Andira araroba</i> (glacial AcOH)                                                                                                                                                                     |
| 596 | 538987984 | 01505129 | PLUMBAGIN                                 | C11H8O3  | 188.18 | 481-42-5   | quinone | antibacterial,<br>antifungal,<br>tuberculostatic;<br>antifeedant<br>(African army<br>worms) | <i>Aristea</i> , <i>Diospyros</i> &<br><i>Plumbago</i> spp.;<br><i>Dyerophyton</i> , <i>Drosera</i> ,<br><i>Dioncophyllum</i> ,<br><i>Nepenthe</i> , <i>Sisyrinchium</i><br>and <i>Sparaxis tricolor</i> |
| 597 | 538985669 | 01502254 | MENADIONE                                 | C11H8O2  | 172.19 | 58-27-5    | quinone | prothrombogenic<br>agent                                                                    | <i>Asplenium</i> and <i>Juglans</i><br>spp.                                                                                                                                                              |
| 598 | 538977654 | 00310299 | THYMOQUINONE                              | C10H12O2 | 164.21 |            | quinone |                                                                                             | <i>Callitris</i> , <i>Monarda</i> spp.,<br><i>Juniperus cedrus</i> , <i>Nigella</i><br><i>sativa</i>                                                                                                     |
| 599 | 1210714   | 01500898 | EMODIN                                    | C15H10O5 | 270.24 | 518-82-1   | quinone | antibacterial,<br>antineoplastic,<br>cathartic, tyrosine<br>kinase inhibitor                | Cascara, Rheum and<br>Rhamnus species                                                                                                                                                                    |
| 600 | 860       | 00201664 | CELASTROL                                 | C29H38O4 | 450.62 | 34157-83-0 | quinone | antineoplastic,<br>antiinflammatory, NO<br>synthesis inhibitor,<br>chaperone stimulant      | <i>Celastrus scandens</i> &<br><i>Tripterygium wilfordii</i>                                                                                                                                             |
| 601 | 2990      | 00201448 | 4,4'-DIMETHOXYDALB<br>ERGIONE             | C17H16O4 | 284.31 |            | quinone |                                                                                             | <i>Dalbergia nigra</i>                                                                                                                                                                                   |
| 602 | 1201661   | 00200255 | RETUSOQUINONE                             | C11H12O  | 160.22 |            | quinone |                                                                                             | <i>Dalbergia retusa</i>                                                                                                                                                                                  |
| 603 | 2991      | 00201092 | 4-METHOXYDALBERG<br>IONE                  | C16H14O3 | 254.29 | 4646-86-0  | quinone |                                                                                             | <i>Dalbergia retusa</i> and <i>D.</i><br><i>nigra</i>                                                                                                                                                    |
| 604 | 538977596 | 00201281 | DALBERGIONE                               | C15H12O2 | 224.26 |            | quinone |                                                                                             | <i>Dalbergia</i> spp.                                                                                                                                                                                    |
| 605 | 2992      | 00200798 | DALBERGIONE,<br>4-METHOXY-4'-HYDR<br>OXY- | C16H14O4 | 270.29 |            | quinone |                                                                                             | <i>Dalbergia</i> spp.                                                                                                                                                                                    |
| 606 | 538977721 | 00240828 | 3,4-DIMETHOXYDALB<br>ERGIONE              | C17H16O4 | 284.31 | 41043-20-3 | quinone | induces dermatitis                                                                          | <i>Dalbergia</i> spp.,<br><i>Machaerium</i> spp.                                                                                                                                                         |
| 607 | 538978135 | 01504074 | EMBELIN                                   | C17H26O4 | 294.39 |            | quinone | anthelmintic, oral<br>contraceptive                                                         | <i>Embelia</i> spp.                                                                                                                                                                                      |
| 608 | 538976309 | 01501204 | LAPACHOL                                  | C15H14O3 | 242.28 | 84-79-7    | quinone | antineoplastic,<br>antifungal                                                               | heartwood of<br><i>Bignoniaceae</i>                                                                                                                                                                      |
| 609 | 538976410 | 01502250 | LAWSONE                                   | C10H6O3  | 174.16 | 83-72-7    | quinone |                                                                                             | <i>Lawsonia</i> spp.                                                                                                                                                                                     |
| 610 | 1201448   | 00300038 | JUGLONE                                   | C10H6O3  | 174.16 | 481-39-0   | quinone | antineoplastic,<br>antifungal                                                               | leaves and nuts of<br><i>Juglans</i> spp., <i>Carya</i> spp.                                                                                                                                             |

|     |           |          |                                                      |          |        |            |                 |                                                                                 |                                                    |
|-----|-----------|----------|------------------------------------------------------|----------|--------|------------|-----------------|---------------------------------------------------------------------------------|----------------------------------------------------|
|     |           |          |                                                      |          |        |            |                 |                                                                                 | <i>and Pterocarya spp.</i>                         |
| 611 | 538986422 | 00200413 | 2,6-DIMETHOXYQUINONE                                 | C8H8O4   | 168.15 | 35069-70-6 | quinone         | antibacterial, induces dermatitis, mutagen                                      | <i>Picrasmus &amp; Ailanthus spp.</i>              |
| 612 | 135       | 00211468 | DANTRON                                              | C14H8O4  | 240.22 | 117-10-2   | quinone         | cathartic                                                                       | <i>Rheum palmatum, Xyris semifuscata</i>           |
| 613 | 538987921 | 01505812 | CRYPTOTANSHINONE                                     | C19H20O3 | 296.37 | 35825-57-1 | quinone         | inhibits angiogenesis                                                           | <i>Salvia miltiorrhiza, Rosmarinus officinalis</i> |
| 614 | 538987918 | 01505825 | DIHYDROTANSHINONE I                                  | C18H14O3 | 278.31 |            | quinone         |                                                                                 | <i>Salvia miltiorrhiza</i>                         |
| 615 | 538987917 | 01505824 | TANSHINONE IIA                                       | C19H18O3 | 294.35 | 568-72-9   | quinone         | antineoplastic, bone resorption inhibitor, antiproliferative, apoptosis inducer | <i>Salvia miltiorrhiza</i>                         |
| 616 | 538977583 | 00200463 | BRAZILEIN                                            | C16H12O5 | 284.27 | 600-76-0   | quinone methide |                                                                                 | <i>Caesalpinia spp.</i>                            |
| 617 | 1201578   | 00200090 | OBTUSAQUINONE                                        | C16H14O3 | 254.29 | 21105-15-7 | quinone methide |                                                                                 | <i>Dalbergia retusa</i>                            |
| 618 | 538977922 | 00210186 | CITRININ                                             | C13H14O5 | 250.25 | 518-75-2   | quinone methide | antibacterial                                                                   | <i>Penicillium citrinum</i>                        |
| 619 | 538977764 | 00202175 | 12a-HYDROXY-5-DEOXYDEHYDROMUNDUSERONE                | C19H18O6 | 342.35 |            | rotenoid        |                                                                                 | derivative                                         |
| 620 | 538977759 | 00200004 | 12a-HYDROXY-9-DEME THYLMUNDUSERONE-8-CARBOXYLIC ACID | C19H16O9 | 388.33 |            | rotenoid        |                                                                                 | derivative                                         |
| 621 | 1201674   | 00200851 | ROTENONIC ACID                                       | C23H24O6 | 396.44 | 70191-71-8 | rotenoid        |                                                                                 | derivative of rotenone (00200013)                  |
| 622 | 3443      | 00201449 | DIHYDROROTENONE                                      | C23H24O6 | 396.44 |            | rotenoid        |                                                                                 | derivative; mp 209–211 C                           |
| 623 | 3781      | 00203010 | beta-TOXICAROL                                       | C23H22O7 | 410.43 | 82-11-1    | rotenoid        |                                                                                 | Derris species & isomeration of alpha-toxicarol    |
| 624 | 2746      | 00211224 | alpha-TOXICAROL                                      | C23H22O7 | 410.43 | 82-09-7    | rotenoid        |                                                                                 | <i>Derris spp.</i>                                 |
| 625 | 428       | 00200013 | ROTENONE                                             | C23H22O6 | 394.43 | 83-79-4    | rotenoid        | acaricide, ectoparasiticide, antineoplastic, mitochondrial poison               | <i>Derris spp.</i>                                 |
| 626 | 3442      | 00201153 | beta-DIHYDROROTENONE                                 | C23H24O6 | 396.44 |            | rotenoid        |                                                                                 | <i>Derris spp.</i> ; rotenone derivative           |
| 627 | 3441      | 00201154 | DEHYDROROTENONE                                      | C23H20O6 | 392.41 | 30990-44-4 | rotenoid        |                                                                                 | <i>Derris spp.</i> ; rotenone                      |

|     |           |          |                                    |          |        |            |               |                                                                 | derivative                                                             |
|-----|-----------|----------|------------------------------------|----------|--------|------------|---------------|-----------------------------------------------------------------|------------------------------------------------------------------------|
| 628 | 3567      | 00201477 | MUNDOSERONE                        | C19H18O6 | 342.35 | 3564-85-0  | rotenoid      |                                                                 | Mundulea suberosa;<br>mp 156–161 C                                     |
| 629 | 538977682 | 00201657 | PACHYRRHIZONE                      | C20H14O7 | 366.33 | 42485-00-7 | rotenoid      | insecticide                                                     | <i>Pachyrrhizus erosus</i>                                             |
| 630 | 1201420   | 00200015 | ISOROTENONE                        | C23H22O6 | 394.43 |            | rotenoid      |                                                                 | semisynthetic                                                          |
| 631 | 2993      | 00201138 | DEGUELIN(-)                        | C23H22O6 | 394.43 | 522-17-8   | rotenoid      | antineoplastic,<br>antiviral, insecticide                       | <i>Tephrosia &amp; Derris</i> spp.                                     |
| 632 | 538976382 | 00307057 | BISABOLOL                          | C15H26O  | 222.37 | 515-69-5   | sesquiterpene | antiinflammatory,<br>antiulcer, antiseptic,<br>antitubercular   | <i>Abies, Pinaceae</i> and<br>related species                          |
| 633 | 67        | 01501107 | PICROTOXININ                       | C15H16O6 | 292.29 | 17617-45-7 | sesquiterpene | convulsant, GABA<br>receptor antagonist,<br>ichthyotoxin        | <i>Anamirta cocculus,</i><br><i>Menispermum cocculus</i>               |
| 634 | 538986059 | 01504149 | LEUCODIN                           | C15H18O3 | 246.31 | 17946-87-1 | sesquiterpene | antiinflammatory,<br>hypolipidemic                              | <i>Artemisia &amp; Achillea</i><br>spp.                                |
| 635 | 538977448 | 01503042 | ARTEMISININ                        | C15H22O5 | 282.34 | 63968-64-9 | sesquiterpene | antimalarial                                                    | <i>Artemisia annua</i>                                                 |
| 636 | 538977506 | 00300542 | SANTONIN                           | C15H18O3 | 246.31 | 481-06-1   | sesquiterpene |                                                                 | <i>Artemisia</i> spp.                                                  |
| 637 | 1205340   | 00300055 | CADIN-4-EN-10-OL                   | C15H26O  | 222.37 |            | sesquiterpene |                                                                 | <i>Chamaecyparis</i> spp. and<br><i>Juniperus</i> spp.                 |
| 638 | 1210719   | 01503640 | PARTHENOLIDE                       | C15H20O3 | 248.32 | 20554-84-1 | sesquiterpene | 5HT antagonist,<br>antineoplastic,<br>smooth muscle<br>relaxant | <i>Chrysanthemum</i><br><i>parthenium, Michelia</i><br><i>champaca</i> |
| 639 | 1210699   | 01500842 | CARYOPHYLLENE<br>[t(-)]            | C14H22   | 190.33 | 87-44-5    | sesquiterpene |                                                                 | clove, cinnamon and<br>many other oils                                 |
| 640 | 1210690   | 01500832 | CARYLOPHYLLENE<br>OXIDE            | C14H22O  | 206.33 | 1139-30-6  | sesquiterpene |                                                                 | clove, cinnamon and<br>many other oils                                 |
| 641 | 538976381 | 00307059 | CEDROL                             | C15H26O  | 222.37 | 77-53-2    | sesquiterpene | acaricide                                                       | Common constituent<br>in the Family<br>Cupressaceae                    |
| 642 | 538976411 | 01502251 | NEROLIDOL                          | C15H26O  | 222.37 | 7212-44-4  | sesquiterpene |                                                                 | common in essential<br>oils of flowers                                 |
| 643 | 538986049 | 01504139 | AUSTRICINE                         | C15H18O4 | 262.31 | 10180-88-8 | sesquiterpene | antihyperlipidemic,<br>antiinflammatory                         | Compositae                                                             |
| 644 | 1205968   | 00300048 | KOBUSONE                           | C14H22O2 | 222.33 | 24173-71-5 | sesquiterpene |                                                                 | <i>Cyperus rotundus,</i><br><i>Sindora sumatrana</i>                   |
| 645 | 1204849   | 00300117 | ISOKOBUSONE                        | C14H22O2 | 222.33 | 24173-72-6 | sesquiterpene |                                                                 | <i>Cyperus rotundus,</i><br><i>Sindora sumatrana</i>                   |
| 646 | 1201275   | 00300049 | 5-HYDROXYIMINOISO<br>CARYOPHYLLENE | C15H23NO | 233.36 |            | sesquiterpene |                                                                 | derivative                                                             |
| 647 | 538976383 | 00307058 | BISABOLOL ACETATE                  | C17H28O2 | 264.41 |            | sesquiterpene |                                                                 | derivative                                                             |
| 648 | 1204972   | 00300119 | 2-HYDROXY-5                        | C15H26O2 | 238.37 |            | sesquiterpene |                                                                 | derivative                                                             |



|     |           |          |                                                                                                             |          |        |            |               |                                                   |                                                                                                                   |
|-----|-----------|----------|-------------------------------------------------------------------------------------------------------------|----------|--------|------------|---------------|---------------------------------------------------|-------------------------------------------------------------------------------------------------------------------|
|     |           |          | (6)EPOXY-TETRAHYD<br>ROCARYOPHYLLENE                                                                        |          |        |            |               |                                                   |                                                                                                                   |
| 649 | 1204566   | 00300104 | 2-METHYLENE-5-(2,5-D<br>IOXOTETRAHYDROFU<br>RAN-3-YL)-6-OXO--10,1<br>0-DIMETHYLBICYCLO[<br>7: 2: 0]UNDECANE | C18H24O4 | 304.39 |            | sesquiterpene |                                                   | derivative                                                                                                        |
| 650 | 1204973   | 00300111 | 2-METHOXY-5<br>(6)EPOXY-TETRAHYD<br>ROCARYOPHYLLENE                                                         | C16H28O2 | 252.40 |            | sesquiterpene |                                                   | derivative                                                                                                        |
| 651 | 538977913 | 00300166 | 15-NORCARYOPHYLL<br>EN-3-ONE                                                                                | C14H22O  | 206.33 |            | sesquiterpene |                                                   | derivative                                                                                                        |
| 652 | 1201869   | 00300133 | CLOVANEDIOL<br>DIACETATE                                                                                    | C19H30O4 | 322.45 |            | sesquiterpene |                                                   | <i>derivative Dipterocarpus<br/>pilosus, Salvia<br/>canariensis, Viguiera<br/>oaxacana, Sindora<br/>sumatrana</i> |
| 653 | 1201868   | 00300132 | 3,7-EPOXYCARYOPHY<br>LLAN-6-ONE                                                                             | C15H24O2 | 236.36 |            | sesquiterpene |                                                   | derivative <i>Lippia</i> spp.                                                                                     |
| 654 | 1204974   | 00300118 | 3,7-EPOXYCARYOPHY<br>LLAN-6-OL                                                                              | C15H26O2 | 238.37 |            | sesquiterpene |                                                   | derivative <i>Lippia</i> spp.                                                                                     |
| 655 | 538976386 | 00307056 | MUUROLLADIE-3-ON<br>E                                                                                       | C15H22O  | 218.34 |            | sesquiterpene |                                                   | derivative of<br>muurolene                                                                                        |
| 656 | 1205010   | 00300110 | 3-NOR-3-OXOPANASI<br>NSAN-6-OL                                                                              | C14H22O2 | 222.33 |            | sesquiterpene |                                                   | derivative Panax<br>ginseng                                                                                       |
| 657 | 1201758   | 00300052 | SENECRASSIDIOL<br>6-ACETATE                                                                                 | C17H28O3 | 280.41 |            | sesquiterpene |                                                   | derivative Senecio<br>crassissimus                                                                                |
| 658 | 538977678 | 00300148 | CARYOPHYLLENYL<br>ACETATE                                                                                   | C17H26O2 | 262.40 |            | sesquiterpene |                                                   | <i>Dipterocarpus</i> spp.                                                                                         |
| 659 | 538987937 | 01505186 | CULMORIN                                                                                                    | C15H26O2 | 238.37 | 18374-83-9 | sesquiterpene |                                                   | <i>Fusarium</i> spp.                                                                                              |
| 660 | 7         | 01501210 | HUMULENE (alpha)                                                                                            | C15H24   | 204.36 | 6753-98-6  | sesquiterpene |                                                   | hops and clove oils                                                                                               |
| 661 | 1204619   | 00300101 | EPOXY<br>(1,11)HUMULENE                                                                                     | C15H24O  | 220.36 |            | sesquiterpene |                                                   | <i>Humulus lupulus</i>                                                                                            |
| 662 | 538976364 | 00240914 | PSEUDO-ANISATIN                                                                                             | C15H22O6 | 298.34 | 31090-37-6 | sesquiterpene | GABA antagonist                                   | <i>Illicium anisatum</i>                                                                                          |
| 663 | 538980369 | 00310010 | HELENINE                                                                                                    | C15H20O2 | 232.33 | 546-43-0   | sesquiterpene | anthelmintic,<br>antibacterial,<br>antineoplastic | <i>Inula</i> spp.                                                                                                 |
| 664 | 19        | 01501022 | FARNESOL                                                                                                    | C15H26O  | 222.37 | 4602-84-0  | sesquiterpene |                                                   | major component in<br>oil of <i>Hibiscus<br/>abelmoschus</i>                                                      |
| 665 | 538980373 | 00100346 | PICROTIN                                                                                                    | C15H18O7 | 310.31 | 21416-53-5 | sesquiterpene | GABAa receptor<br>antagonist                      | nontoxin component<br>of PICROTOXIN                                                                               |

|     |           |          |                                   |          |        |            |               |                                                                                                                                   |                                                                                                                         |
|-----|-----------|----------|-----------------------------------|----------|--------|------------|---------------|-----------------------------------------------------------------------------------------------------------------------------------|-------------------------------------------------------------------------------------------------------------------------|
| 666 | 1204710   | 00300105 | beta-CARYOPHYLLEN<br>E ALCOHOL    | C15H26O  | 222.37 |            | sesquiterpene |                                                                                                                                   | <i>palmarosa oil,</i><br><i>Cymbopogon martini</i>                                                                      |
| 667 | 1204135   | 01800170 | FREQUENTIN                        | C14H20O4 | 252.31 | 29119-03-7 | sesquiterpene | antifungal                                                                                                                        | <i>Penicillium frequentans</i>                                                                                          |
| 668 | 818       | 00400011 | PUNCTAPORONIN B                   | C15H24O3 | 252.36 | 93697-36-0 | sesquiterpene |                                                                                                                                   | <i>Poronia punctata</i>                                                                                                 |
| 669 | 538977620 | 00310015 | CEDRYL ACETATE                    | C17H28O2 | 264.41 | 77-54-3    | sesquiterpene |                                                                                                                                   | semisynthetic                                                                                                           |
| 670 | 538986054 | 01504143 | ARTENIMOL                         | C15H24O5 | 284.36 | 81496-81-3 | sesquiterpene | antimalarial,<br>antiinflammatory                                                                                                 | semisynthetic;<br>dihydroartemisinin                                                                                    |
| 671 | 538985480 | 01502249 | GUAIAZULENE                       | C15H18   | 198.31 | 489-84-9   | sesquiterpene | antioxidant, inhibits<br>lipid peroxidation<br>inhibitor,<br>antiinflammatory,<br>hepatoprotectant;<br>LD50(rat) 1550<br>mg/kg po | synthetic                                                                                                               |
| 672 | 538976371 | 01502234 | ABSCISIC ACID<br>(cis,trans; +/-) | C15H20O4 | 264.32 |            | sesquiterpene | abscission-accelera<br>t                                                                                                          | synthetic                                                                                                               |
| 673 | 538978190 | 01500835 | URSOCHOLANIC<br>ACID              | C24H40O2 | 360.59 | 546-18-9   | sterol        |                                                                                                                                   | <i>Abrus pectorius</i>                                                                                                  |
| 674 | 1210720   | 01500904 | CHOLIC ACID,<br>METHYL ESTER      | C25H42O5 | 422.61 | 1448-36-8  | sterol        |                                                                                                                                   | acid as primary bile<br>constituent                                                                                     |
| 675 | 538986082 | 01701028 | CORTISONE                         | C21H28O5 | 360.45 | 53-06-5    | sterol        | antiinflammatory,<br>glucocorticoid                                                                                               | adrenal cortical<br>hormone                                                                                             |
| 676 | 538978242 | 00100315 | TIGOGENIN                         | C27H44O3 | 416.65 | 77-60-1    | sterol        |                                                                                                                                   | <i>Agavaceae,</i><br><i>Dioscoreaceae,</i><br><i>Solanaceae,</i><br><i>Scrophulariaceae,</i><br><i>Liliaceae genera</i> |
| 677 | 277       | 00100308 | ROCKOGENIN                        | C27H44O4 | 432.65 | 16653-52-4 | sterol        |                                                                                                                                   | <i>Agave americana, A.</i><br><i>gracilipes</i>                                                                         |
| 678 | 538977939 | 01500760 | HECOGENIN                         | C27H42O4 | 430.63 | 467-55-0   | sterol        | antiinflammatory                                                                                                                  | <i>Agave and Yucca spp.</i><br>aglycon of digitoxin,<br>thevetin, cerberin,<br>echujin, evomonoside;<br>mp 217–218      |
| 679 | 264       | 00100688 | DIGOXIGENIN                       | C23H34O5 | 390.52 | 1672-46-4  | sterol        |                                                                                                                                   | aglycon of GITOXIN                                                                                                      |
| 680 | 449       | 00100584 | GITOXIGENIN<br>DIACETATE          | C27H38O7 | 474.60 | 5996-03-2  | sterol        |                                                                                                                                   | aglycon of GITOXIN                                                                                                      |
| 681 | 538977986 | 01500849 | CHOLEST-5-EN-3-ONE                | C27H44O  | 384.65 | 601-54-7   | sterol        |                                                                                                                                   | animal fats;<br>mp 79–80 C                                                                                              |
| 682 | 538986448 | 00307031 | CHOLESTERYL<br>ACETATE            | C29H48O2 | 428.70 | 604-35-3   | sterol        |                                                                                                                                   | animal tissue;<br>derivative                                                                                            |
| 683 | 1210700   | 01500843 | LATHOSTEROL                       | C27H46O  | 386.67 |            | sterol        |                                                                                                                                   | <i>Austeria rubens</i>                                                                                                  |
| 684 | 496       | 01500605 | URSODIOL                          | C24H40O4 | 392.58 | 128-13-2   | sterol        | anticholelithogenic;                                                                                                              | bear bile                                                                                                               |

|     |           |          |                                  |          |        |            |        | LD50(rat)<br>890 mg/kg ip                                                                    |                                                                                                                               |
|-----|-----------|----------|----------------------------------|----------|--------|------------|--------|----------------------------------------------------------------------------------------------|-------------------------------------------------------------------------------------------------------------------------------|
| 685 | 1210718   | 00100566 | DEOXYCHOLIC ACID                 | C24H40O4 | 392.58 | 88-44-3    | sterol |                                                                                              | bile constituent                                                                                                              |
| 686 | 538978184 | 01504053 | FUCOSTANOL                       | C29H52O  | 416.74 | 83-45-4    | sterol |                                                                                              | <i>Calendula officinalis</i>                                                                                                  |
| 687 | 1201536   | 00100093 | ODORATONE                        | C30H48O4 | 472.71 |            | sterol |                                                                                              | <i>Cedrela</i> species                                                                                                        |
| 688 | 538978103 | 00100318 | DIOSGENIN                        | C27H42O3 | 414.63 | 512-04-9   | sterol | antiinflammatory,<br>estrogen; LD50(rat)<br>4872 mg/kg ip.<br>LD50 (mouse)<br>>8000 mg/kg po | <i>Clintonia, Dioscorea and<br/>Solanum</i> spp., <i>Trillium<br/>erectum, Balanites<br/>aegyptiaca, Aletris<br/>farinosa</i> |
| 689 | 538986293 | 01500854 | 7-OXOCHOLESTEROL                 | C27H44O2 | 400.65 | 566-28-9   | sterol |                                                                                              | <i>Cliona copiosa</i>                                                                                                         |
| 690 | 538986441 | 00307035 | 7-OXOCHOLESTERYL<br>ACETATE      | C29H46O3 | 442.69 |            | sterol |                                                                                              | <i>Cliona copiosa</i>                                                                                                         |
| 691 | 1210704   | 01500847 | CHOLESTEROL                      | C27H46O  | 386.67 | 57-88-5    | sterol |                                                                                              | common animal sterol                                                                                                          |
| 692 | 1144      | 00201696 | LANOSTEROL<br>ACETATE            | C32H52O2 | 468.77 |            | sterol |                                                                                              | derivative of<br>lanosterol                                                                                                   |
| 693 | 1058      | 00200744 | ERGOSTEROL<br>ACETATE            | C32H50O2 | 466.75 | 2418-45-3  | sterol |                                                                                              | derivative;<br>mp 179–181 C                                                                                                   |
| 694 | 538978046 | 00100687 | GITOXIGENIN                      | C23H34O5 | 390.52 | 545-26-6   | sterol | antineoplastic                                                                               | <i>Digitalis</i> spp.                                                                                                         |
| 695 | 493       | 00100583 | EUPHOL ACETATE                   | C32H52O2 | 468.77 |            | sterol |                                                                                              | <i>Euphorbia</i> spp.                                                                                                         |
| 696 | 1210695   | 01500838 | CHOLECALCIFEROL                  | C27H44O  | 384.65 | 67-97-0    | sterol | vitamin D3                                                                                   | fish oils                                                                                                                     |
| 697 | 538986341 | 01800109 | ERGOSTA-7,22-DIEN-3-<br>ONE      | C28H44O  | 396.66 | 32507-77-0 | sterol |                                                                                              | <i>Fomes &amp; Coriolis</i> spp.                                                                                              |
| 698 | 1200688   | 01500311 | FUSIDIC ACID                     | C31H48O6 | 516.72 | 6990-06-3  | sterol | antibacterial                                                                                | <i>Fusidium</i> spp.                                                                                                          |
| 699 | 538978086 | 00100310 | HECOGENIN<br>ACETATE             | C29H44O5 | 472.67 | 915-35-5   | sterol |                                                                                              | <i>Hechtia texensis, Agave<br/>&amp; Yucca</i> spp.                                                                           |
| 700 | 538986424 | 00107108 | 5alpha-ANDROSTAN-3,<br>17-DIONE  | C19H28O2 | 288.43 |            | sterol | androgen                                                                                     | human urine &<br>adrenal cortex                                                                                               |
| 701 | 538977614 | 00310009 | EPIANDROSTERONE                  | C19H30O2 | 290.45 |            | sterol |                                                                                              | in normal human<br>urine                                                                                                      |
| 702 | 538977691 | 00100296 | NEOTIGOGENIN<br>ACETATE          | C29H46O4 | 458.69 |            | sterol |                                                                                              | <i>Lycopersicon<br/>pimpinellifolium &amp;<br/>Agave</i> spp.                                                                 |
| 703 | 1210697   | 01500840 | CHOLIC ACID                      | C24H40O5 | 408.58 | 81-25-4    | sterol |                                                                                              | mammalian bile                                                                                                                |
| 704 | 1210721   | 01500906 | LITHOCHOLIC ACID                 | C24H40O3 | 376.58 | 434-13-9   | sterol | LD50(mouse)<br>3900 mg/kg po                                                                 | mammalian bile and<br>gallstones,<br>faecal matter                                                                            |
| 705 | 538978170 | 01504056 | EPICOPROSTEROL                   | C27H48O  | 388.68 | 516-92-7   | sterol |                                                                                              | mammalian excretions                                                                                                          |
| 706 | 538986292 | 01500852 | CHOLESTANONE                     | C27H46O  | 386.67 | 566-88-1   | sterol |                                                                                              | mammalian tissue                                                                                                              |
| 707 | 538986438 | 01701001 | ANDROSTA-1,4-DIEN-3<br>,17-DIONE | C19H24O2 | 284.40 | 897-06-3   | sterol |                                                                                              | mammary neoplasms;<br>cholesterol metabolite                                                                                  |
| 708 | 538986440 | 00270083 | 5alpha-CHOLESTAN-3b              | C27H46O2 | 402.67 |            | sterol |                                                                                              | <i>Mandevilla pentlandiana</i>                                                                                                |

| eta-OL-6-ONE |           |          |                                    |           |         |                                        |                  |                                                                  |                                                                                  |
|--------------|-----------|----------|------------------------------------|-----------|---------|----------------------------------------|------------------|------------------------------------------------------------------|----------------------------------------------------------------------------------|
| 709          | 538986451 | 01701047 | TETRAHYDROCORTISONE                | C21H32O5  | 364.49  | 53-05-4                                | sterol           |                                                                  | microbial degradation of cortisone                                               |
| 710          | 538986447 | 00270088 | CHOLESTAN-3-ONE                    | C27H46O   | 386.67  | 566-88-1                               | sterol           |                                                                  | minor mammalian sterol                                                           |
| 711          | 833       | 00100682 | SARMENTOGENIN                      | C23H34O5  | 390.52  |                                        | sterol           |                                                                  | mp 270; aglucone of sarmentocymarin<br><i>Strophanthus sarmentosus</i>           |
| 712          | 538986442 | 00270049 | alpha-HYDROXYDEOXYCHOLIC ACID      | C24H40O4  | 392.58  | 83-49-8                                | sterol           |                                                                  | pig bile                                                                         |
| 713          | 538986439 | 00270090 | CHOLESTAN-3beta,5alpha,6beta-TRIOL | C27H48O3  | 420.68  | 1253-84-5                              | sterol           |                                                                  | <i>Pteroides esperi</i>                                                          |
| 714          | 538986443 | 00270051 | METHYL DEOXYCHOLATE                | C25H42O4  | 406.61  | 3245-38-3                              | sterol           |                                                                  | rabbit bile & feces                                                              |
| 715          | 538986242 | 01504228 | CRUSTECDYSONE                      | C27H44O7  | 480.65  | 5289-74-7                              | sterol           | insect molting hormone                                           | silkworm moth <i>Bombyx mori</i> & the plant <i>Achyranthes fauriei</i>          |
| 716          | 538978085 | 00100298 | SMILAGENIN ACETATE                 | C29H46O4  | 458.69  |                                        | sterol           |                                                                  | <i>Smilax ornata</i> , <i>Agave</i> & <i>Yucca</i> spp.                          |
| 717          | 538977737 | 00107013 | SMILAGENIN                         | C27H44O3  | 416.65  | 126-18-1                               | sterol           |                                                                  | <i>Smilax</i> spp.                                                               |
| 718          | 538978249 | 01504051 | STIGMASTEROL                       | C29H48O   | 412.71  |                                        | sterol           |                                                                  | soya and calabar beans; widely distributed in plant oils                         |
| 719          | 858       | 00100291 | STROPHANTHIDIN                     | C23H32O6  | 404.51  | 66-28-4                                | sterol           | cardiotonic                                                      | <i>Strophanthus kombe</i>                                                        |
| 720          | 1201535   | 00100090 | NILOTICIN                          | C30H48O3  | 456.72  |                                        | sterol           |                                                                  | <i>Turraea nilotica</i>                                                          |
| 721          | 538986452 | 01701060 | HYDROXYPROGESTERONE                | C21H30O3  | 330.47  | 3168-01-2                              | sterol           | progestagen                                                      | urine and blood                                                                  |
| 722          | 538985930 | 00107022 | beta-SITOSTEROL                    | C29H50O   | 414.72  | 83-46-5                                | sterol           |                                                                  | widespread in plants                                                             |
| 723          | 538977744 | 00107023 | SITOSTERYL ACETATE                 | C31H52O2  | 456.76  |                                        | sterol           |                                                                  | widespread in plants                                                             |
| 724          | 538976401 | 00200743 | ERGOSTEROL                         | C28H44O   | 396.66  | 57-87-4                                | sterol           |                                                                  | yeast                                                                            |
| 725          | 353       | 01500676 | OUABAIN                            | C29H44O12 | 584.67  | 11018-89-6,<br>630-60-4<br>[anhydrous] | sterol glycoside | antiarrhythmic, cardiotonic, hypertensive, Na/K ATPase inhibitor | <i>Acokanthera</i> and <i>Strophanthus</i> spp.                                  |
| 726          | 265       | 01500247 | DIGOXIN                            | C41H64O14 | 780.96  | 20830-75-5                             | sterol glycoside | cardiac stimulant                                                | <i>Digitalis lanata</i> or <i>D. orientalis</i> Lam.,<br><i>Scrophulariaceae</i> |
| 727          | 259       | 00100325 | DIGITONIN                          | C56H92O29 | 1229.34 | 11024-24-1                             | sterol glycoside |                                                                  | <i>Digitalis purpurea</i>                                                        |
| 728          | 538977587 | 01500246 | DIGITOXIN                          | C41H64O13 | 764.96  | 71-63-6                                | sterol glycoside | inotropic,                                                       | <i>Digitalis</i> spp.                                                            |

|     |           |          |                                |           |         |                   |                  |                                              |                                                                                                           |
|-----|-----------|----------|--------------------------------|-----------|---------|-------------------|------------------|----------------------------------------------|-----------------------------------------------------------------------------------------------------------|
|     |           |          |                                |           |         |                   |                  | cardiotonic                                  |                                                                                                           |
| 729 | 1210737   | 01500986 | GITOXIN                        | C41H64O14 | 780.96  | 4562-36-1         | sterol glycoside | cardiotonic                                  | <i>Digitalis</i> spp.                                                                                     |
| 730 | 538978107 | 01504018 | HEADACOSIDE C                  | C59H96O26 | 1221.41 |                   | sterol glycoside |                                              | <i>Hedera helix</i>                                                                                       |
| 731 | 839       | 00100568 | SARMENTOSIDE B                 | C34H48O13 | 664.75  |                   | sterol glycoside |                                              | <i>Strophanthus sarmentosus</i> ;<br>mp 193–195                                                           |
| 732 | 538978124 | 01504044 | RESVERATROL<br>4'-METHYL ETHER | C15H14O3  | 242.28  | 33626-08-3        | stilbene         |                                              | derivative                                                                                                |
| 733 | 538978118 | 01504041 | TRIACETYLRRESVERATROL          | C20H18O6  | 354.36  | 42206-94-0        | stilbene         |                                              | <i>Kirkpatrickia variolosa</i><br>(sponge)                                                                |
| 734 | 538986208 | 00201067 | PINOSYLVIN METHYL<br>ETHER     | C15H14O2  | 226.28  | 5150-38-9         | stilbene         |                                              | <i>Pinus</i> spp.                                                                                         |
| 735 | 538976416 | 01502243 | RHAPONTIN                      | C21H24O9  | 420.42  | 155-58-8          | stilbene         | antifungal,<br>antioxidant                   | <i>Rheum</i> spp. and<br><i>Eucalyptus sideroxylon</i>                                                    |
| 736 | 538976391 | 01502223 | RESVERATROL                    | C14H12O3  | 228.25  | 501-36-0          | stilbene         | antifungal,<br>antibacterial                 | <i>Veratrum grandiflorum</i> ,<br><i>Pinus sibirica</i> , <i>Vitis vinifera</i> , <i>Arachis hypogaea</i> |
| 737 | 3520      | 00201078 | VIOLASTYRENE                   | C17H18O3  | 270.33  | 19034-96-9        | styrene          |                                              | <i>Dalbergia miscolobium</i>                                                                              |
| 738 | 1205855   | 01500814 | CANTHARIDIN                    | C10H12O4  | 196.20  | 56-25-7           | terpene          | irritant                                     | active principle of<br>cantharides and other<br>insects                                                   |
| 739 | 538977923 | 01500156 | CAMPBOR (1R)                   | C10H16O   | 152.24  | 464-49-3; 76-22-2 | terpene          | analgesic,<br>antiinfective,<br>antipruritic | <i>Cinnamomum camphora</i>                                                                                |
| 740 | 538977631 | 00310030 | RHODINYL ACETATE               | C12H22O2  | 198.31  |                   | terpene          |                                              | common constituent of<br>plant essential oils                                                             |
| 741 | 1204261   | 00300106 | 3-AMINO-beta-PINENE            | C10H18CIN | 187.71  |                   | terpene          |                                              | derivative                                                                                                |
| 742 | 538977912 | 00300160 | 3-PINANONE OXIME               | C10H17NO  | 167.25  |                   | terpene          |                                              | derivative                                                                                                |
| 743 | 538977813 | 01800005 | MENTHYL BENZOATE               | C17H24O2  | 260.38  |                   | terpene          |                                              | derivative                                                                                                |
| 744 | 538986487 | 01504800 | CHRYSANTHEMIC<br>ACID          | C10H16O2  | 168.24  | 10453-89-1        | terpene          | esters as insecticide                        | esters as constituent of<br>pyrethrum flowers                                                             |
| 745 | 1069      | 01500294 | CINEOLE                        | C10H18O   | 154.25  | 470-82-6          | terpene          | anthelminthic,<br>antiseptic,<br>expectorant | <i>eucalyptus</i> and<br>lavender oils                                                                    |
| 746 | 538976315 | 01501212 | LINALOOL (+)                   | C10H18O   | 154.25  |                   | terpene          |                                              | <i>Mentha arvensis</i> and<br>related essential oils                                                      |
| 747 | 538978095 | 01503134 | MENTHOL(-)                     | C10H20O   | 156.27  | 1490-04-6         | terpene          | analgesic (topical),<br>antipruritic agent   | <i>Mentha piperita</i> and<br>other <i>Mentha</i> spp.                                                    |
| 748 | 538977942 | 01501132 | NEROL                          | C10H18O   | 154.25  | 106-25-2          | terpene          | weak estrogen<br>receptor blocker            | neroli and bergamot<br>oils                                                                               |
| 749 | 538986708 | 01505297 | PERILLYL ALCOHOL               | C10H16O   | 152.24  | 536-59-4,         | terpene          | antineoplastic,                              | <i>Ocimum gratissimum</i>                                                                                 |

|     |           |          |                                    |           |        |            |            |                                                                          |                                                                                                                                                 |
|-----|-----------|----------|------------------------------------|-----------|--------|------------|------------|--------------------------------------------------------------------------|-------------------------------------------------------------------------------------------------------------------------------------------------|
|     |           |          |                                    |           |        | 18457-55-1 |            | apoptosis inducer;<br>skin irritant,<br>LD50(rat) 2100<br>mg/kg po       |                                                                                                                                                 |
| 750 | 1204176   | 00300564 | MENTHONE                           | C10H18O   | 154.25 | 14073-97-3 | terpene    |                                                                          | pennyroyal and<br>peppermint oils                                                                                                               |
| 751 | 538987856 | 01505810 | PEONIFLORIN                        | C23H30O11 | 482.49 | 23180-57-6 | terpene    | antiinflammatory,<br>antispasmodic,<br>antihypertensive,<br>antidiuretic | <i>Peonia</i> spp.                                                                                                                              |
| 752 | 538977624 | 00310019 | CHRYSANTHEMIC<br>ACID, ETHYL ESTER | C12H20O2  | 196.29 |            | terpene    | insecticide                                                              | pyrethrum flowers                                                                                                                               |
| 753 | 1204780   | 00300566 | CHRYSANTHEMYL<br>ALCOHOL           | C10H18O   | 154.25 | 5617-92-5  | terpene    |                                                                          | reduction product of<br>pyrethrin constituent                                                                                                   |
| 754 | 1210903   | 01502101 | PERILLIC ACID (-)                  | C10H14O2  | 166.22 | 7694-45-3  | terpene    | inhibits<br>posttranslational cys<br>isoprenylation,<br>blocks G-protein | <i>Salvia dorisiana</i>                                                                                                                         |
| 755 | 21279     | 01504167 | URSINOIC ACID                      | C15H16O5  | 276.29 | 30265-59-9 | triterpene |                                                                          | <i>Angelica ursina</i>                                                                                                                          |
| 756 | 538978234 | 01504073 | UVAOL                              | C30H50O2  | 442.73 | 545-46-0   | triterpene | antineoplastic                                                           | <i>Arctostaphylos</i> spp.,<br><i>Leucothoe keiskei</i> ,<br><i>Crataegus cuneata</i> ,<br><i>Osmanthus fragrans</i> ,<br><i>Ilex latifolia</i> |
| 757 | 1206003   | 01500815 | BETULIN                            | C30H50O2  | 442.73 | 473-98-3   | triterpene |                                                                          | <i>Betula</i> spp.                                                                                                                              |
| 758 | 538978138 | 01504081 | BETULINIC ACID                     | C29H46O3  | 442.69 | 472-15-1   | triterpene | antineoplastic                                                           | <i>Betula</i> spp.                                                                                                                              |
| 759 | 670       | 00102058 | OLEANOLIC ACID<br>ACETATE          | C32H50O4  | 498.75 | 4339-72-4  | triterpene |                                                                          | birch bark                                                                                                                                      |
| 760 | 538976379 | 00307045 | 11-OXOURSOLIC ACID<br>ACETATE      | C32H48O5  | 512.74 |            | triterpene |                                                                          | <i>Bursera delpechiana</i>                                                                                                                      |
| 761 | 538978140 | 01504082 | DIHYDROCELASTROL                   | C29H40O4  | 452.64 |            | triterpene |                                                                          | celastrol derivative                                                                                                                            |
| 762 | 538977898 | 00380004 | DIHYDROCELASTRYL<br>DIACETATE      | C33H44O6  | 536.72 |            | triterpene | chaperone stimulant                                                      | celastrol derivative                                                                                                                            |
| 763 | 538977720 | 01504181 | PRISTIMERIN                        | C30H40O4  | 464.65 | 1258-84-0  | triterpene | antineoplastic,<br>antiinflammatory                                      | <i>Celastrus</i> and <i>Maytenus</i><br>spp.                                                                                                    |
| 764 | 538986674 | 01505250 | MADECASSIC ACID                    | C30H48O6  | 504.71 | 18449-41-7 | triterpene | wound healing                                                            | <i>Centella asiatica</i>                                                                                                                        |
| 765 | 427       | 00100551 | FRIEDELIN                          | C30H50O   | 426.73 | 559-74-0   | triterpene |                                                                          | <i>Ceratopetalum apetalum</i><br><i>D. Don</i> , <i>Cunoniaceae</i>                                                                             |
| 766 | 538978105 | 01504016 | HEDERAGENIN                        | C30H48O4  | 472.71 | 465-99-6   | triterpene |                                                                          | <i>Clematis</i> , <i>Hedera</i> spp.                                                                                                            |
| 767 | 538985671 | 01500990 | ENOXOLONE                          | C30H46O4  | 470.70 | 471-53-4   | triterpene | antitussive,<br>antiinflammatory,<br>antibacterial                       | derivative                                                                                                                                      |

|     |           |          |                                     |           |        |            |  |                      |                                                                                                                             |
|-----|-----------|----------|-------------------------------------|-----------|--------|------------|--|----------------------|-----------------------------------------------------------------------------------------------------------------------------|
| 768 | 538986268 | 01504207 | PRISTIMEROL                         | C30H42O4  | 466.67 |            |  | triterpene           | derivative of pristimerin                                                                                                   |
| 769 | 538988029 | 01505175 | ASIATIC ACID                        | C30H48O5  | 488.71 | 464-92-6   |  | triterpene           | wound healing, experimental carcinogen<br><i>Dipterocarpus pilosus</i> , <i>Dryobalanops aromatica</i>                      |
| 770 | 538978108 | 01800123 | ECHINOCYSTIC ACID                   | C30H48O4  | 472.71 | 510-30-5   |  | triterpene           | <i>Echinocystis</i> spp.                                                                                                    |
| 771 | 538978096 | 01500989 | 18alpha-GLYCYRRHETINIC ACID         | C30H46O4  | 470.70 |            |  | triterpene           | antiinflammatory<br>epimer of aglycone<br><i>Glycyrrhiza glabra</i>                                                         |
| 772 | 538976378 | 00307043 | DEHYDRO (11,12)URSOLIC ACID LACTONE | C30H46O3  | 454.70 |            |  | triterpene           | <i>Eucalyptus</i> spp.                                                                                                      |
| 773 | 538985957 | 00201697 | EUPHOL                              | C30H50O   | 426.73 | 514-47-6   |  | triterpene           | <i>Euphorbia</i> spp.                                                                                                       |
| 774 | 43        | 00100552 | beta-AMYRIN ACETATE                 | C32H52O2  | 468.77 | 1616-93-9  |  | triterpene           | latof various species of rubber tree                                                                                        |
| 775 | 715       | 00100550 | OLEANOIC ACID                       | C30H48O3  | 456.72 | 508-02-1   |  | triterpene           | leaves of <i>Olea europea</i> and <i>Viscum album</i> L.                                                                    |
| 776 | 538976327 | 00240871 | OLEANANOIC ACID ACETATE             | C32H52O4  | 500.77 |            |  | triterpene           | <i>Machaerium kuhlmannii</i> and <i>Helichrysum chrysargyrum</i>                                                            |
| 777 | 538977791 | 01800031 | URSOLIC ACID                        | C30H48O3  | 456.72 | 77-52-1    |  | triterpene           | diuretic, antineoplastic, antiulcer<br><i>Rhododendron</i> spp., <i>Epigaea asiatica</i> , surface wax of fruits            |
| 778 | 538987988 | 01505133 | SUMARESINOLIC ACID                  | C30H48O4  | 472.71 | 559-64-8   |  | triterpene           | <i>Styrax benzoin</i> , <i>Enkianthus campanulatus</i> , <i>Orthopterygium huancuy</i>                                      |
| 779 | 2795      | 01800055 | ZEORIN                              | C30H52O2  | 444.75 | 22570-53-2 |  | triterpene           | various lichens (e.g., <i>Anaptychia</i> spp.) and <i>Iris missouriensis</i> roots                                          |
| 780 | 538977541 | 00100360 | beta-AMYRIN                         | C30H50O   | 426.73 | 559-70-6   |  | triterpene           | widespread in plants                                                                                                        |
| 781 | 538976362 | 00240470 | LANOSTEROL                          | C30H50O   | 426.73 | 79-63-0    |  | triterpene           | wool fat of sheep                                                                                                           |
| 782 | 538988005 | 01504017 | SAPINDOSIDE A                       | C41H66O12 | 750.98 | 27013-91-8 |  | triterpene glycoside | <i>Anemone coronaria</i> , <i>Sapindus</i> , <i>Hedera</i> , <i>Astrantia</i> spp.; alpha-hederin                           |
| 783 | 1210741   | 01500991 | GLYCYRRHIZIC ACID                   | C41H60O16 | 808.93 | 1405-86-3  |  | triterpene glycoside | 11beta-hydroxysteroid dehydrogenase inhibitor, antiinflammatory, expectorant, antihemorrhagic,<br><i>Glycyrrhiza glabra</i> |

|     |           |          |                         |           |         |            |                      | anti-HIV                                                                         |                                                                                                                                                                                               |
|-----|-----------|----------|-------------------------|-----------|---------|------------|----------------------|----------------------------------------------------------------------------------|-----------------------------------------------------------------------------------------------------------------------------------------------------------------------------------------------|
| 784 | 538977509 | 01504030 | beta-ESGIN              | C55H86O24 | 1131.28 | 6805-41-0  | triterpene glycoside | membrane permeabilizer                                                           | principal saponin<br><i>Aesculus hippocastanum</i>                                                                                                                                            |
| 785 | 538978129 | 01504059 | CHRYSANTHELLIN A        | C58H94O25 | 1191.38 | 73039-13-1 | triterpene glycoside |                                                                                  | saponin (sugar sequences tentative)                                                                                                                                                           |
| 786 | 1207086   | 00201538 | DECAHYDROGAMBOGIC ACID  | C38H54O8  | 638.85  |            | xanthone             |                                                                                  | derivative                                                                                                                                                                                    |
| 787 | 538977516 | 00300549 | ACETYL ISOGAMBOGIC ACID | C40H46O9  | 670.81  |            | xanthone             |                                                                                  | derivative                                                                                                                                                                                    |
| 788 | 1207034   | 00201540 | TETRAHYDROGAMBOGIC ACID | C38H48O8  | 632.80  |            | xanthone             |                                                                                  | derivative                                                                                                                                                                                    |
| 789 | 1207087   | 00201524 | DIHYDROGAMBOGIC ACID    | C38H46O8  | 630.79  |            | xanthone             |                                                                                  | derivative                                                                                                                                                                                    |
| 790 | 538986153 | 10100009 | DIMETHYL GAMBOGATE      | C40H48O8  | 656.82  |            | xanthone             |                                                                                  | derivative of gambogic acid                                                                                                                                                                   |
| 791 | 538977713 | 00201522 | GAMBOGIC ACID AMIDE     | C38H45NO7 | 627.78  |            | xanthone             | caspace inhibitor                                                                | derivative of Gambogic acid                                                                                                                                                                   |
| 792 | 538978104 | 01504015 | alpha-MANGOSTIN         | C24H26O6  | 410.47  | 6147-11-1  | xanthone             |                                                                                  | <i>Garcinia mangostana</i> ,<br><i>Hydnocarpus octandra</i> ,<br><i>H venenata</i>                                                                                                            |
| 793 | 538988148 | 01505481 | beta-MANGOSTIN          | C25H28O6  | 424.50  | 20931-37-7 | xanthone             |                                                                                  | <i>Garcinia mangostana</i>                                                                                                                                                                    |
| 794 | 1201332   | 00200007 | GAMBOGIC ACID           | C38H44O8  | 628.77  | 2752-65-0  | xanthone             | antiinflammatory, cytotoxic, inhibits HeLa cells in vitro; LD50(rat) 88 mg/kg ip | <i>Garcinia morella</i> ,<br><i>G hanburyii</i>                                                                                                                                               |
| 795 | 1207063   | 00201539 | GARCINOLIC ACID         | C38H46O9  | 646.78  |            | xanthone             |                                                                                  | <i>Garcinia</i> spp.; also hydrolysis product of gambogic acid                                                                                                                                |
| 796 | 538986693 | 00200523 | XANTHONE                | C13H8O2   | 196.21  | 90-47-1    | xanthone             |                                                                                  | gentian and other flowers                                                                                                                                                                     |
| 797 | 538977576 | 00240736 | 2-METHOXYXANTHONE       | C14H10O3  | 226.23  | 1214-20-6  | xanthone             |                                                                                  | <i>Mammea</i> and <i>Keilmeyera</i> spp.                                                                                                                                                      |
| 798 | 538977574 | 00240651 | 2-HYDROXYXANTHONE       | C13H8O3   | 212.21  |            | xanthone             |                                                                                  | <i>Mammer</i> and <i>Kielmeyera</i> spp.                                                                                                                                                      |
| 799 | 538987989 | 01505134 | MANGIFERIN              | C19H18O11 | 422.35  | 4773-96-0  | xanthone             | MAO inhibitor, immunostimulant                                                   | <i>Mangifera indica</i> ,<br><i>Iris</i> & <i>Salacia</i> spp.,<br><i>Aphloia</i> , <i>Athyrium</i> ,<br><i>Anemarrhena</i> ,<br><i>Belamcanda chinensis</i> ,<br><i>Hedysarum ussuriense</i> |
| 800 | 538977572 | 00240642 | METHYLNORLICHEX         | C15H12O5  | 272.26  |            | xanthone             |                                                                                  |                                                                                                                                                                                               |



---

---

ANTHONE

---

---
